# Supplementary material for: Visible-light-promoted photocatalyst-free alkylation and acylation of benzothiazoles
Source: Royal Society of Chemistry journal article supplement (doi:10.1039/d1ob00734c), 2021-01-01

# Supporting Information

## Visible-Light-Promoted Photocatalyst-Free Alkylation and Acylation of Benzothiazoles

Pengxing Jiang, Li Liu, Jiajing Tan\* and Hongguang Du\*

Department of Organic Chemistry, College of Chemistry, Beijing University of Chemical Technology (BUCT), Beijing 100029, China. E-mail: dhg@mail.buct.edu.cn; tanjj@mail.buct.edu.cn.

## *Contents*

|                                                                            |    |
|----------------------------------------------------------------------------|----|
| 1. General Methods .....                                                   | 3  |
| 2. General Procedure for the Acyl/Alkylation of Benzothiazoles.....        | 6  |
| 3. Scale-up Synthesis .....                                                | 23 |
| 4. Synthetic Application.....                                              | 24 |
| 5. Control Experiment.....                                                 | 25 |
| 6. UV-VIS Absorption Spectra .....                                         | 26 |
| 7. References .....                                                        | 29 |
| 8. <sup>1</sup> H NMR and <sup>13</sup> C NMR Spectra of the Products..... | 30 |

## 1. General Methods

All reactions were carried out in 5 mL glass bottle. The reactions were monitored by thin-layer chromatography on silica gel 60-F254 coated 0.2 mm plates. Visualization was accomplished by UV light (254 nm). The crude products were purified by flash column chromatography using silica gel (normal phase, 200-300 mesh).  $^1\text{H}$  NMR spectra were recorded on a 400 MHz spectrometer at ambient temperature. Data were reported as follows: (1) chemical shift in parts per million ( $\delta$ , ppm) from  $\text{CDCl}_3$  (7.26 ppm); (2) multiplicity (s = singlet, br = broad, d = doublet, t = triplet, q = quartet, and m = multiplet); (3) coupling constants (Hz).  $^{13}\text{C}$  NMR spectra were recorded on a 100 MHz spectrometer at ambient temperature. Chemical shifts were reported in ppm from  $\text{CDCl}_3$  (77.10 ppm). UV-VIS measurements were carried out on a Shimadzu UV-2501PC spectrophotometer. HR-MS analyses were carried out using a time-of-flight (TOF)-MS instrument with an electrospray ionization (ESI) source. All commercial materials were used as received unless otherwise noted.

## Synthesis of 1,4-Dihydropyridines

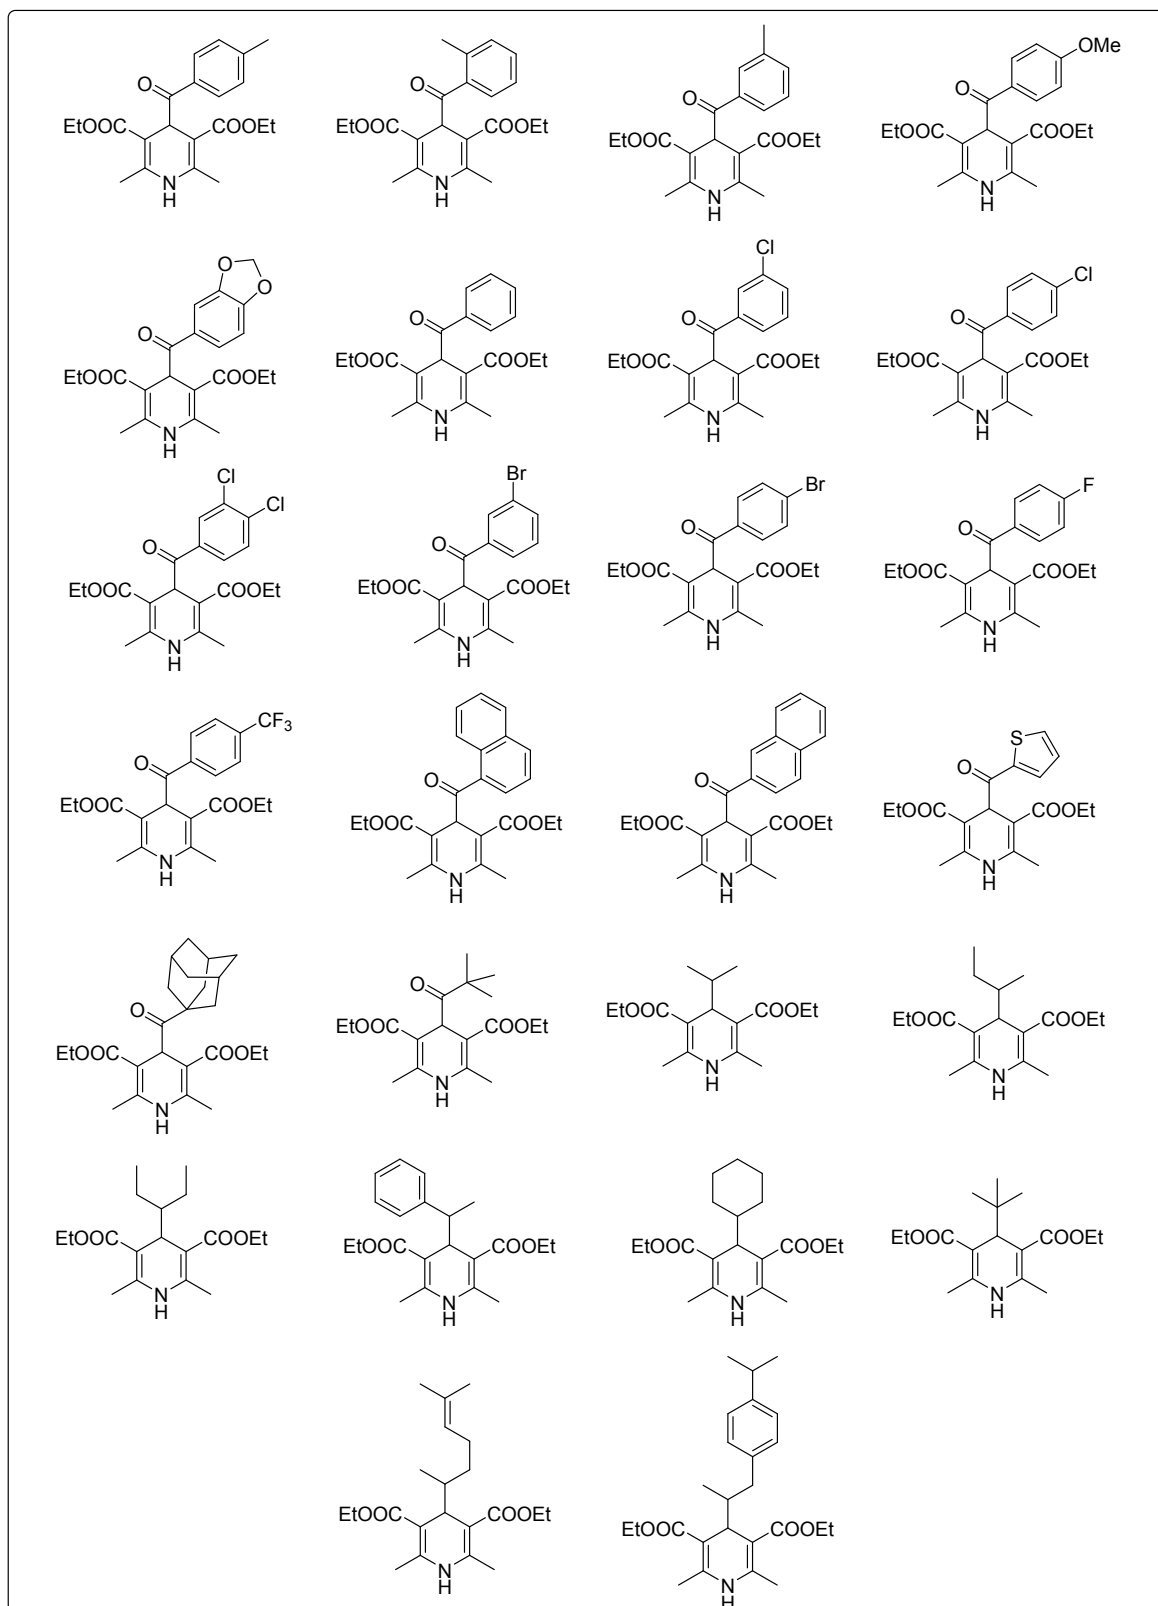

**Figure S1** Hantzsch esters used in this study.<sup>[1-6]</sup>

Compounds were synthesized via reported procedures.<sup>[1-6]</sup>

**Table S1** Optimization studies<sup>a</sup>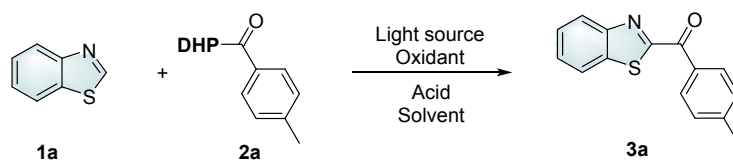

| Entry           | Oxidant                                                       | Light source | Acid (equiv.)                          | Solvent | Yield <sup>b</sup>  |
|-----------------|---------------------------------------------------------------|--------------|----------------------------------------|---------|---------------------|
| 1               | Na <sub>2</sub> S <sub>2</sub> O <sub>8</sub>                 | Blue LED     | TFA (3)                                | Dioxane | 16                  |
| 2               | Na <sub>2</sub> S <sub>2</sub> O <sub>8</sub>                 | Blue LED     | TFA (3)                                | DCM     | 37                  |
| 3               | Na <sub>2</sub> S <sub>2</sub> O <sub>8</sub>                 | Blue LED     | TFA (3)                                | MeOH    | 36                  |
| 4               | Na <sub>2</sub> S <sub>2</sub> O <sub>8</sub>                 | Blue LED     | TFA (3)                                | Acetone | 43                  |
| 5               | BPO                                                           | Blue LED     | TFA (3)                                | Acetone | 23                  |
| 6               | DTBP                                                          | Blue LED     | TFA (3)                                | Acetone | 31                  |
| 7               | Na <sub>2</sub> S <sub>2</sub> O <sub>8</sub>                 | Blue LED     | CH <sub>3</sub> COOH (3)               | Acetone | 15                  |
| 8               | Na <sub>2</sub> S <sub>2</sub> O <sub>8</sub>                 | Blue LED     | TsOH·H <sub>2</sub> O (3)              | Acetone | 29                  |
| 9               | Na <sub>2</sub> S <sub>2</sub> O <sub>8</sub>                 | Blue LED     | BF <sub>3</sub> ·Et <sub>2</sub> O (3) | Acetone | 67(66) <sup>c</sup> |
| 10              | Na <sub>2</sub> S <sub>2</sub> O <sub>8</sub>                 | Green LED    | BF <sub>3</sub> ·Et <sub>2</sub> O (3) | Acetone | 18                  |
| 11              | Na <sub>2</sub> S <sub>2</sub> O <sub>8</sub>                 | White LED    | BF <sub>3</sub> ·Et <sub>2</sub> O (3) | Acetone | 22                  |
| 12              | Na <sub>2</sub> S <sub>2</sub> O <sub>8</sub>                 | -            | BF <sub>3</sub> ·Et <sub>2</sub> O (3) | Acetone | trace               |
| 13 <sup>d</sup> | Na <sub>2</sub> S <sub>2</sub> O <sub>8</sub>                 | -            | BF <sub>3</sub> ·Et <sub>2</sub> O (3) | Acetone | 19                  |
| 14              | -                                                             | Blue LED     | BF <sub>3</sub> ·Et <sub>2</sub> O (3) | Acetone | trace               |
| 15              | Na <sub>2</sub> S <sub>2</sub> O <sub>8</sub>                 | Blue LED     | BF <sub>3</sub> ·Et <sub>2</sub> O (2) | Acetone | 55                  |
| 16              | Na <sub>2</sub> S <sub>2</sub> O <sub>8</sub>                 | Blue LED     | BF <sub>3</sub> ·Et <sub>2</sub> O (4) | Acetone | 47                  |
| 17 <sup>e</sup> | Na <sub>2</sub> S <sub>2</sub> O <sub>8</sub>                 | Blue LED     | BF <sub>3</sub> ·Et <sub>2</sub> O (3) | Acetone | 58                  |
| 18 <sup>f</sup> | Na <sub>2</sub> S <sub>2</sub> O <sub>8</sub>                 | Blue LED     | BF <sub>3</sub> ·Et <sub>2</sub> O (3) | Acetone | 61                  |
| 19              | (NH <sub>4</sub> ) <sub>2</sub> S <sub>2</sub> O <sub>8</sub> | Blue LED     | BF <sub>3</sub> ·Et <sub>2</sub> O (3) | Acetone | 27                  |
| 20              | K <sub>2</sub> S <sub>2</sub> O <sub>8</sub>                  | Blue LED     | BF <sub>3</sub> ·Et <sub>2</sub> O (3) | Acetone | 27                  |
| 21 <sup>g</sup> | Na <sub>2</sub> S <sub>2</sub> O <sub>8</sub>                 | -            | BF <sub>3</sub> ·Et <sub>2</sub> O (3) | Acetone | trace               |

<sup>a</sup>**1a** (0.1 mmol), **2a** (0.2 mmol), oxidant (0.2 mmol), acid (0.3 mmol), and solvent (0.5 mL) under 1 W blue LED at room temperature for 2 hours. <sup>b</sup>Yield determined by <sup>1</sup>H NMR with 1,3,5-trimethoxybenzene as the internal standard. <sup>c</sup>Isolated yields. <sup>d</sup>at 70 °C. <sup>e</sup>1 equiv. **2a** used. <sup>f</sup>3 equiv. **2a** used. <sup>g</sup>0.4 equiv. AgNO<sub>3</sub> was added. TFA = trifluoroacetic acid. BPO = benzoyl peroxide. DTBP = di-*tert*-butyl peroxide.

## 2. General Procedure for the Acyl/Alkylation of Benzothiazoles

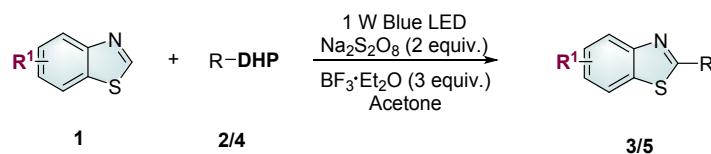

The 5 mL glass bottle was charged with benzothiazole (**1a**, 0.2 mmol, 27 mg), acyl-DHP reagent (**2a**, 0.4 mmol, 149 mg),  $\text{Na}_2\text{S}_2\text{O}_8$  (2.0 equiv., 92 mg), and  $\text{BF}_3 \cdot \text{Et}_2\text{O}$  (3.0 equiv., 85 mg) in acetone (1 mL), and the reaction mixture was stirred at blue LED ( $\lambda_{\text{max}} = 465 \text{ nm}$ ) for 15 hours. After completion, the solvent was evaporated on the rotary evaporator. Then the reaction mixture was extracted with ethyl acetate, and the organic phase was washed with brine, dried over anhydrous  $\text{Na}_2\text{SO}_4$ . After evaporating the solvent under reduced pressure, the crude product was purified by column chromatography using petroleum ether/ethyl acetate as the eluents.

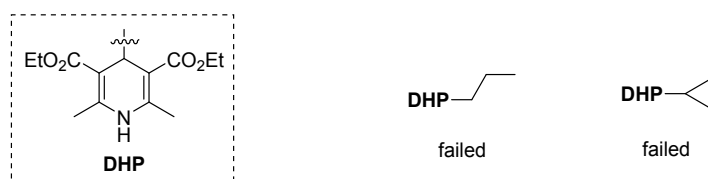

**Figure S2** Substrates that failed to react under the reaction conditions.

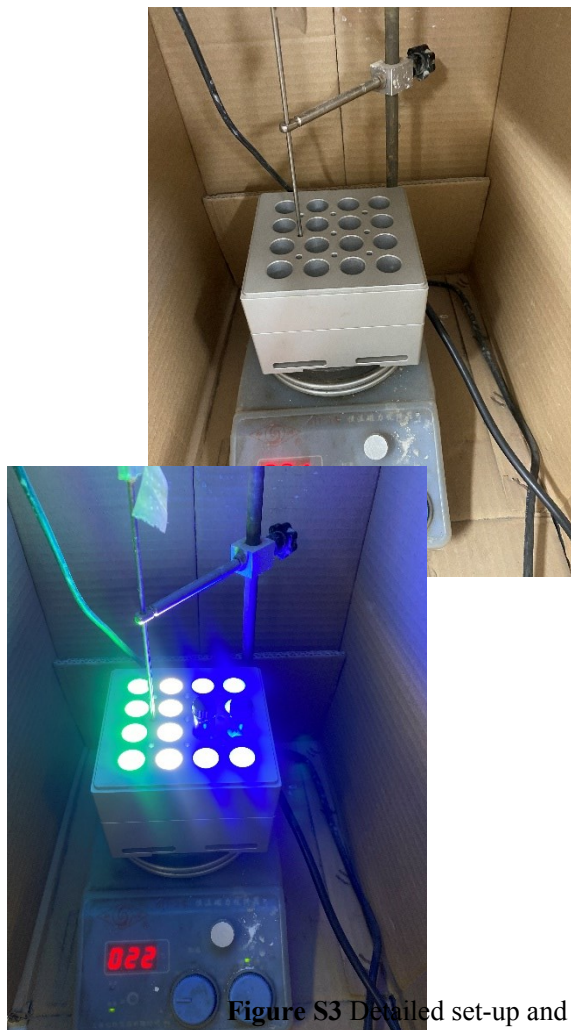

Figure S3 Detailed set-up and illumination system.

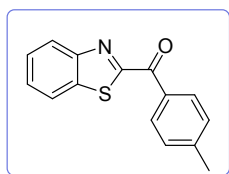

### benzo[d]thiazol-2-yl(p-tolyl)methanone (**3a**)

Following the general procedure, the crude product was purified by silica gel flash chromatography (PE: EA=200:1 as the eluent) to give **3a** (34 mg, 66% yield) as a yellow solid.

$^1\text{H NMR}$  (400 MHz,  $\text{CDCl}_3$ )  $\delta$  8.48 (d,  $J = 8.3$  Hz, 2H), 8.25 – 8.23 (m, 1H), 8.02 – 8.00 (m, 1H), 7.60 – 7.52 (m, 2H), 7.36 (d,  $J = 8.0$  Hz, 2H), 2.47 (s, 3H).

$^{13}\text{C NMR}$  (100 MHz,  $\text{CDCl}_3$ )  $\delta$  184.9, 167.4, 153.9, 145.0, 136.9, 132.4, 131.4, 129.2, 127.5, 126.8, 125.6, 122.1, 21.8.

**HRMS (ESI):** Calcd for  $\text{C}_{15}\text{H}_{12}\text{NOS}^+$   $[\text{M}+\text{H}]^+$  254.0634, found 254.0628.

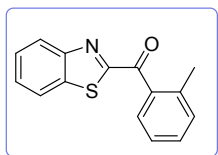

### benzo[d]thiazol-2-yl(o-tolyl)methanone (**3b**)

Following the general procedure, the crude product was purified by silica gel flash chromatography (PE: EA=200:1 as the eluent) to give **3b** (29 mg, 57% yield) as a yellow solid.

**<sup>1</sup>H NMR** (400 MHz, CDCl<sub>3</sub>) δ 8.19 (d, *J* = 6.7 Hz, 1H), 8.01 (t, *J* = 7.5 Hz, 2H), 7.58 – 7.52 (m, 2H), 7.48 (t, *J* = 7.6 Hz, 1H), 7.35 (t, *J* = 6.4 Hz, 2H), 2.52 (s, 3H).

**<sup>13</sup>C NMR** (100 MHz, CDCl<sub>3</sub>) δ 189.2, 167.5, 153.8, 139.1, 137.2, 135.1, 132.0, 131.5, 131.3, 127.7, 126.9, 125.8, 125.3, 122.2, 20.6.

**HRMS (ESI)**: Calcd for C<sub>15</sub>H<sub>12</sub>NOS<sup>+</sup> [M+H]<sup>+</sup> 254.0634, found 254.0628.

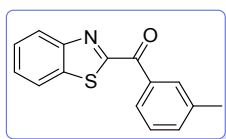

### benzo[d]thiazol-2-yl(m-tolyl)methanone (**3c**)

Following the general procedure, the crude product was purified by silica gel flash chromatography (PE: EA=200:1 as the eluent) to give **3c** (29 mg, 57% yield) as a yellow solid.

**<sup>1</sup>H NMR** (400 MHz, CDCl<sub>3</sub>) δ 8.38 (d, *J* = 7.1 Hz, 1H), 8.28 (s, 1H), 8.25 (d, *J* = 7.8 Hz, 1H), 8.02 (d, *J* = 7.7 Hz, 1H), 7.60 – 7.52 (m, 2H), 7.49 – 7.42 (m, 2H), 2.48 (s, 3H).

**<sup>13</sup>C NMR** (100 MHz, CDCl<sub>3</sub>) δ 185.7, 167.2, 153.8, 138.3, 137.0, 135.0, 134.7, 131.4, 128.6, 128.4, 127.5, 126.8, 125.7, 122.1, 21.4.

**HRMS (ESI)**: Calcd for C<sub>15</sub>H<sub>12</sub>NOS<sup>+</sup> [M+H]<sup>+</sup> 254.0634, found 254.0631.

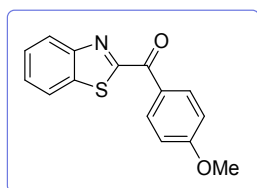



### benzo[d]thiazol-2-yl(4-methoxyphenyl)methanone (3d)

Following the general procedure, the crude product was purified by silica gel flash chromatography (PE: EA=200:1 as the eluent) to give **3d** (35 mg, 64% yield) as a white solid.

$^1\text{H NMR}$  (400 MHz,  $\text{CDCl}_3$ )  $\delta$  8.65 – 8.62 (m, 2H), 8.22 – 8.20 (m, 1H), 7.99 – 7.97 (m, 1H), 7.57 – 7.48 (m, 2H), 7.04 – 7.00 (m, 2H), 3.90 (s, 3H).

$^{13}\text{C NMR}$  (100 MHz,  $\text{CDCl}_3$ )  $\delta$  183.3, 167.9, 164.4, 153.9, 136.9, 133.8, 127.7, 127.3, 126.8, 125.5, 122.1, 113.9, 55.5.

**HRMS (ESI)**: Calcd for  $\text{C}_{15}\text{H}_{12}\text{NO}_2\text{S}^+$   $[\text{M}+\text{H}]^+$  270.0583, found 270.0572.

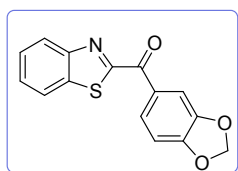

### benzo[d][1,3]dioxol-5-yl(benzo[d]thiazol-2-yl)methanone (3e)

Following the general procedure, the crude product was purified by silica gel flash chromatography (PE: EA=200:1 as the eluent) to give **3e** (39 mg, 68% yield) as a yellow solid.

$^1\text{H NMR}$  (400 MHz,  $\text{CDCl}_3$ )  $\delta$  8.42 – 8.39 (m, 1H), 8.23 (d,  $J = 7.6$  Hz, 1H), 8.07 (d,  $J = 1.7$  Hz, 1H), 8.01 (d,  $J = 7.0$  Hz, 1H), 7.60 – 7.52 (m, 2H), 6.98 (d,  $J = 8.3$  Hz, 1H), 6.11 (s, 2H).

$^{13}\text{C NMR}$  (100 MHz,  $\text{CDCl}_3$ )  $\delta$  182.9, 167.6, 153.8, 152.7, 148.0, 136.9, 129.3, 128.7, 127.4, 126.8, 125.6, 122.1, 110.7, 108.2, 102.0.

**HRMS (ESI)**: Calcd for  $\text{C}_{15}\text{H}_{10}\text{NO}_3\text{S}^+$   $[\text{M}+\text{H}]^+$  284.0376, found 284.0370.

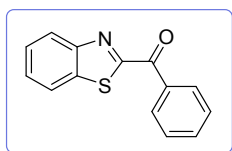

### benzo[d]thiazol-2-yl(phenyl)methanone (3f)

Following the general procedure, the crude product was purified by silica gel flash chromatography (PE: EA=200:1 as the eluent) to give **3f** (20 mg, 40% yield) as a yellow solid.

<sup>1</sup>H NMR (400 MHz, CDCl<sub>3</sub>) δ 8.56 (d, *J* = 7.6 Hz, 2H), 8.25 (d, *J* = 7.8 Hz, 1H), 8.02 (d, *J* = 7.7 Hz, 1H), 7.67 (t, *J* = 7.3 Hz, 1H), 7.61 – 7.54 (m, 4H).

<sup>13</sup>C NMR (100 MHz, CDCl<sub>3</sub>) δ 185.4, 167.1, 153.9, 137.0, 135.0, 133.9, 131.3, 128.5, 127.6, 126.9, 125.7, 122.1.

HRMS (ESI): Calcd for C<sub>14</sub>H<sub>10</sub>NOS<sup>+</sup> [M+H]<sup>+</sup> 240.0478, found 240.0476.

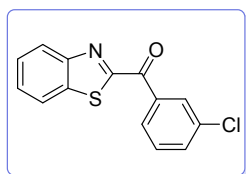

#### benzo[d]thiazol-2-yl(3-chlorophenyl)methanone (**3g**)

Following the general procedure, the crude product was purified by silica gel flash chromatography (PE: EA=200:1 as the eluent) to give **3g** (19 mg, 35% yield) as a yellow solid.

<sup>1</sup>H NMR (400 MHz, CDCl<sub>3</sub>) δ 8.56 (s, 1H), 8.48 (d, *J* = 7.8 Hz, 1H), 8.27 (d, *J* = 7.9 Hz, 1H), 8.03 (d, *J* = 7.7 Hz, 1H), 7.65 – 7.49 (m, 4H).

<sup>13</sup>C NMR (100 MHz, CDCl<sub>3</sub>) δ 184.0, 166.4, 153.8, 137.1, 136.4, 134.7, 133.8, 131.1, 129.8, 129.4, 127.9, 127.1, 125.9, 122.2.

HRMS (ESI): Calcd for C<sub>14</sub>H<sub>9</sub>ClNOS<sup>+</sup> [M+H]<sup>+</sup> 274.0088, found 274.0084.

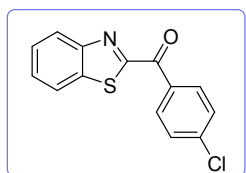

#### benzo[d]thiazol-2-yl(4-chlorophenyl)methanone (**3h**)

Following the general procedure, the crude product was purified by silica gel flash chromatography (PE: EA=200:1 as the eluent) to give **3h** (22 mg, 40% yield) as a yellow solid.

**<sup>1</sup>H NMR** (400 MHz, CDCl<sub>3</sub>) δ 8.57 – 8.54 (m, 2H), 8.25 – 8.22(m, 1H), 8.03 – 8.01 (m, 1H), 7.62 – 7.58 (m, 1H), 7.57 – 7.55 (m, 1H), 7.55 – 7.52 (m, 2H).

**<sup>13</sup>C NMR** (100 MHz, CDCl<sub>3</sub>) δ 184.0, 166.8, 153.8, 140.6, 137.0, 133.2, 132.7, 128.8, 127.8, 127.0, 125.7, 122.2.

**HRMS (ESI):** Calcd for C<sub>14</sub>H<sub>9</sub>ClNOS<sup>+</sup> [M+H]<sup>+</sup> 274.0088, found 274.0083.

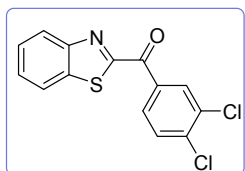

### **benzo[d]thiazol-2-yl(3,4-dichlorophenyl)methanone (3i)**

Following the general procedure, the crude product was purified by silica gel flash chromatography (PE: EA=200:1 as the eluent) to give **3i** (24 mg, 39% yield) as a yellow solid.

**<sup>1</sup>H NMR** (400 MHz, CDCl<sub>3</sub>) δ 8.74 (d, *J* = 2.0 Hz, 1H), 8.48 – 8.45 (m, 1H), 8.27 – 8.25 (m, 1H), 8.03 – 8.01 (m, 1H), 7.65 (d, *J* = 8.4 Hz, 1H), 7.61 – 7.55 (m, 2H).

**<sup>13</sup>C NMR** (100 MHz, CDCl<sub>3</sub>) δ 182.9, 166.2, 153.7, 138.7, 137.1, 134.4, 133.1, 133.1, 130.6, 130.3, 128.0, 127.1, 125.9, 122.2.

**HRMS (ESI):** Calcd for C<sub>14</sub>H<sub>8</sub>Cl<sub>2</sub>NOS<sup>+</sup> [M+H]<sup>+</sup> 307.9698, found 307.9694.

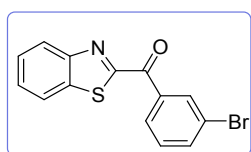

### **benzo[d]thiazol-2-yl(3-bromophenyl)methanone (3j)**

Following the general procedure, the crude product was purified by silica gel flash chromatography (PE: EA=200:1 as the eluent) to give **3j** (23 mg, 36% yield) as a yellow solid.

**<sup>1</sup>H NMR** (400 MHz, CDCl<sub>3</sub>) δ 8.70 (t, *J* = 1.7 Hz, 1H), 8.54 – 8.52 (m, 1H), 8.26 (d, *J* = 7.7 Hz, 1H), 8.02 (d, *J* = 7.7 Hz, 1H), 7.79 (d, *J* = 8.0 Hz, 1H), 7.58 (t, *J* = 8.5 Hz, 2H), 7.44 (t, *J* = 7.9 Hz, 1H).

$^{13}\text{C}$  NMR (100 MHz,  $\text{CDCl}_3$ )  $\delta$  183.9, 166.4, 153.8, 137.0, 136.7, 134.0, 131.9, 130.0, 129.9, 127.9, 127.1, 125.9, 122.6, 122.2.

**HRMS (ESI):** Calcd for  $\text{C}_{14}\text{H}_8\text{BrNNaOS}^+$   $[\text{M}+\text{Na}]^+$  339.9402, found 339.9397.

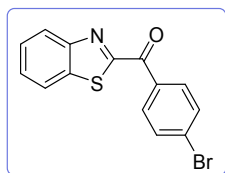

### benzo[d]thiazol-2-yl(4-bromophenyl)methanone (**3k**)

Following the general procedure, the crude product was purified by silica gel flash chromatography (PE: EA=200:1 as the eluent) to give **3k** (32 mg, 50% yield) as a yellow solid.

$^1\text{H}$  NMR (400 MHz,  $\text{CDCl}_3$ )  $\delta$  8.48 (d,  $J = 7.7$  Hz, 2H), 8.24 (d,  $J = 7.8$  Hz, 1H), 8.02 (d,  $J = 7.5$  Hz, 1H), 7.71 (d,  $J = 7.6$  Hz, 2H), 7.62 – 7.54 (m, 2H).

$^{13}\text{C}$  NMR (100 MHz,  $\text{CDCl}_3$ )  $\delta$  184.3, 166.7, 153.8, 137.0, 133.7, 132.7, 131.8, 129.5, 127.8, 127.0, 125.8, 122.2.

**HRMS (ESI):** Calcd for  $\text{C}_{14}\text{H}_9\text{BrNOS}^+$   $[\text{M}+\text{H}]^+$  317.9583, found 317.9581.

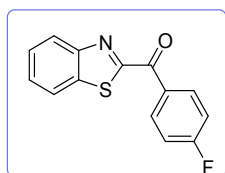

### benzo[d]thiazol-2-yl(4-fluorophenyl)methanone (**3l**)

Following the general procedure, the crude product was purified by silica gel flash chromatography (PE: EA=200:1 as the eluent) to give **3l** (29 mg, 61% yield) as a yellow solid.

$^1\text{H}$  NMR (400 MHz,  $\text{CDCl}_3$ )  $\delta$  8.48 (d,  $J = 7.7$  Hz, 2H), 8.24 (d,  $J = 7.8$  Hz, 1H), 8.02 (d,  $J = 7.5$  Hz, 1H), 7.71 (d,  $J = 7.6$  Hz, 2H), 7.62 – 7.54 (m, 2H).

$^{13}\text{C}$  NMR (100 MHz,  $\text{CDCl}_3$ )  $\delta$  183.5, 167.3 (d,  $J = 64.8$  Hz, 1C), 165.1, 153.8, 137.0, 134.2 (d,  $J = 9.4$  Hz, 1C), 131.3 (d,  $J = 2.9$  Hz, 1C), 127.7, 127.0, 125.7, 122.2, 115.7 (d,  $J = 21.7$  Hz, 1C).

**HRMS (ESI):** Calcd for  $C_{14}H_9FNOS^+$   $[M+H]^+$  258.0383, found 258.0381.

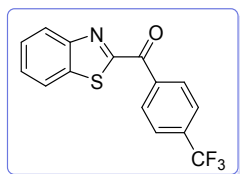

**benzo[d]thiazol-2-yl(4-(trifluoromethyl)phenyl)methanone (3m)**

Following the general procedure, the crude product was purified by silica gel flash chromatography (PE: EA=200:1 as the eluent) to give **3m** (21 mg, 34% yield) as a yellow solid.

**$^1H$  NMR** (400 MHz,  $CDCl_3$ )  $\delta$  8.67 (d,  $J = 8.1$  Hz, 2H), 8.26 – 8.24 (m, 1H), 8.05 – 8.03 (m, 1H), 7.83 (d,  $J = 8.3$  Hz, 2H), 7.64 – 7.56 (m, 2H).

**$^{13}C$  NMR** (100 MHz,  $CDCl_3$ )  $\delta$  184.5, 166.2, 153.8, 137.8, 137.1, 134.7 (q,  $J = 32.9$  Hz, 1C), 131.5, 128.0, 127.2, 125.9, 125.4 (q,  $J = 3.7$  Hz, 1C), 123.7 (q,  $J = 272.7$  Hz, 1C), 122.2.

**HRMS (ESI):** Calcd for  $C_{15}H_9F_3NOS^+$   $[M+H]^+$  308.0351, found 208.0347.

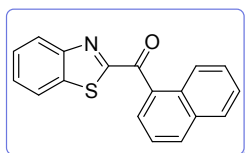

**benzo[d]thiazol-2-yl(naphthalen-1-yl)methanone (3n)**

Following the general procedure, the crude product was purified by silica gel flash chromatography (PE: EA=200:1 as the eluent) to give **3n** (23 mg, 40% yield) as a yellow solid.

**$^1H$  NMR** (400 MHz,  $CDCl_3$ )  $\delta$  8.52 (d,  $J = 8.3$  Hz, 1H), 8.36 (d,  $J = 7.2$  Hz, 1H), 8.20 – 8.17 (m, 1H), 8.11 (d,  $J = 8.2$  Hz, 1H), 8.05 – 8.03 (m, 1H), 7.94 (d,  $J = 7.7$  Hz, 1H), 7.63 – 7.55 (m, 5H).

**$^{13}C$  NMR** (100 MHz,  $CDCl_3$ )  $\delta$  188.3, 168.0, 153.7, 137.3, 133.9, 133.5, 132.2, 131.9, 131.1, 128.6, 128.0, 127.7, 126.9, 126.5, 125.8, 125.4, 124.3, 122.2.

**HRMS (ESI):** Calcd for  $C_{18}H_{11}NNaOS^+$   $[M+Na]^+$  312.0454, found 312.0448.

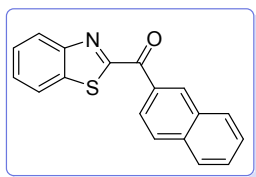

### benzo[d]thiazol-2-yl(naphthalen-2-yl)methanone (**3o**)

Following the general procedure, the crude product was purified by silica gel flash chromatography (PE: EA=200:1 as the eluent) to give **3o** (31 mg, 53% yield) as a yellow solid.

$^1\text{H NMR}$  (400 MHz,  $\text{CDCl}_3$ )  $\delta$  9.38 (s, 1H), 8.48 (d,  $J = 8.6$  Hz, 1H), 8.33 (d,  $J = 7.9$  Hz, 1H), 8.08 – 8.03 (m, 2H), 8.01 (d,  $J = 8.6$  Hz, 1H), 7.95 (d,  $J = 8.1$  Hz, 1H), 7.66 – 7.54 (m, 4H).

$^{13}\text{C NMR}$  (100 MHz,  $\text{CDCl}_3$ )  $\delta$  185.1, 167.4, 153.9, 137.0, 135.9, 134.3, 132.4, 132.2, 130.2, 129.0, 128.3, 127.8, 127.6, 126.9, 126.7, 125.8, 125.7, 122.2.

**HRMS (ESI):** Calcd for  $\text{C}_{18}\text{H}_{12}\text{NOS}^+$   $[\text{M}+\text{H}]^+$  290.0634, found 290.0625.

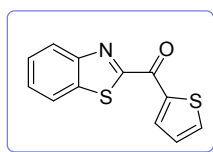

### benzo[d]thiazol-2-yl(thiophen-2-yl)methanone (**3p**)

Following the general procedure, the crude product was purified by silica gel flash chromatography (PE: EA=200:1 as the eluent) to give **3p** (20 mg, 40% yield) as a white solid.

$^1\text{H NMR}$  (400 MHz,  $\text{CDCl}_3$ )  $\delta$  8.77 (d,  $J = 3.9$  Hz, 1H), 8.25 (d,  $J = 8.2$  Hz, 1H), 8.01 (d,  $J = 7.7$  Hz, 1H), 7.84 (d,  $J = 4.9$  Hz, 1H), 7.61 – 7.52 (m, 2H), 7.27 (d,  $J = 4.1$  Hz, 1H).

$^{13}\text{C NMR}$  (100 MHz,  $\text{CDCl}_3$ )  $\delta$  177.0, 166.6, 153.7, 139.7, 137.4, 137.0, 136.8, 128.4, 127.5, 126.9, 125.5, 122.2.

**HRMS (ESI):** Calcd for  $\text{C}_{12}\text{H}_8\text{NOS}_2^+$   $[\text{M}+\text{H}]^+$  246.0042, found 246.0038.

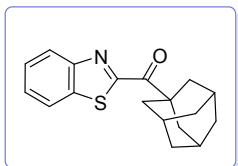

**((1*r*,3*R*,5*S*)-adamantan-1-yl)(benzo[d]thiazol-2-yl)methanone (3q)**

Following the general procedure, the crude product was purified by silica gel flash chromatography (PE: EA=200:1 as the eluent) to give **3q** (31 mg, 51% yield) as a white solid.

**<sup>1</sup>H NMR** (400 MHz, CDCl<sub>3</sub>) δ 8.17 (d, *J* = 8.1 Hz, 1H), 7.96 (d, *J* = 7.7 Hz, 1H), 7.56 – 7.47 (m, 2H), 2.31 (d, *J* = 2.6 Hz, 6H), 2.14 (s, 3H), 1.84 (s, 6H).

**<sup>13</sup>C NMR** (100 MHz, CDCl<sub>3</sub>) δ 199.3, 166.2, 153.8, 136.5, 127.2, 126.5, 125.5, 122.0, 46.9, 38.3, 36.7, 28.1.

**HRMS (ESI):** Calcd for C<sub>18</sub>H<sub>19</sub>NNaOS<sup>+</sup> [M+Na]<sup>+</sup> 320.1080, found 320.1075.

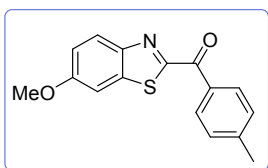

**(6-methoxybenzo[d]thiazol-2-yl)(p-tolyl)methanone (3s)**

Following the general procedure, the crude product was purified by silica gel flash chromatography (PE: EA=200:1 as the eluent) to give **3s** (45 mg, 75% yield) as a yellow solid.

**<sup>1</sup>H NMR** (400 MHz, CDCl<sub>3</sub>) δ 8.46 (d, *J* = 8.1 Hz, 2H), 8.09 (d, *J* = 9.1 Hz, 1H), 7.39 (d, *J* = 2.3 Hz, 1H), 7.34 (d, *J* = 8.0 Hz, 2H), 7.17 – 7.14 (m, 1H), 3.91 (s, 3H), 2.45 (s, 3H).

**<sup>13</sup>C NMR** (100 MHz, CDCl<sub>3</sub>) δ 184.7, 164.9, 159.6, 148.5, 144.7, 139.0, 132.6, 131.3, 129.2, 126.4, 117.5, 103.4, 55.8, 21.8.

**HRMS (ESI):** Calcd for C<sub>16</sub>H<sub>14</sub>NO<sub>2</sub>S<sup>+</sup> [M+H]<sup>+</sup> 284.0740, found 284.0734.

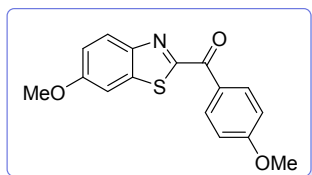

**(6-methoxybenzo[d]thiazol-2-yl)(4-methoxyphenyl)methanone (3t)**

Following the general procedure, the crude product was purified by silica gel flash chromatography (PE: EA=200:1 as the eluent) to give **3t** (43 mg, 72% yield) as a yellow oil.

<sup>1</sup>H NMR (400 MHz, CDCl<sub>3</sub>) δ 8.63 (d, *J* = 9.0 Hz, 2H), 8.09 (d, *J* = 9.1 Hz, 1H), 7.40 (d, *J* = 2.5 Hz, 1H), 7.18 – 7.15 (m, 1H), 7.04 – 7.01 (m, 2H), 3.91 (d, *J* = 1.3 Hz, 6H).

<sup>13</sup>C NMR (100 MHz, CDCl<sub>3</sub>) δ 183.2, 165.4, 164.2, 159.5, 148.5, 138.9, 133.7, 127.9, 126.2, 117.4, 113.8, 103.4, 55.8, 55.5.

HRMS (ESI): Calcd for C<sub>16</sub>H<sub>14</sub>NO<sub>3</sub>S<sup>+</sup> [M+H]<sup>+</sup> 300.0689, found 300.0693.

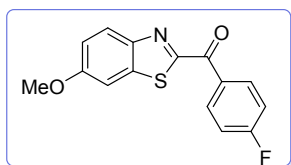

**(4-fluorophenyl)(6-methoxybenzo[d]thiazol-2-yl)methanone (3u)**

Following the general procedure, the crude product was purified by silica gel flash chromatography (PE: EA=200:1 as the eluent) to give **3u** (45 mg, 90% yield) as a yellow oil.

<sup>1</sup>H NMR (400 MHz, CDCl<sub>3</sub>) δ 8.66 – 8.63 (m, 2H), 8.09 (d, *J* = 9.1 Hz, 1H), 7.40 (d, *J* = 2.1 Hz, 1H), 7.24 – 7.17 (m, 3H), 3.92 (s, 3H).

<sup>13</sup>C NMR (100 MHz, CDCl<sub>3</sub>) δ 183.3, 167.5, 164.7 (d, *J* = 48.17 Hz, 1C), 159.8, 148.4, 139.1, 133.9 (d, *J* = 9.3 Hz, 1C), 131.4 (d, *J* = 2.9 Hz, 1C), 117.7, 115.7, 115.5, 103.3, 55.8.

HRMS (ESI): Calcd for C<sub>15</sub>H<sub>11</sub>FNO<sub>2</sub>S<sup>+</sup> [M+H]<sup>+</sup> 288.0489, found 288.0482.



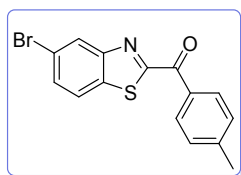

**(5-bromobenzo[d]thiazol-2-yl)(p-tolyl)methanone (3v)**

Following the general procedure, the crude product was purified by silica gel flash chromatography (PE: EA=200:1 as the eluent) to give **3v** (21 mg, 32% yield) as a yellow solid.

**<sup>1</sup>H NMR** (400 MHz, CDCl<sub>3</sub>) δ 8.47 (d, *J* = 8.2 Hz, 2H), 8.16 (d, *J* = 1.6 Hz, 1H), 8.08 (d, *J* = 8.8 Hz, 1H), 7.69 – 7.66 (m, 1H), 7.36 (d, *J* = 8.1 Hz, 2H), 2.47 (s, 3H).

**<sup>13</sup>C NMR** (100 MHz, CDCl<sub>3</sub>) δ 184.4, 169.0, 154.9, 145.3, 135.7, 132.1, 131.4, 130.6, 129.3, 128.3, 123.2, 120.4, 21.8.

**HRMS (ESI):** Calcd for C<sub>15</sub>H<sub>10</sub>BrNNaOS<sup>+</sup> [M+Na]<sup>+</sup> 353.9559, found 353.9552.

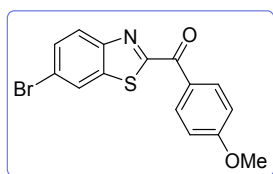

**(6-bromobenzo[d]thiazol-2-yl)(4-methoxyphenyl)methanone (3w)**

Following the general procedure, the crude product was purified by silica gel flash chromatography (PE: EA=200:1 as the eluent) to give **3w** (21 mg, 32% yield) as a yellow solid.

**<sup>1</sup>H NMR** (400 MHz, CDCl<sub>3</sub>) δ 8.64 (d, *J* = 9.0 Hz, 2H), 8.16 (d, *J* = 1.8 Hz, 1H), 8.08 (d, *J* = 8.8 Hz, 1H), 7.68 (dd, *J* = 8.8, 1.9 Hz, 1H), 7.06 – 7.02 (m, 2H), 3.93 (s, 3H).

**<sup>13</sup>C NMR** (100 MHz, CDCl<sub>3</sub>) δ 182.9, 164.6, 152.7, 143.8, 138.5, 133.9, 130.6, 127.6, 126.7, 124.8, 121.7, 114.0, 55.7.

**HRMS (ESI):** Calcd for C<sub>15</sub>H<sub>11</sub>BrNO<sub>2</sub>S<sup>+</sup> [M+H]<sup>+</sup> 347.09688, found 347.9685.

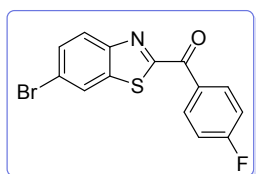

### (6-bromobenzo[d]thiazol-2-yl)(4-fluorophenyl)methanone (**3x**)

Following the general procedure, the crude product was purified by silica gel flash chromatography (PE: EA=200:1 as the eluent) to give **3x** (38 mg, 57% yield) as a yellow solid.

**<sup>1</sup>H NMR** (400 MHz, CDCl<sub>3</sub>) δ 8.68 – 8.64 (m, 2H), 8.17 (d, *J* = 1.8 Hz, 1H), 8.08 (d, *J* = 8.8 Hz, 1H), 7.71 – 7.68 (m, 1H), 7.23 (d, *J* = 8.7 Hz, 2H)

**<sup>13</sup>C NMR** (100 MHz, CDCl<sub>3</sub>) δ 183.1, 167.7 (d, *J* = 23.4 Hz, 1C), 165.2, 152.6, 138.5, 134.1 (d, *J* = 9.3 Hz, 1C), 131.0, 130.7, 126.7, 124.8, 122.0, 115.8 (d, *J* = 2.1 Hz, 1C).

**HRMS (ESI)**: Calcd for C<sub>14</sub>H<sub>8</sub>BrFNOS<sup>+</sup> [M+H]<sup>+</sup> 335.9489, found 335.9478.

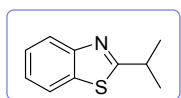

### 2-isopropylbenzo[d]thiazolen (**5a**)

Following the general procedure, the crude product was purified by silica gel flash chromatography (PE: EA=200:1 as the eluent) to give **5a** (21 mg, 58% yield) as a yellow oil.

**<sup>1</sup>H NMR** (400 MHz, CDCl<sub>3</sub>) δ 7.98 (d, *J* = 8.1 Hz, 1H), 7.84 (d, *J* = 8.0 Hz, 1H), 7.46 – 7.42 (m, 1H), 7.35 – 7.31 (m, 1H), 3.47 – 3.37 (m, 1H), 1.48 (d, *J* = 6.9 Hz, 6H).

**<sup>13</sup>C NMR** (100 MHz, CDCl<sub>3</sub>) δ 178.6, 153.1, 134.7, 125.8, 124.5, 122.5, 121.5, 34.1, 22.9.

**HRMS (ESI)**: Calcd for C<sub>10</sub>H<sub>12</sub>NS<sup>+</sup> [M+H]<sup>+</sup> 178.0685, found 178.0684.

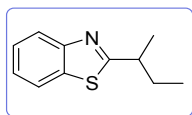

### 2-(sec-butyl)benzo[d]thiazole (**5b**)

Following the general procedure, the crude product was purified by silica gel flash chromatography (PE: EA=200:1 as the eluent) to give **5b** (20 mg, 52% yield) as a yellow oil.

**<sup>1</sup>H NMR** (400 MHz, CDCl<sub>3</sub>) δ 7.98 (d, *J* = 8.1 Hz, 1H), 7.85 (d, *J* = 7.9 Hz, 1H), 7.46 – 7.42 (m, 1H), 7.35 – 7.31 (m, 1H), 3.25 – 3.17 (m, 1H), 1.97 – 1.86 (m, 1H), 1.83 – 1.72 (m, 1H), 1.45 (d, *J* = 6.9 Hz, 3H), 0.98 (t, *J* = 7.4 Hz, 3H).

**<sup>13</sup>C NMR** (100 MHz, CDCl<sub>3</sub>) δ 177.9, 153.1, 134.6, 125.8, 124.5, 122.6, 121.5, 41.0, 30.6, 20.7, 11.8.

**HRMS (ESI)**: Calcd for C<sub>11</sub>H<sub>14</sub>NS<sup>+</sup> [M+H]<sup>+</sup> 192.0841, found 192.0839.

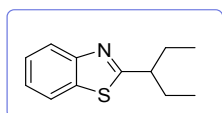

### 2-(pentan-3-yl)benzo[d]thiazole (**5c**)

Following the general procedure, the crude product was purified by silica gel flash chromatography (PE: EA=200:1 as the eluent) to give **5c** (21 mg, 51% yield) as a yellow oil.

**<sup>1</sup>H NMR** (400 MHz, CDCl<sub>3</sub>) δ 8.02 (d, *J* = 8.1 Hz, 1H), 7.88 (d, *J* = 8.0 Hz, 1H), 7.49 – 7.45 (m, 1H), 7.38 – 7.34 (m, 1H), 3.06 – 2.99 (m, 1H), 1.92 – 1.80 (m, 4H), 0.96 (t, *J* = 7.4 Hz, 6H).

**<sup>13</sup>C NMR** (100 MHz, CDCl<sub>3</sub>) δ 176.8, 153.0, 134.7, 125.7, 124.5, 122.6, 121.5, 48.7, 28.9, 11.9.

**HRMS (ESI)**: Calcd for C<sub>12</sub>H<sub>16</sub>NS<sup>+</sup> [M+H]<sup>+</sup> 206.0998, found 206.0996.

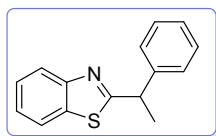

### 2-(1-phenylethyl)benzo[d]thiazole (**5d**)

Following the general procedure, the crude product was purified by silica gel flash chromatography (PE: EA=200:1 as the eluent) to give **5d** (17 mg, 35% yield) as a yellow oil.

**<sup>1</sup>H NMR** (400 MHz, CDCl<sub>3</sub>) δ 8.01 (d, *J* = 8.0 Hz, 1H), 7.77 (d, *J* = 8.0 Hz, 1H), 7.45 – 7.25 (m, 7H), 4.58 (q, *J* = 7.2 Hz, 1H), 1.87 (d, *J* = 7.2 Hz, 3H).

$^{13}\text{C}$  NMR (100 MHz,  $\text{CDCl}_3$ )  $\delta$  176.3, 153.1, 143.1, 135.3, 128.7, 127.6, 127.2, 125.8, 124.7, 122.8, 121.4, 44.8, 21.2.

**HRMS (ESI):** Calcd for  $\text{C}_{15}\text{H}_{14}\text{NS}^+$   $[\text{M}+\text{H}]^+$  240.0841, found 240.0832.

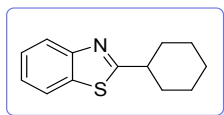

### 2-cyclohexylbenzo[d]thiazole (5e)

Following the general procedure, the crude product was purified by silica gel flash chromatography (PE: EA=200:1 as the eluent) to give **5e** (34 mg, 75% yield) as a yellow oil.

$^1\text{H}$  NMR (400 MHz,  $\text{CDCl}_3$ )  $\delta$  7.97 (d,  $J = 8.0$  Hz, 1H), 7.83 (d,  $J = 8.0$  Hz, 1H), 7.45 – 7.40 (m, 1H), 7.34 – 7.29 (m, 1H), 3.12 – 3.06 (m, 1H), 2.21 – 2.18 (m, 2H), 1.90 – 1.85 (m, 2H), 1.77 – 1.74 (m, 1H), 1.68 – 1.58 (m, 2H), 1.49 – 1.38 (m, 2H), 1.36 – 1.28 (m, 1H).

$^{13}\text{C}$  NMR (100 MHz,  $\text{CDCl}_3$ )  $\delta$  176.5, 152.0, 133.5, 124.7, 123.4, 121.5, 120.5, 42.4, 32.3, 25.0, 24.7.

**HRMS (ESI):** Calcd for  $\text{C}_{13}\text{H}_{16}\text{NS}^+$   $[\text{M}+\text{H}]^+$  218.0998, found 218.0996.

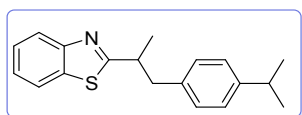

### 2-(1-(4-isopropylphenyl)propan-2-yl)benzo[d]thiazole (5f)

Following the general procedure, the crude product was purified by silica gel flash chromatography (PE: EA=200:1 as the eluent) to give **5f** (24 mg, 52% yield) as a yellow oil.

$^1\text{H}$  NMR (400 MHz,  $\text{CDCl}_3$ )  $\delta$  7.99 (d,  $J = 8.1$  Hz, 1H), 7.84 (d,  $J = 7.7$  Hz, 1H), 7.46 – 7.42 (m, 1H), 7.35 – 7.31 (m, 1H), 7.13 (s, 4H), 3.60 – 3.51 (m, 1H), 3.32 – 3.27 (m, 1H), 2.92 – 2.84 (m, 2H), 1.42 (d,  $J = 6.9$  Hz, 3H), 1.22 (d,  $J = 6.9$  Hz, 6H).

$^{13}\text{C}$  NMR (100 MHz,  $\text{CDCl}_3$ )  $\delta$  177.1, 153.1, 146.9, 136.5, 134.7, 129.0, 126.4, 125.8, 124.6, 122.6, 121.6, 43.0, 41.1, 33.7, 24.0, 20.3.

**HRMS (ESI):** Calcd for  $\text{C}_{19}\text{H}_{22}\text{NS}^+$   $[\text{M}+\text{H}]^+$  296.1467, found 296.1462.

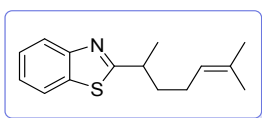

### 2-(6-methylhept-5-en-2-yl)benzo[d]thiazole (**5g**)

Following the general procedure, the crude product was purified by silica gel flash chromatography (PE: EA=200:1 as the eluent) to give **5g** (16 mg, 34% yield) as a yellow oil.

<sup>1</sup>H NMR (400 MHz, CDCl<sub>3</sub>) δ 7.98 (d, *J* = 8.1 Hz, 1H), 7.85 (d, *J* = 8.4 Hz, 1H), 7.46 – 7.42 (m, 1H), 7.35 – 7.31 (m, 1H), 5.12 (t, *J* = 7.1 Hz, 1H), 3.34 – 3.26 (m, 1H), 2.11 – 2.00 (m, 2H), 1.98 – 1.89 (m, 1H), 1.79 – 1.72 (m, 1H), 1.66 (s, 3H), 1.56 (s, 3H), 1.45 (d, *J* = 6.9 Hz, 3H).

<sup>13</sup>C NMR (100 MHz, CDCl<sub>3</sub>) δ 177.9, 153.1, 134.7, 132.3, 125.7, 124.5, 123.5, 122.6, 121.5, 39.0, 37.6, 25.8, 25.7, 21.2, 17.7.

HRMS (ESI): Calcd for C<sub>15</sub>H<sub>20</sub>NS<sup>+</sup> [M+H]<sup>+</sup> 246.1311, found 246.1307.

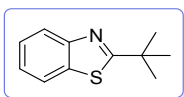

### 2-(tert-butyl)benzo[d]thiazole (**5h**)

Following the general procedure, the crude product was purified by silica gel flash chromatography (PE: EA=200:1 as the eluent) to give **5h** (23 mg, 63% yield) as a yellow oil.

<sup>1</sup>H NMR (400 MHz, CDCl<sub>3</sub>) δ 7.91 – 7.89 (m, 1H), 7.76 – 7.73 (m, 1H), 7.36 – 7.32 (m, 1H), 7.25 – 7.21 (m, 1H), 1.43 (s, 9H).

<sup>13</sup>C NMR (100 MHz, CDCl<sub>3</sub>) δ 181.8, 153.2, 134.9, 125.7, 124.5, 122.6, 121.4, 38.3, 30.7.

HRMS (ESI): Calcd for C<sub>11</sub>H<sub>14</sub>NS<sup>+</sup> [M+H]<sup>+</sup> 192.0841, found 192.0839.

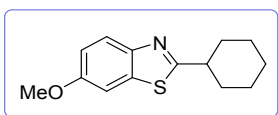

### 2-cyclohexyl-6-methoxybenzo[d]thiazole (**5i**)

Following the general procedure, the crude product was purified by silica gel flash chromatography (PE: EA=200:1 as the eluent) to give **5i** (45 mg, 90% yield) as a yellow oil.

**<sup>1</sup>H NMR** (400 MHz, CDCl<sub>3</sub>) δ 7.84 (d, *J* = 8.9 Hz, 1H), 7.30 (d, *J* = 2.5 Hz, 1H), 7.04 – 7.02 (m, 1H), 3.85 (s, 3H), 3.08 – 3.01 (m, 1H), 2.20 – 2.16 (m, 2H), 1.89 – 1.85 (m, 2H), 1.77 – 1.72 (m, 1H), 1.66 – 1.56 (m, 2H), 1.48 – 1.37 (m, 2H), 1.35 – 1.24 (m, 1H).

**<sup>13</sup>C NMR** (100 MHz, CDCl<sub>3</sub>) δ 175.0, 157.2, 147.6, 135.7, 122.9, 114.9, 104.3, 55.7, 43.3, 33.4, 26.0, 25.8.

**HRMS (ESI)**: Calcd for C<sub>14</sub>H<sub>18</sub>NOS<sup>+</sup> [M+H]<sup>+</sup> 248.1104, found 248.1098.

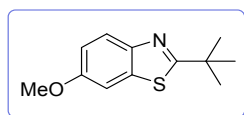

### 2-(tert-butyl)-6-methoxybenzo[d]thiazole (**5j**)

Following the general procedure, the crude product was purified by silica gel flash chromatography (PE: EA=200:1 as the eluent) to give **5j** (39 mg, 88% yield) as a yellow oil.

**<sup>1</sup>H NMR** (400 MHz, CDCl<sub>3</sub>) δ 7.86 (d, *J* = 8.9 Hz, 1H), 7.30 (d, *J* = 2.3 Hz, 1H), 7.04 – 7.02 (m, 1H), 3.85 (s, 3H), 1.50 (s, 9H).

**<sup>13</sup>C NMR** (100 MHz, CDCl<sub>3</sub>) δ 179.2, 157.2, 147.7, 136.2, 123.1, 114.8, 104.1, 55.7, 38.1, 30.7.

**HRMS (ESI)**: Calcd for C<sub>12</sub>H<sub>16</sub>NOS<sup>+</sup> [M+H]<sup>+</sup> 222.0947, found 222.0941.

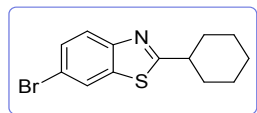

### 6-bromo-2-cyclohexylbenzo[d]thiazole (**5k**)

Following the general procedure, the crude product was purified by silica gel flash chromatography (PE: EA=200:1 as the eluent) to give **5k** (33 mg, 56% yield) as a yellow solid.

**<sup>1</sup>H NMR** (400 MHz, CDCl<sub>3</sub>) δ 8.11 (d, *J* = 1.8 Hz, 1H), 7.69 (d, *J* = 8.5 Hz, 1H), 7.44 (dd, *J* = 8.5, 1.8 Hz, 1H), 3.12 – 3.05 (m, 1H), 2.20 – 2.17 (m, 2H), 1.90 – 1.86 (m, 2H), 1.78 – 1.74 (m, 1H), 1.69 – 1.57 (m, 2H), 1.49 – 1.38 (m, 2H), 1.36 – 1.28 (m, 1H).

**<sup>13</sup>C NMR** (100 MHz, CDCl<sub>3</sub>) δ 178.4, 153.3, 132.3, 126.5, 124.4, 121.5, 118.3, 42.4, 32.3, 24.9, 24.7.

**HRMS (ESI):** Calcd for C<sub>13</sub>H<sub>15</sub>BrNS<sup>+</sup> [M+H]<sup>+</sup> 296.0103, found 296.0099.

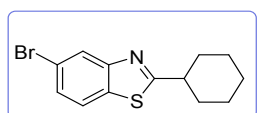

### 5-bromo-2-cyclohexylbenzo[d]thiazole (**5l**)

Following the general procedure, the crude product was purified by silica gel flash chromatography (PE: EA=200:1 as the eluent) to give **5l** (29 mg, 55% yield) as a yellow solid.

**<sup>1</sup>H NMR** (400 MHz, CDCl<sub>3</sub>) δ 7.97 (d, *J* = 1.9 Hz, 1H), 7.81 (d, *J* = 8.7 Hz, 1H), 7.53 (dd, *J* = 8.7, 1.9 Hz, 1H), 3.11 – 3.03 (m, 1H), 2.21 – 2.17 (m, 2H), 1.90 – 1.86 (m, 2H), 1.78 – 1.74 (m, 1H), 1.67 – 1.60 (m, 2H), 1.49 – 1.38 (m, 2H), 1.36 – 1.28 (m, 1H).

**<sup>13</sup>C NMR** (100 MHz, CDCl<sub>3</sub>) δ 178.4, 153.3, 132.3, 126.5, 124.4, 121.5, 118.3, 42.4, 32.3, 24.9, 24.7.

**HRMS (ESI):** Calcd for C<sub>13</sub>H<sub>15</sub>BrNS<sup>+</sup> [M+H]<sup>+</sup> 296.0103, found 296.0099.

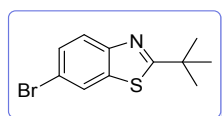

### 6-bromo-2-(tert-butyl)benzo[d]thiazole (**5m**)

Following the general procedure, the crude product was purified by silica gel flash chromatography (PE: EA=200:1 as the eluent) to give **5m** (30 mg, 55% yield) as a yellow oil.

**<sup>1</sup>H NMR** (400 MHz, CDCl<sub>3</sub>) δ 7.97 (d, *J* = 1.9 Hz, 1H), 7.83 (d, *J* = 8.7 Hz, 1H), 7.54 – 7.52 (m, 1H), 1.51 (s, 9H).

**<sup>13</sup>C NMR** (100 MHz, CDCl<sub>3</sub>) δ 182.4, 152.1, 136.7, 129.2, 123.9, 123.8, 117.9, 38.4, 30.6.

HRMS (ESI): Calcd for  $C_{11}H_{13}BrNS^+$   $[M+H]^+$  296.9947, found 296.9943.

### 3. Scale-up Synthesis

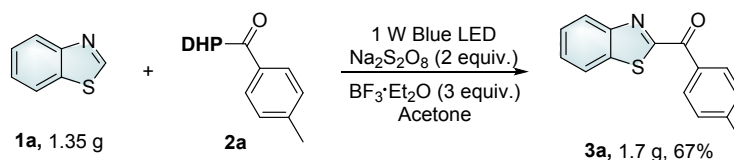

The 50 mL glass bottle was charged with benzothiazole (**1a**, 10 mmol, 1.35 g), acyl-DHP reagent (**2a**, 20 mmol, 7.43 g),  $Na_2S_2O_8$  (2.0 equiv., 4.76 g), and  $BF_3 \cdot Et_2O$  (3.0 equiv., 4.26 g) in acetone (10 mL), and the reaction mixture was stirred at blue LED (25 W) for 20 hours. After completion, 50 mL water was added and the mixture was extracted with 50 mL ethyl acetate for three times. The combined organic layer was dried over  $Na_2SO_4$  and then evaporated under reduced pressure. After evaporating the solvent under reduced pressure, the crude product was purified by column chromatography using petroleum ether/ethyl acetate as the eluents. The product was obtained as a yellow solid (1.7 g, 67%).

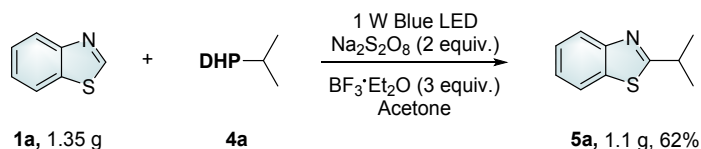

The 50 mL glass bottle was charged with benzothiazole (**1a**, 10 mmol, 1.35 g), alkyl-DHP reagent (**4a**, 20 mmol, 5.91 g),  $Na_2S_2O_8$  (2.0 equiv., 4.76 g), and  $BF_3 \cdot Et_2O$  (3.0 equiv., 4.26 g) in acetone (10 mL), and the reaction mixture was stirred at blue LED (25 W) for 15 hours. After completion, 50 mL water was added and the mixture was extracted with 50 mL ethyl acetate for three times. The combined organic layer was dried over  $Na_2SO_4$  and then evaporated under reduced pressure. After evaporating the solvent under reduced pressure, the crude product was purified by column chromatography using petroleum ether/ethyl acetate as the eluents. The product was obtained as a yellow oil. (1.1 g, 62%).



## 4. Synthetic Application

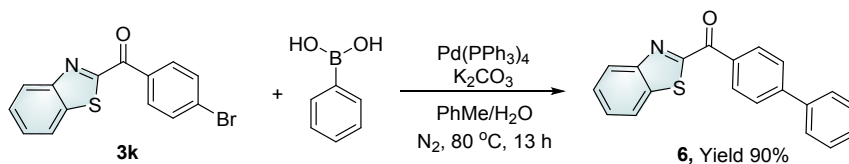

Under nitrogen atmosphere, **3k** (0.3 mmol, 95.46 mg), phenylboronic acid (0.45 mmol, 54.87 mg), tetrakis(triphenylphosphine)palladium (0.015 mmol, 1.73 mg), potassium carbonate (1.2 mmol, 165.85 mg), toluene (1 mL) and water (0.2 mL) were added successively to a 10 mL reaction flask. The mixture was stirred at  $80\text{ }^\circ\text{C}$  for 8 hours. The mixture was cooled to room temperature. Then 20 mL water was added to the mixture and extracted with 20 mL ethyl acetate for three times. The combined organic layer was dried over  $\text{Na}_2\text{SO}_4$  and then evaporated under reduced pressure. The residue was purified by flash chromatography on silica gel (petroleum ether: ethyl acetate = 20:1). Compound **6** was obtained as yellow solid (85 mg, 90%).

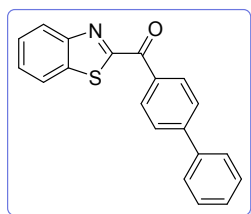

### [1,1'-biphenyl]-4-yl(benzo[d]thiazol-2-yl)methanone (**6**)

$^1\text{H NMR}$  (400 MHz,  $\text{CDCl}_3$ )  $\delta$  8.63 (d,  $J = 8.2$  Hz, 2H), 8.23 (d,  $J = 8.1$  Hz, 1H), 7.96 (d,  $J = 7.9$  Hz, 1H), 7.73 (d,  $J = 8.2$  Hz, 2H), 7.63 (d,  $J = 7.7$  Hz, 2H), 7.56 – 7.42 (m, 2H), 7.45 (t,  $J = 7.7$  Hz, 2H), 7.38 (t,  $J = 7.1$  Hz, 1H).

$^{13}\text{C NMR}$  (100 MHz,  $\text{CDCl}_3$ )  $\delta$  184.8, 167.3, 153.9, 146.5, 139.9, 137.0, 133.7, 131.9, 129.0, 128.4, 127.6, 127.4, 127.2, 126.9, 125.7, 122.2.

**HRMS (ESI)**: Calcd for  $\text{C}_{20}\text{H}_{14}\text{NOS}^+$   $[\text{M}+\text{H}]^+$  316.0791, found 316.0795.

## 5. Control Experiment

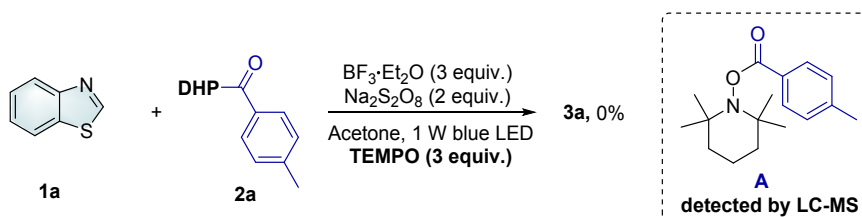

The 5 mL glass bottle was charged with benzothiazole (**1a**, 0.2 mmol), acyl-DHP reagent (**2a**, 0.4 mmol, 149 mg),  $\text{BF}_3 \cdot \text{Et}_2\text{O}$  (3.0 equiv., 85 mg),  $\text{Na}_2\text{S}_2\text{O}_8$  (2.0 equiv., 92 mg) and TEMPO (3.0 equiv., 94 mg) in acetone (1 mL), and the reaction mixture was stirred at blue LED for 15 hours. According to the detected result by LC-MS, the benzoyl radical could be trapped by TEMPO to produce the 1-(*p*-toluoyl)-2,2,6,6-tetramethylpiperidine (**A**).

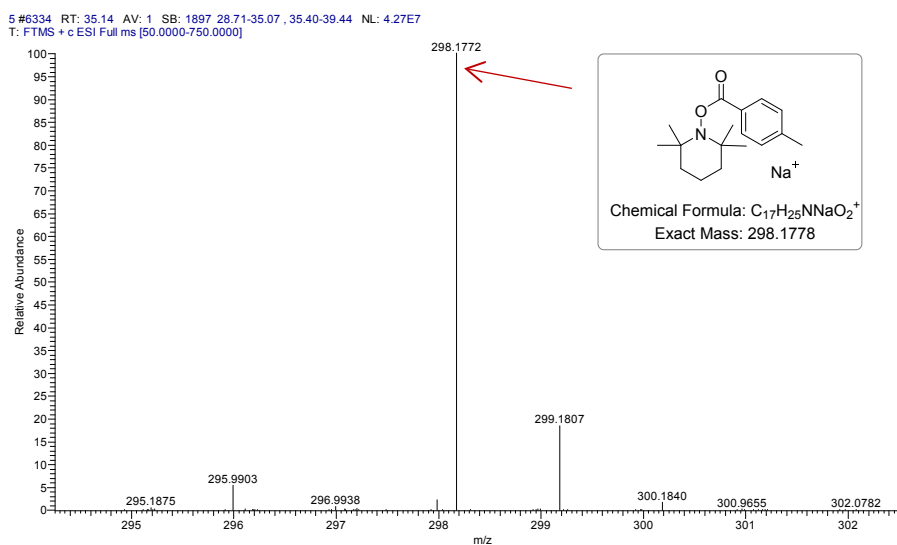

**HRMS (ESI):** Calcd for  $\text{C}_{17}\text{H}_{25}\text{NNaO}_2^+$   $[\text{M}+\text{Na}]^+$  298.1778, found 298.1772.

## 6. UV-VIS Absorption Spectra

Solutions of **2a** ( $[\mathbf{2a}] = 0.15$  mM in  $\text{CH}_3\text{COH}_3$ ) were introduced into a 1 cm path length quartz cuvette equipped with a Teflon® septum (Figure S4). Solutions at different concentrations of **2a**, obtained by opportunely diluting an original stock solution ( $[\mathbf{2a}] = 0.3$  mM in  $\text{CH}_3\text{COH}_3$ ), were introduced to a 1 cm path length quartz

cuvette (Figure S5). The solution was analyzed using a Shimadzu 2501 PC UV-VIS spectrophotometer. The absorption spectra show a typical Lambert-Beer linear correlation with the concentrations (Figure S6). Ultraviolet-visible spectroscopy (UV-VIS) measurements were conducted. No obvious change of the absorption was observed when different components were mixed under standard reaction conditions (Figure S7).

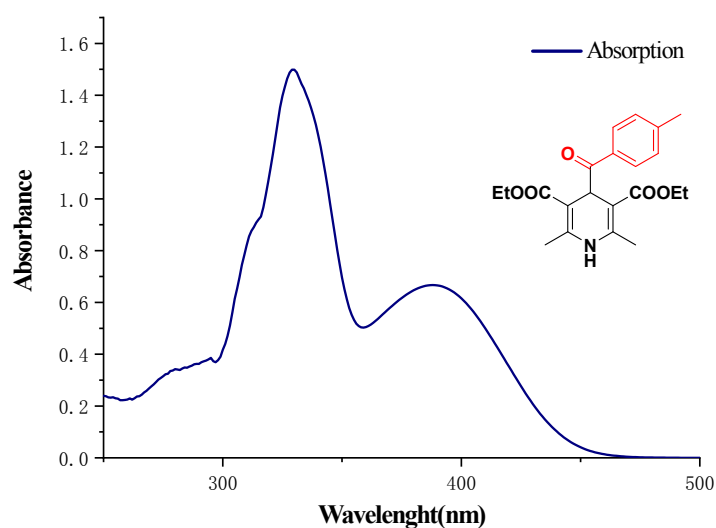

**Figure S4** Absorption spectrum of **2a** in  $\text{CH}_3\text{COCH}_3$

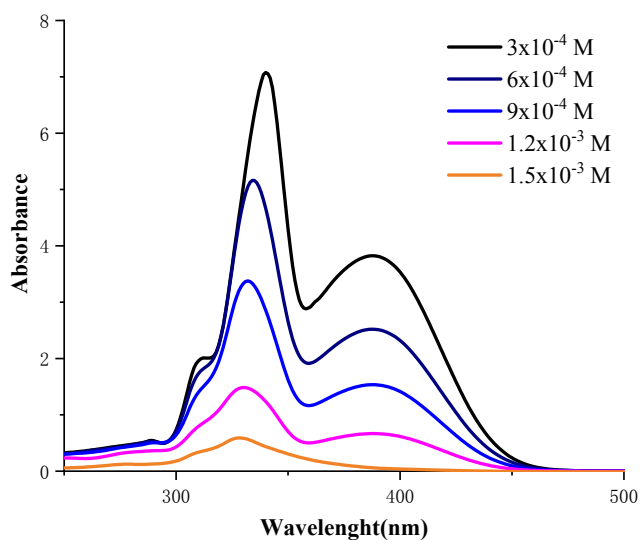

**Figure S5.** Absorption spectra of **2a** at different concentrations in  $\text{CH}_3\text{COCH}_3$ . The tail wavelength of absorption was considered at 475 nm.

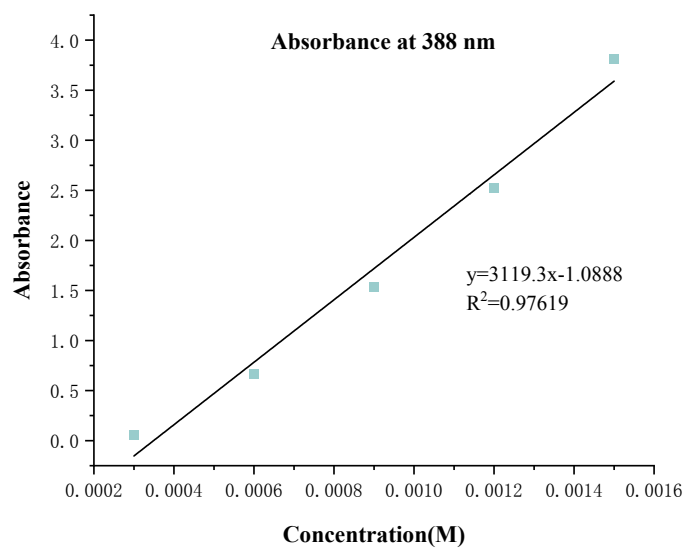

**Figure S6.** Lambert-Beer linear correlation between absorbance and concentration at 388 nm for **2a**. The slope of the line is the molar extinction coefficient  $\epsilon$  at 388 nm ( $M^{-1} \text{ cm}^{-1}$ ).

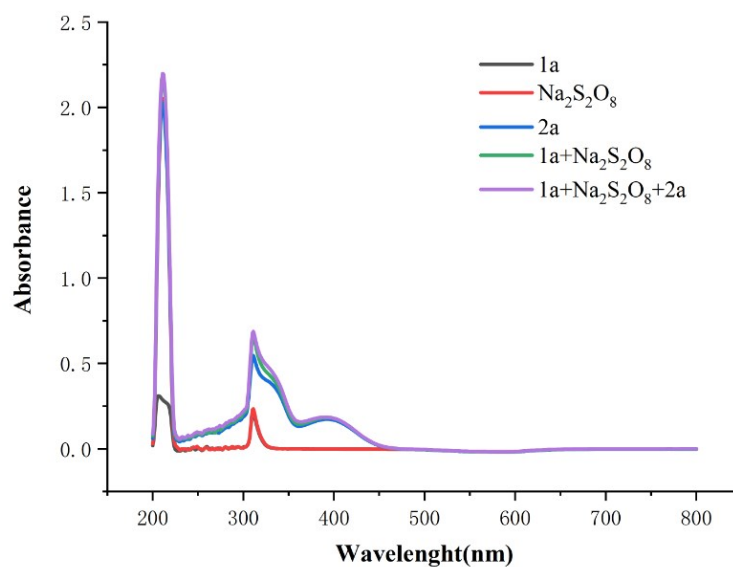

**Figure S7** Spectroscopic studies UV-VIS absorption spectra ( $\lambda = 465 \text{ nm}$ ;  $\text{CH}_3\text{COCH}_3/\text{H}_2\text{O} = 1/1$ ;  $C=0.2 \text{ mM}$ )

## 7. References

- [1] Á. Gutiérrez-Bonet, C. Remeur, J. K. Matsui, G. A. Molander, *J. Am. Chem. Soc.*, 2017, **139**, 12251-12258.
- [2] Á. Gutiérrez-Bonet, J. C. Tellis, J. K. Matsui, B. A. Vara, G. A. Molander, *ACS catal.*, 2016, **6**, 8004-8008.
- [3] J. P. Phelan, S. B. Lang, J. Sim, S. Berritt, A. J. Peat, K. Billings, L. Fan, G. A. Molander, *J. Am. Chem. Soc.*, 2019, **141**, 3723-3732.
- [4] G. Li, R. Chen, L. Wu, Q. Fu, X. Zhang, Z. Tang, *Angew. Chem., Int. Ed.*, 2013, **52**, 8432-8436.
- [5] B. Bieszczad, L. A. Perego, P. Melchiorre, *Angew. Chem., Int. Ed.*, 2019, **58**, 16878-16883.
- [6] G. Goti, B. Bieszczad, A. Vega-Peñaloza, P. Melchiorre, *Angew. Chem., Int. Ed.*, 2019, **58**, 1213-1217.

## 8. <sup>1</sup>H NMR and <sup>13</sup>C NMR Spectra of the Products

3a

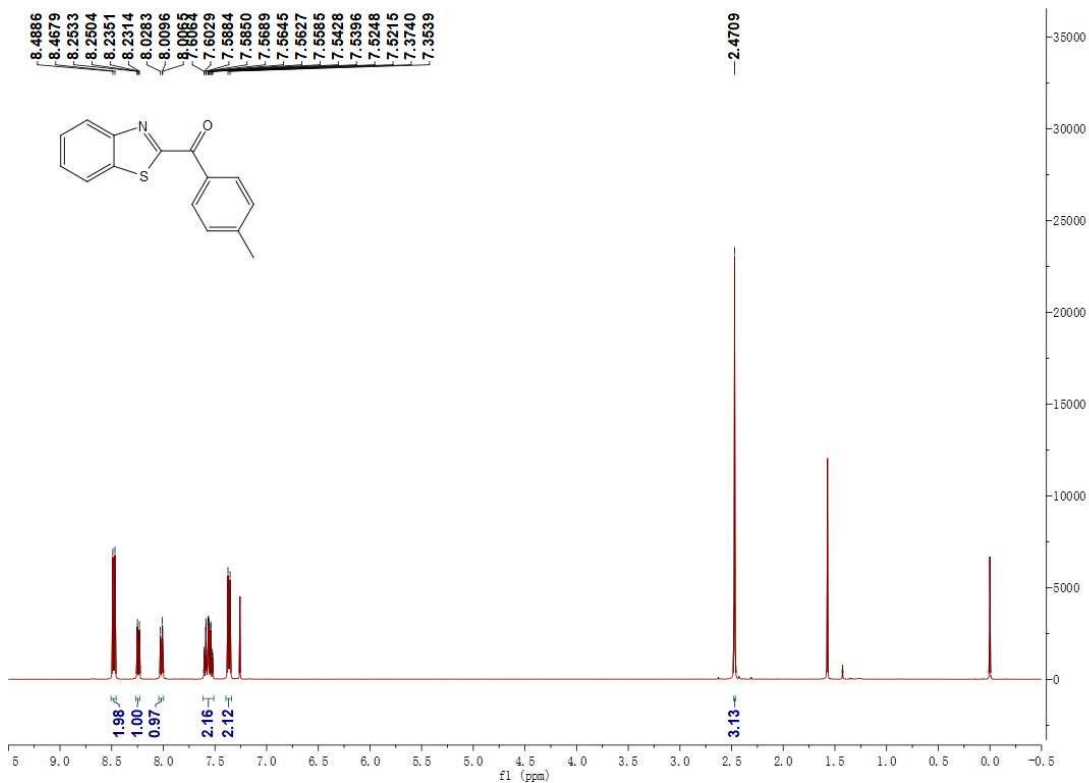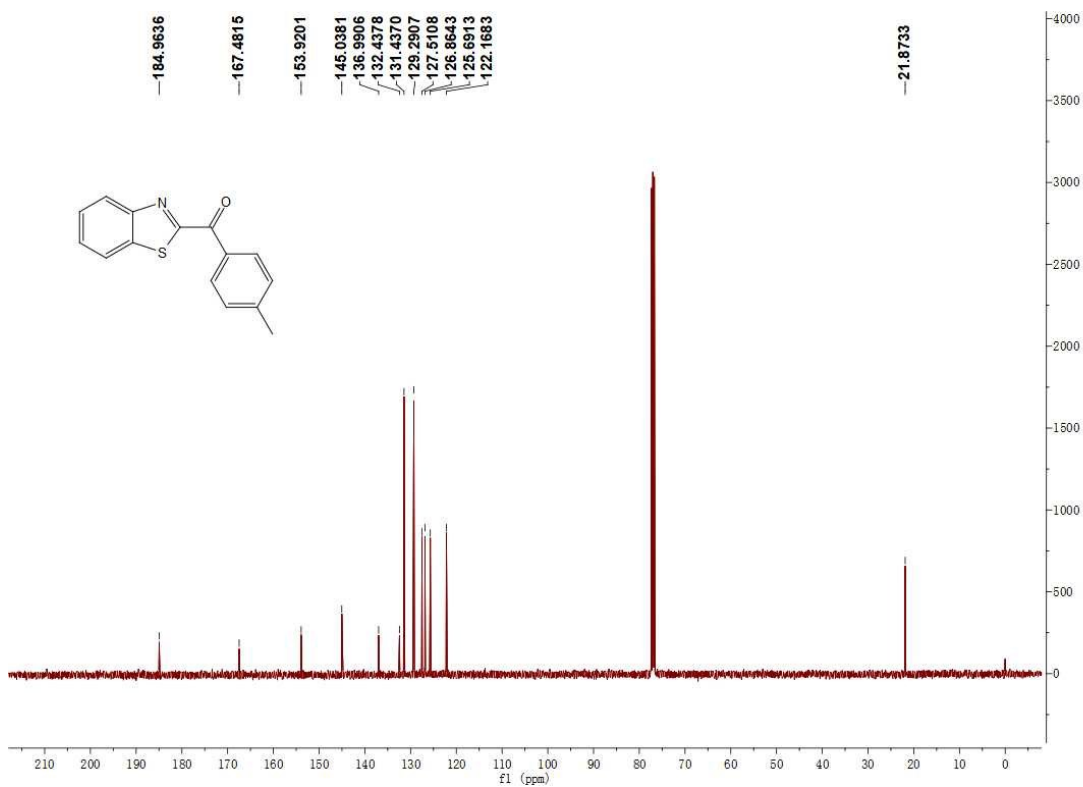

3b

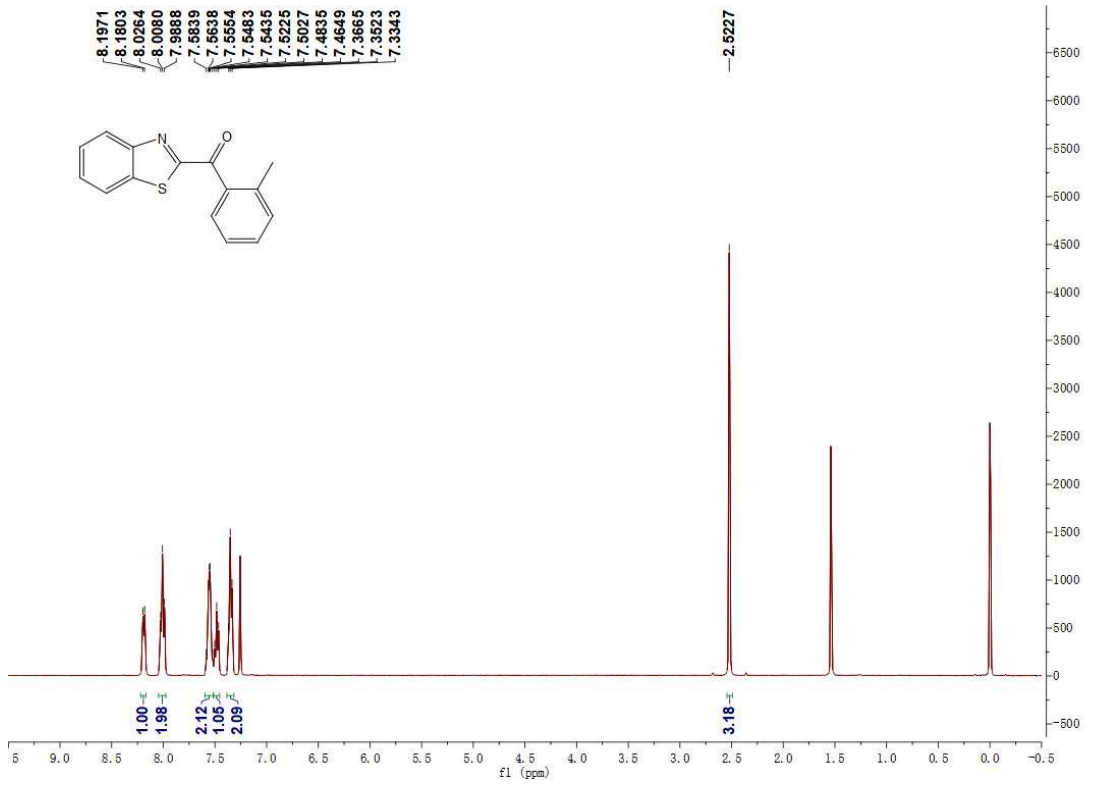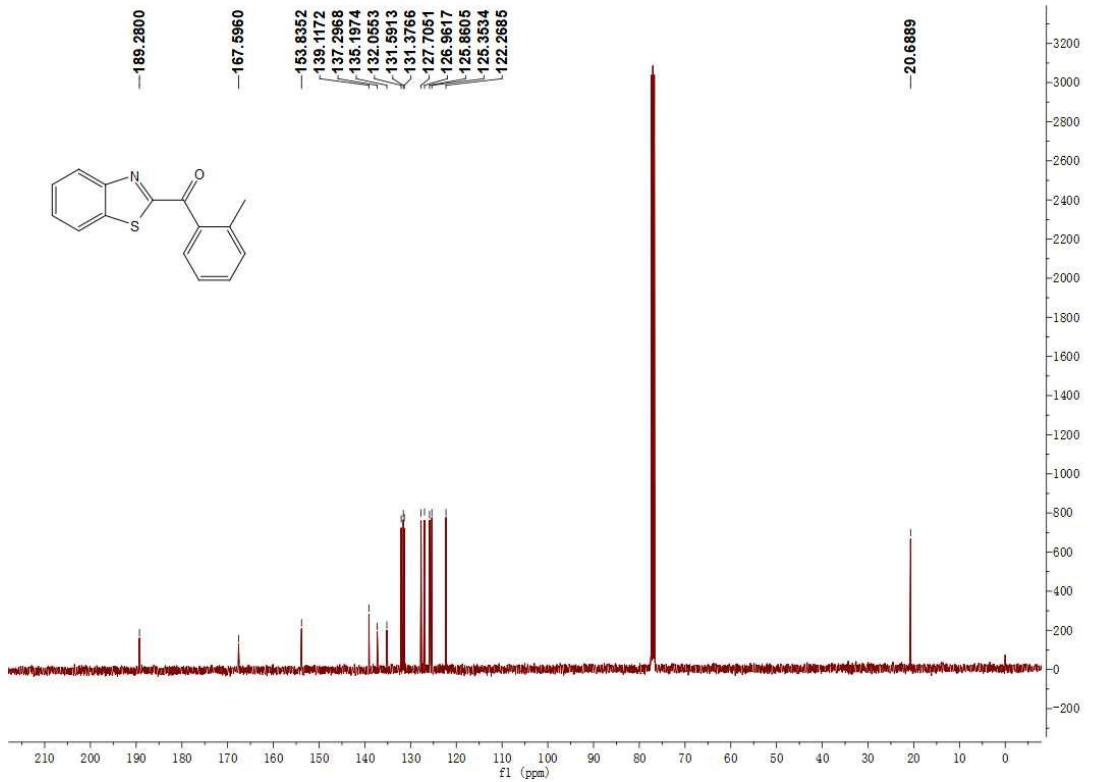

3c

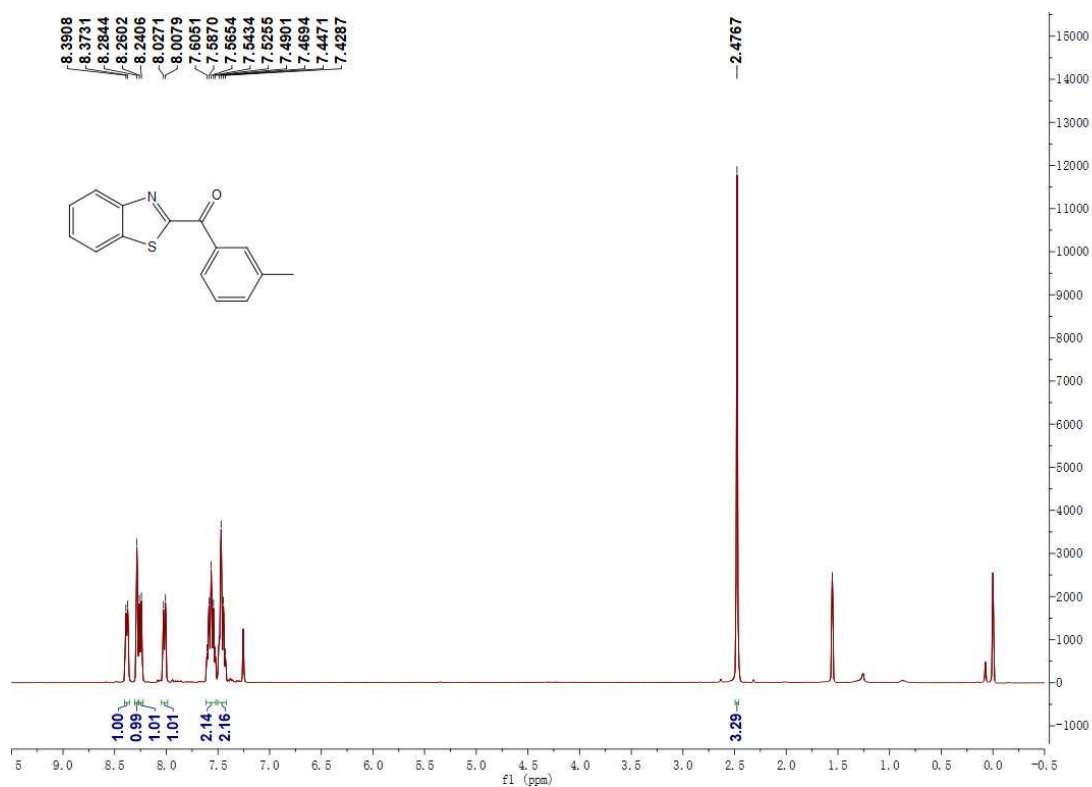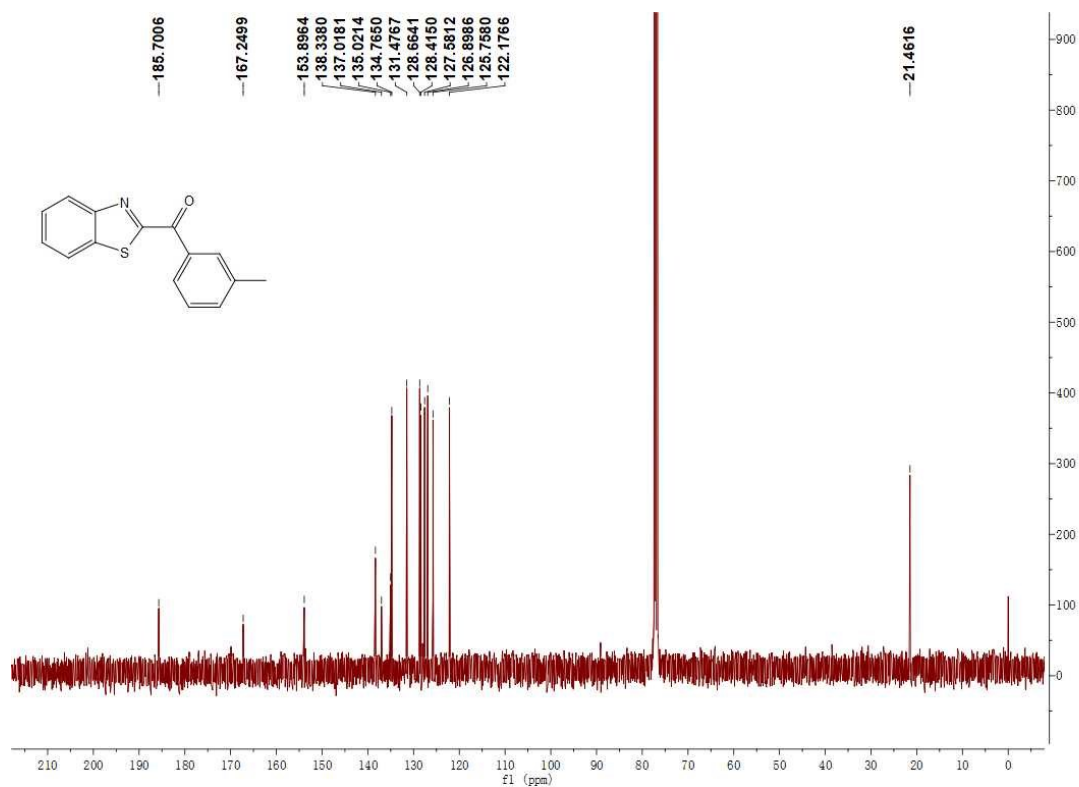



3d

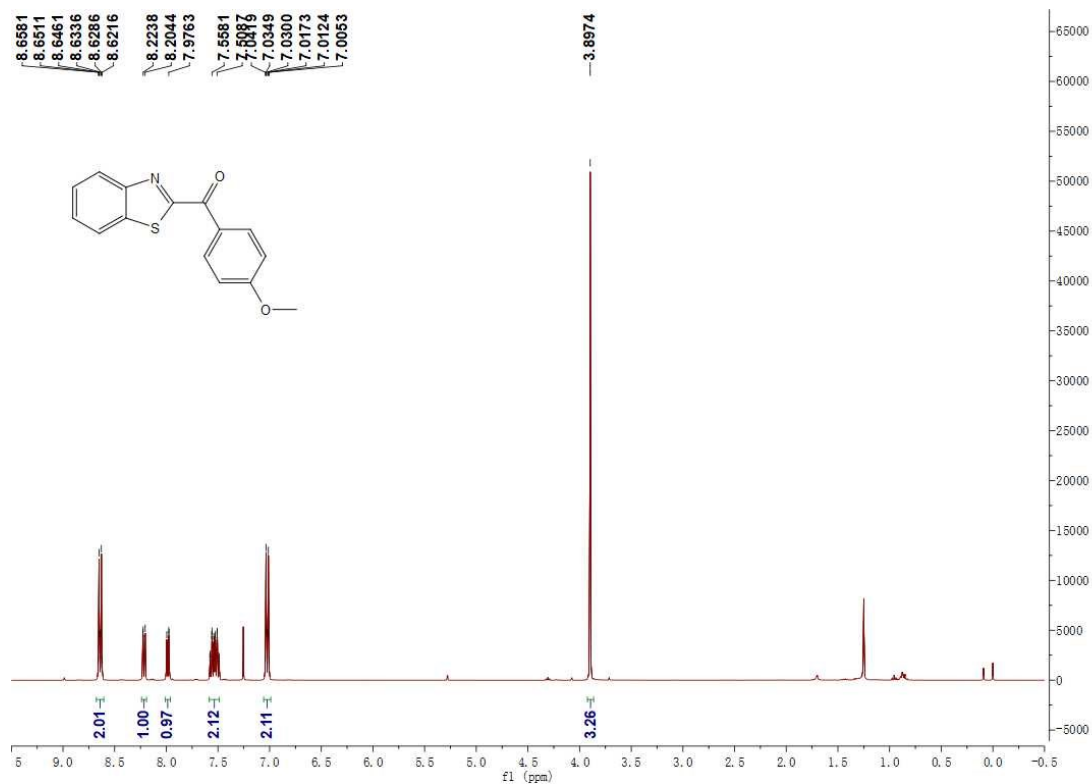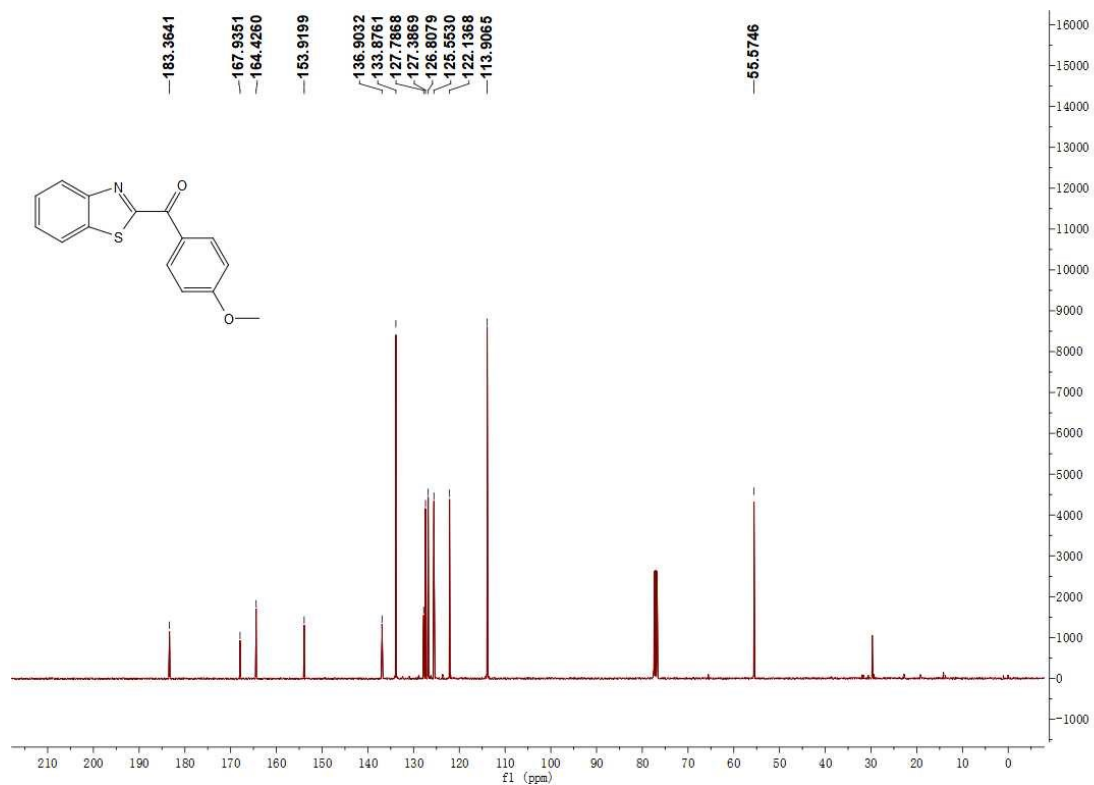

3e

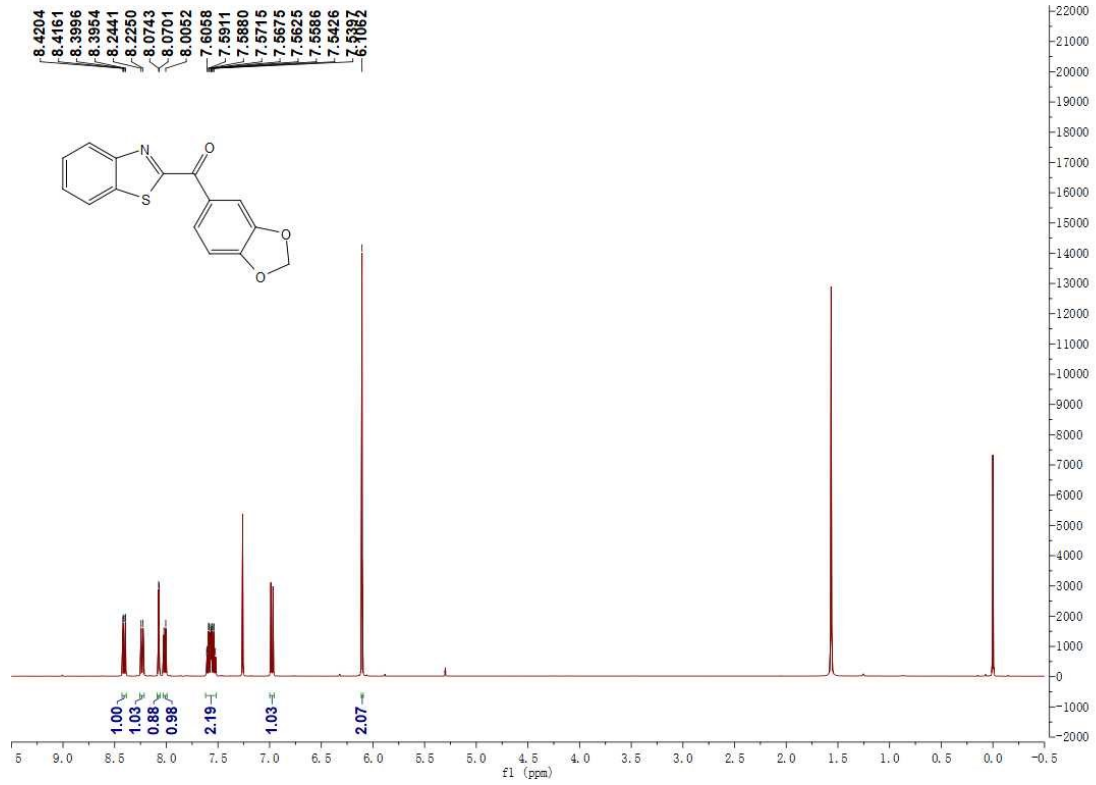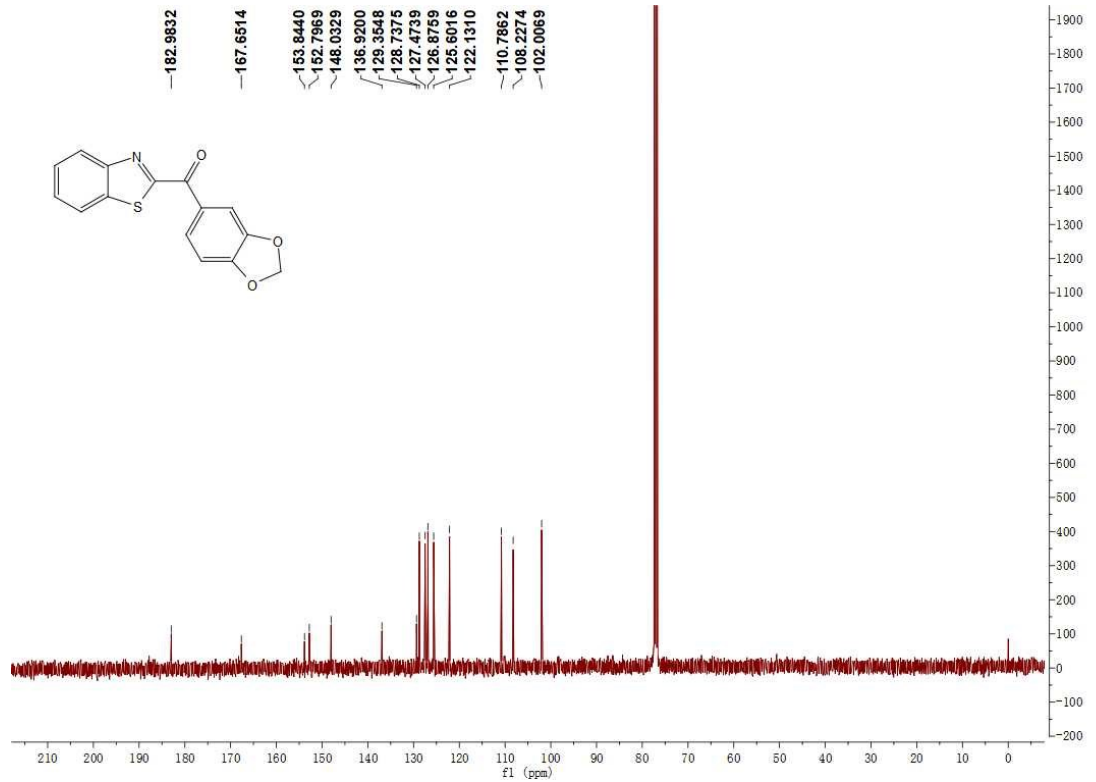

3f

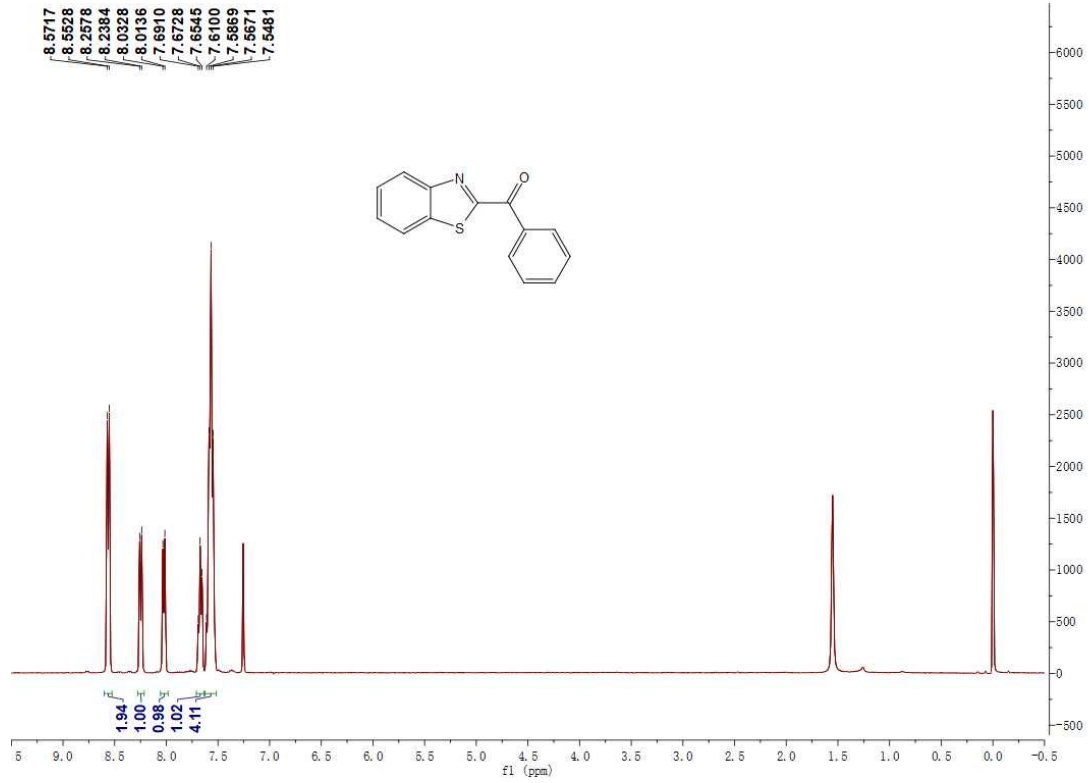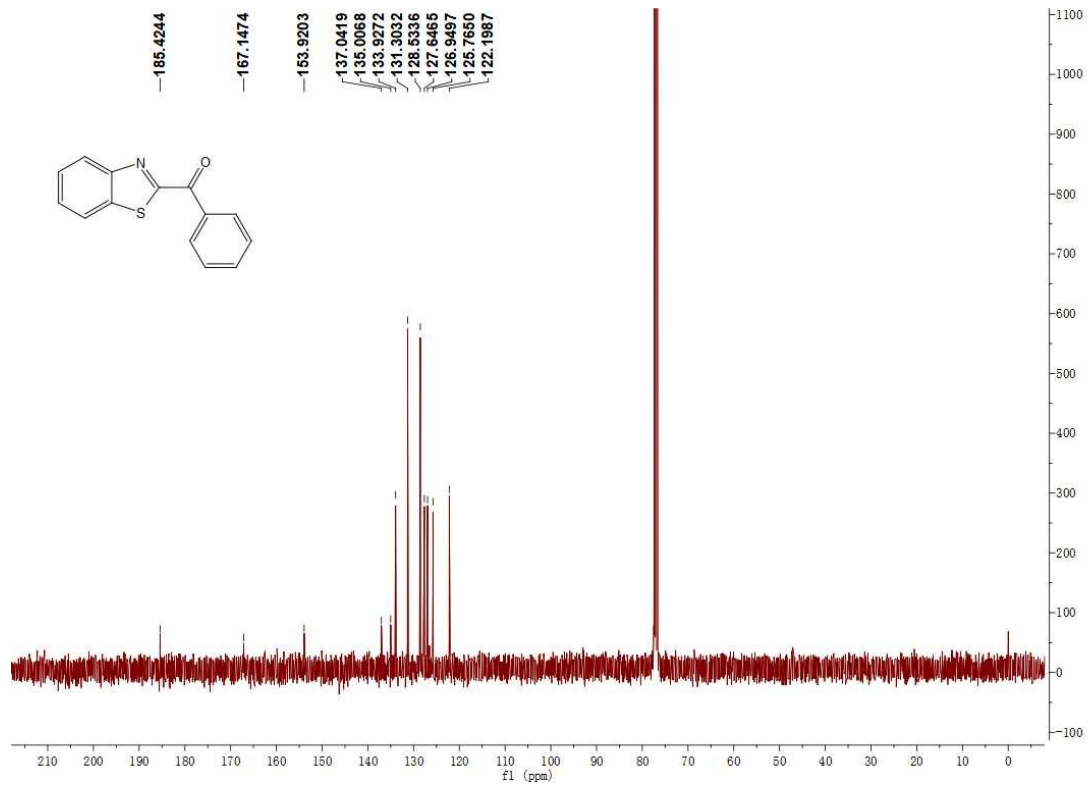

3g

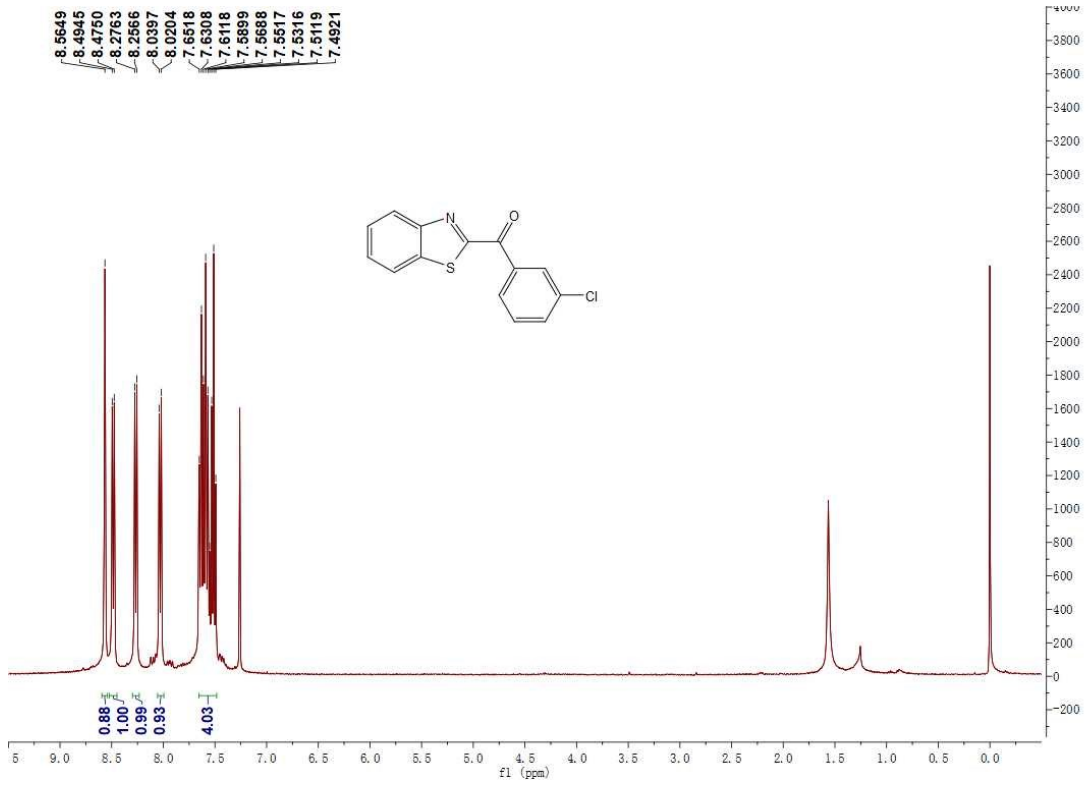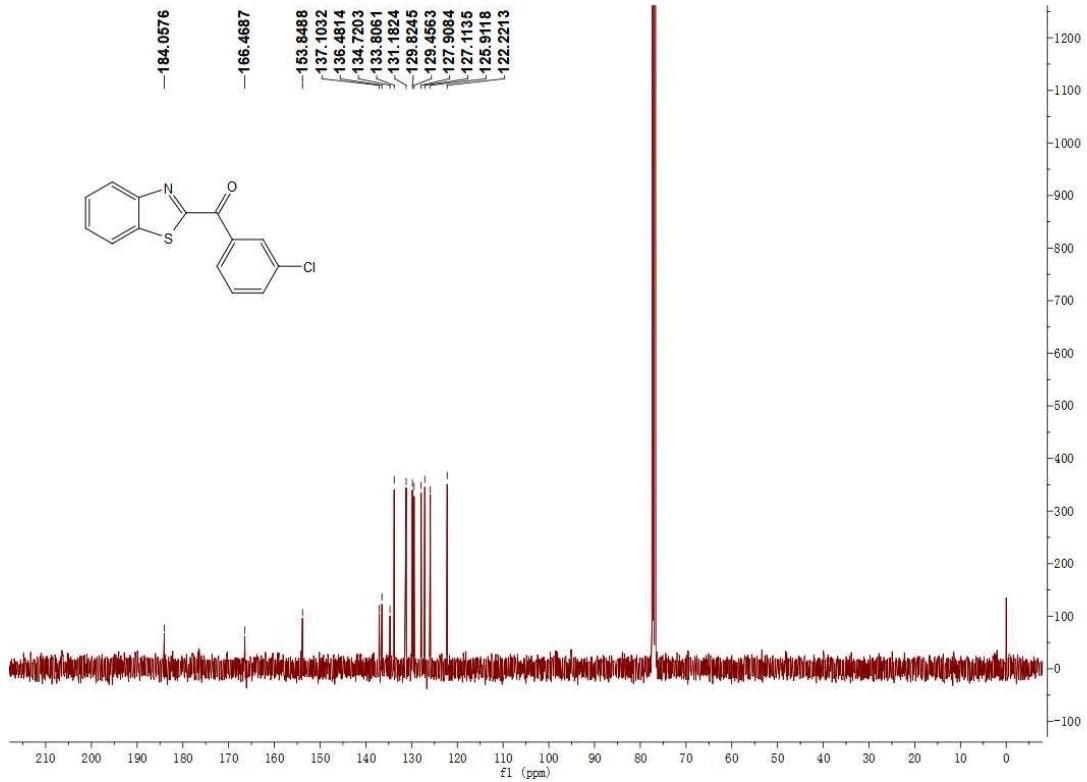

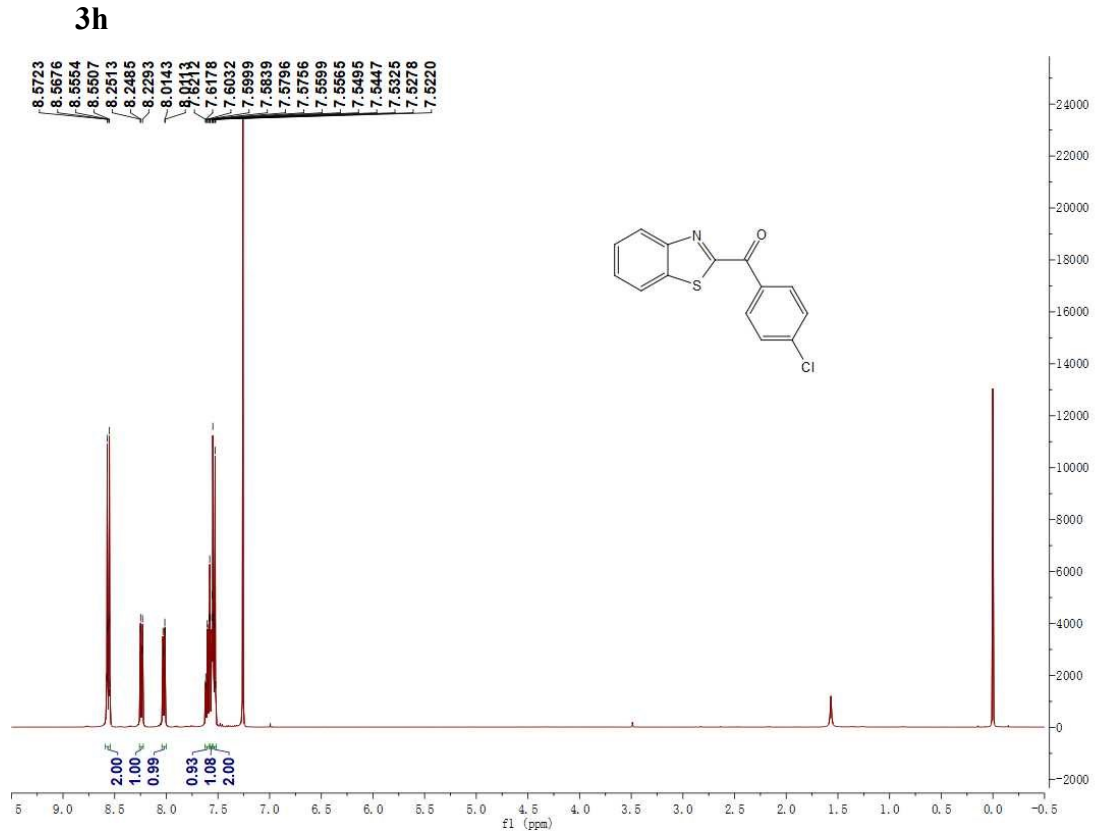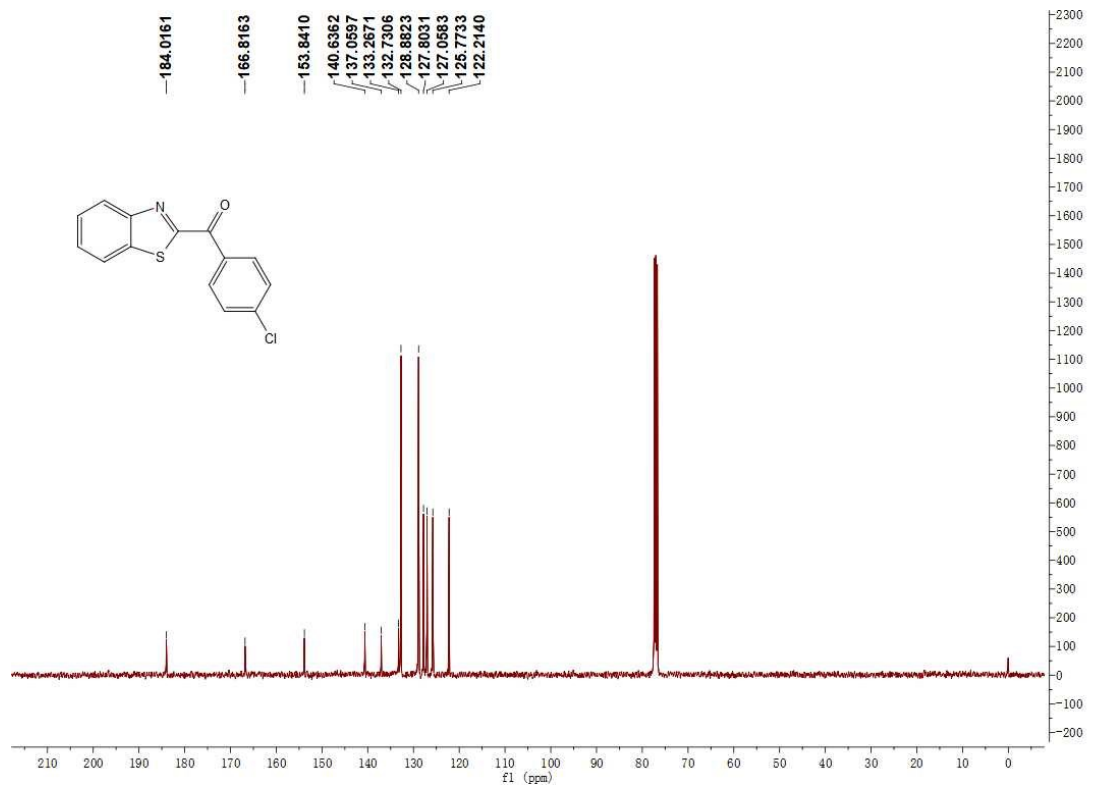

3i

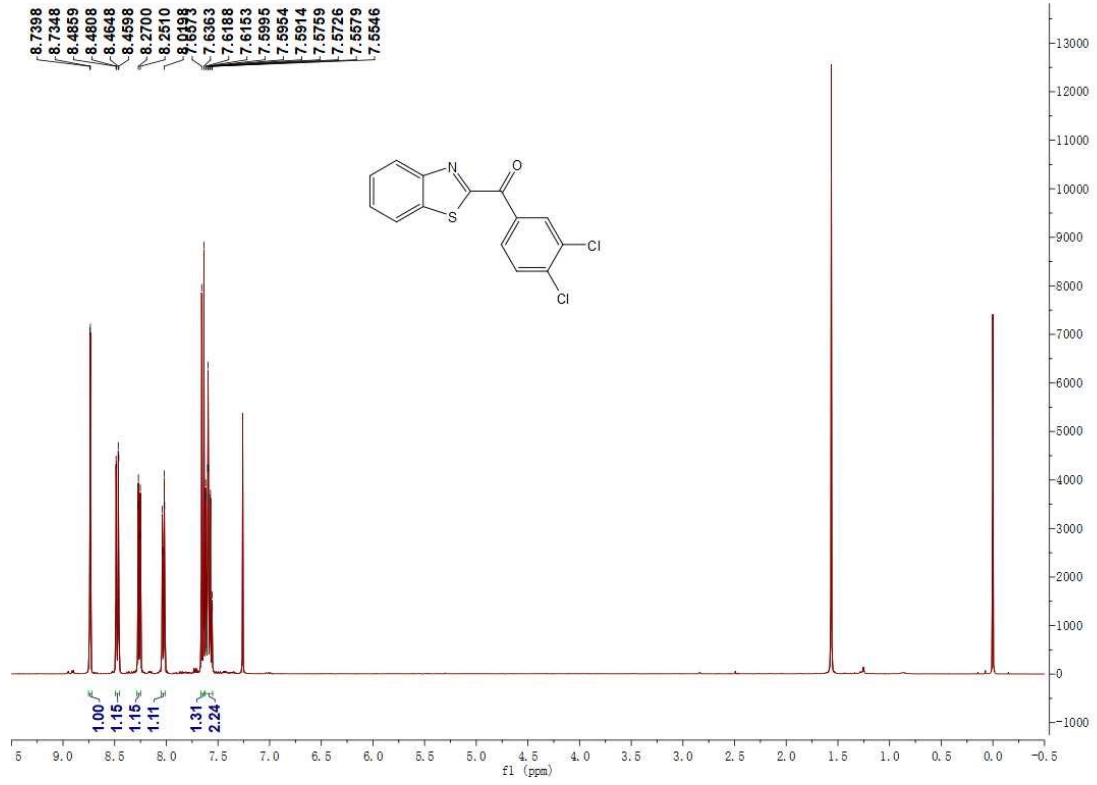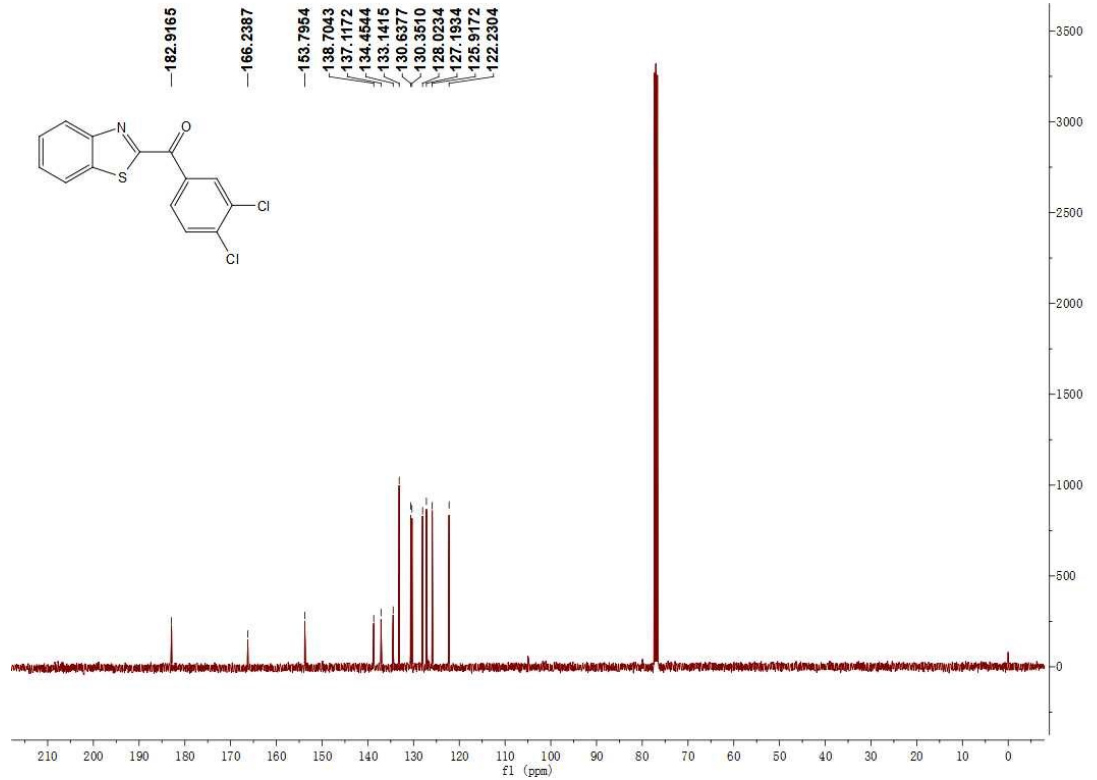

3j

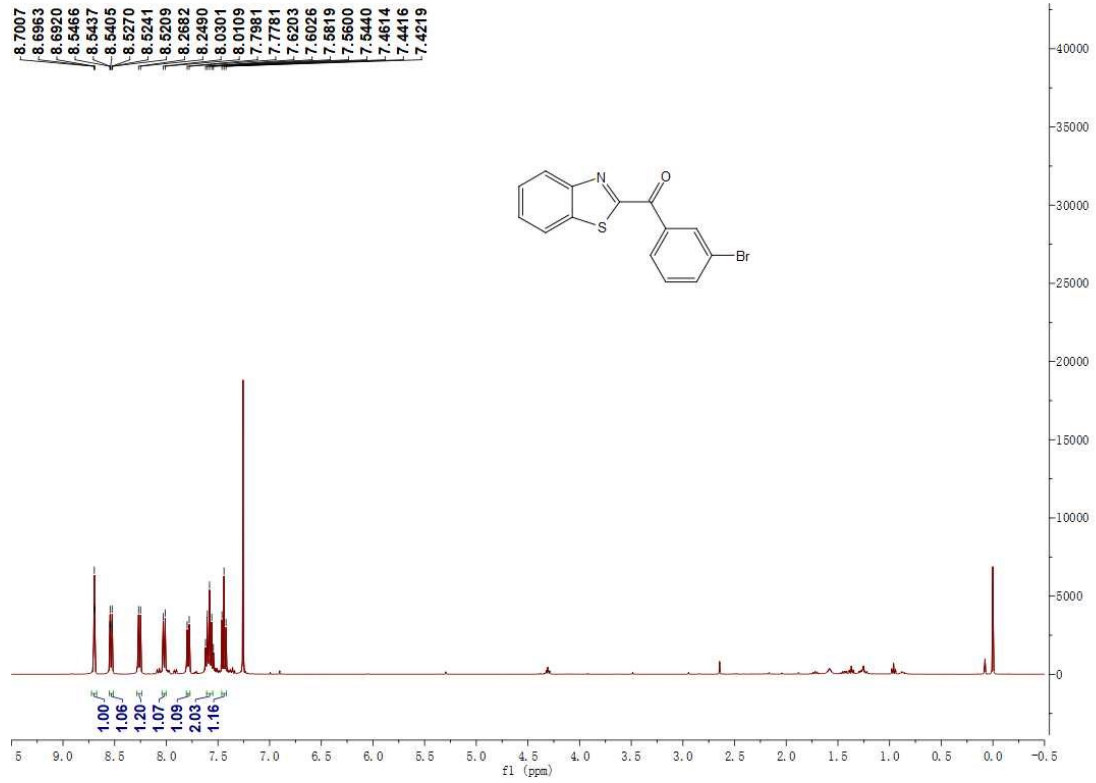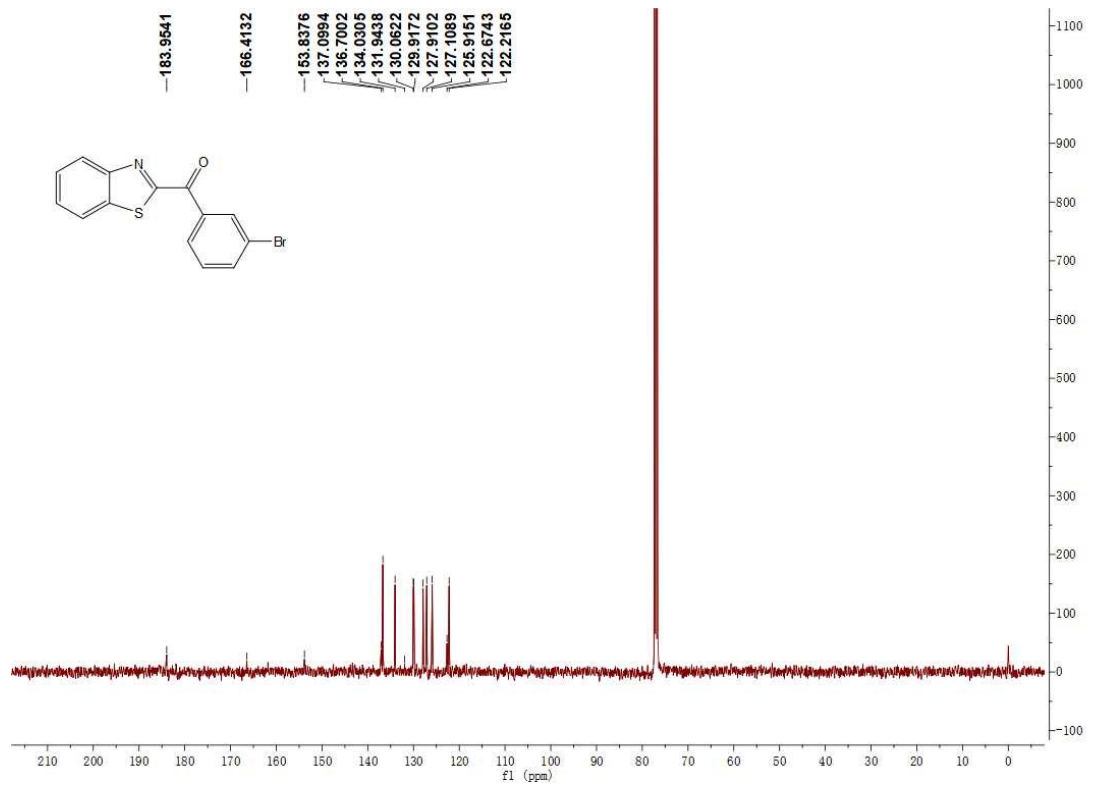

3k

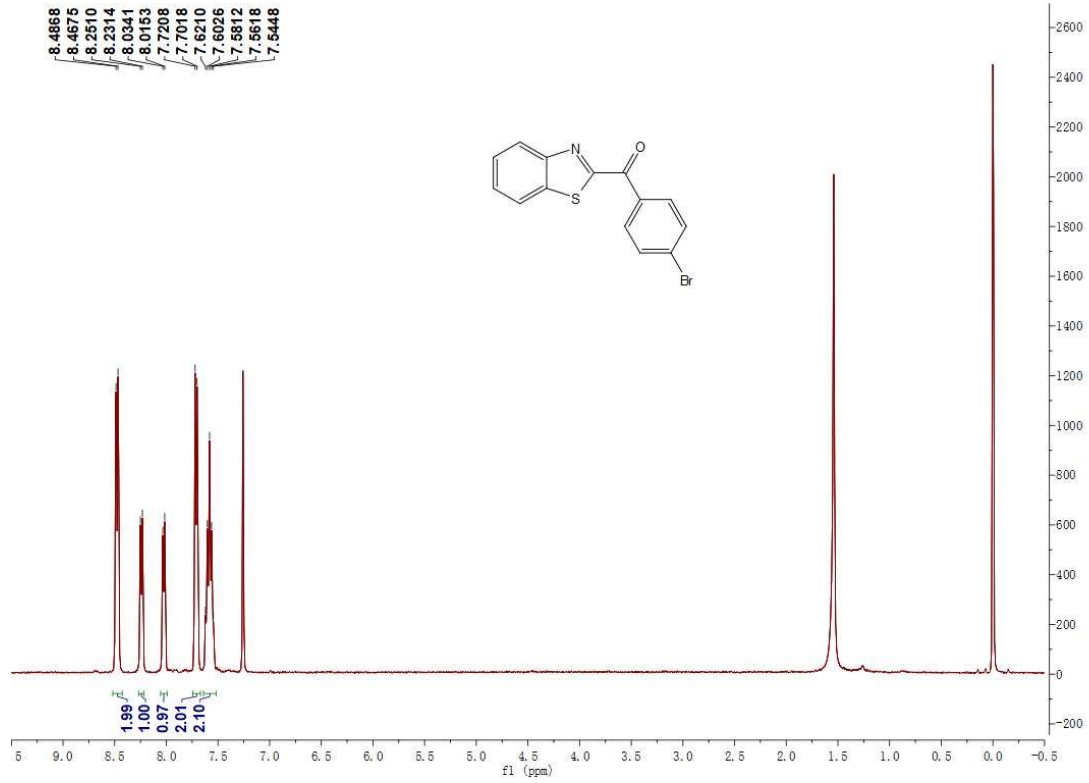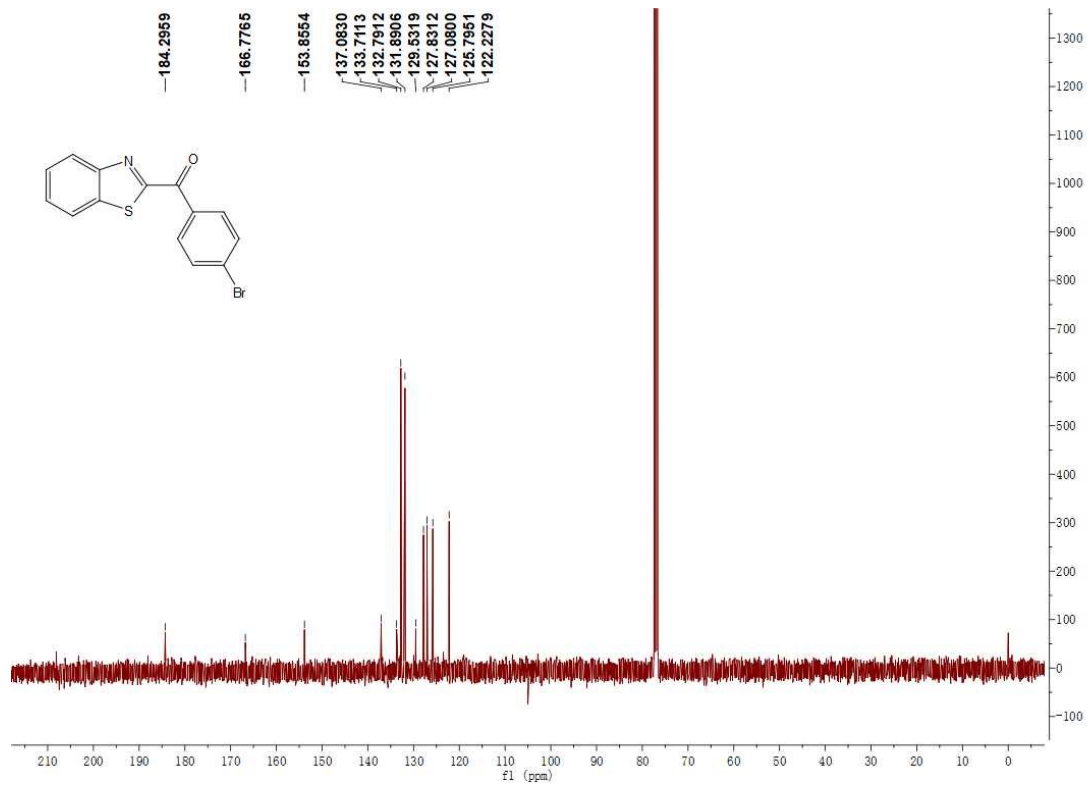



31

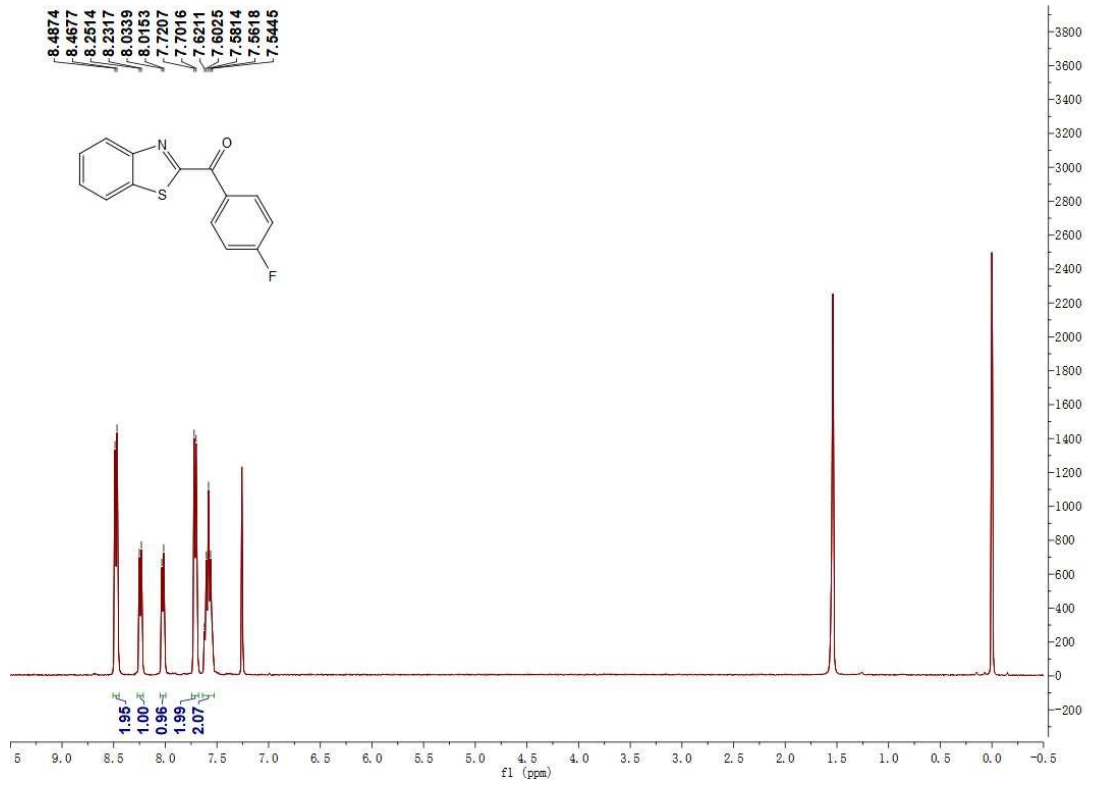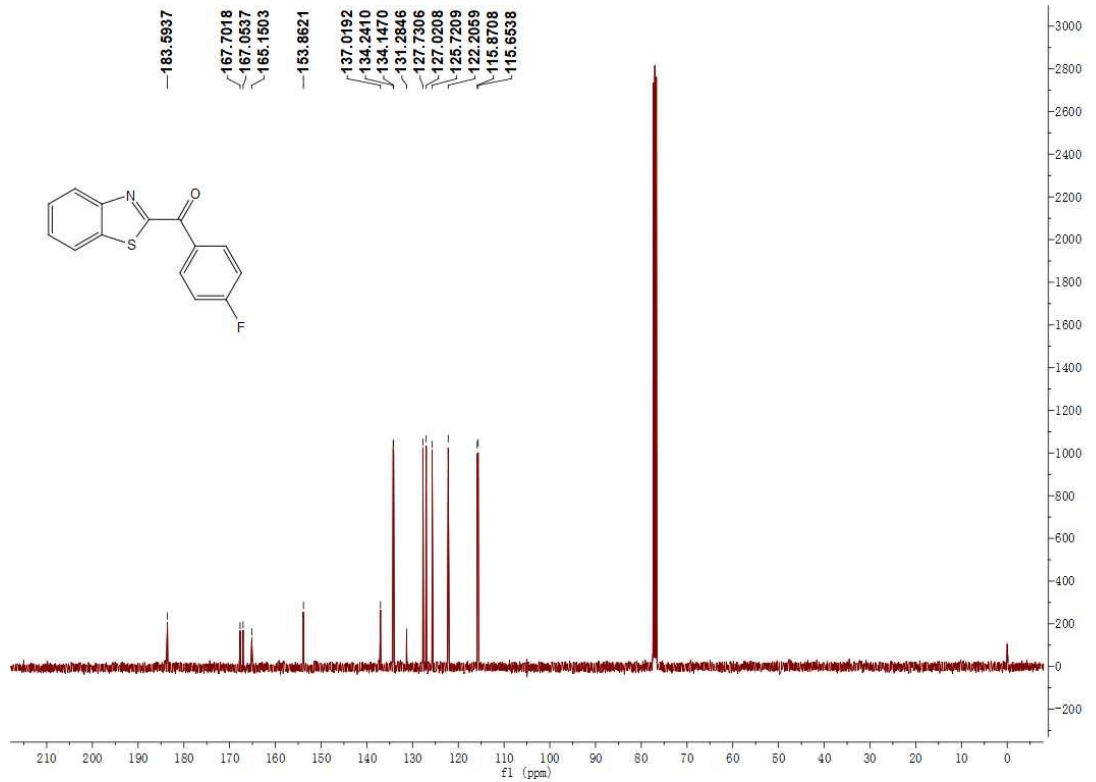

3m

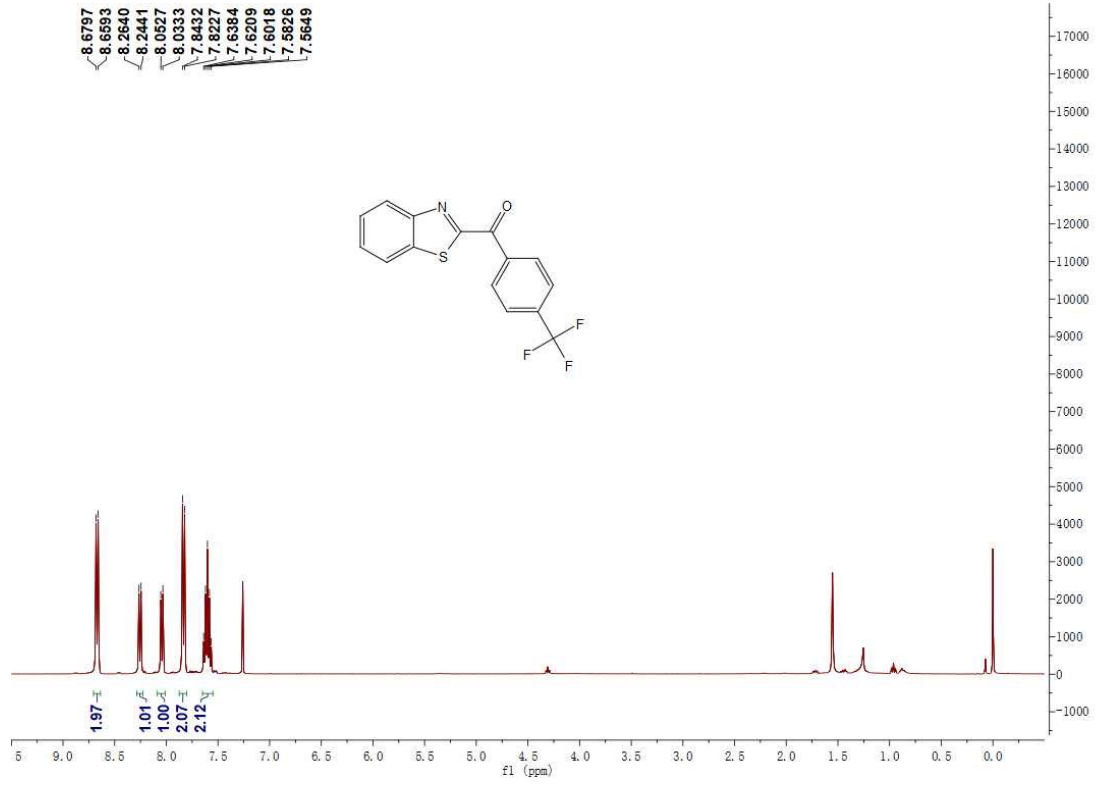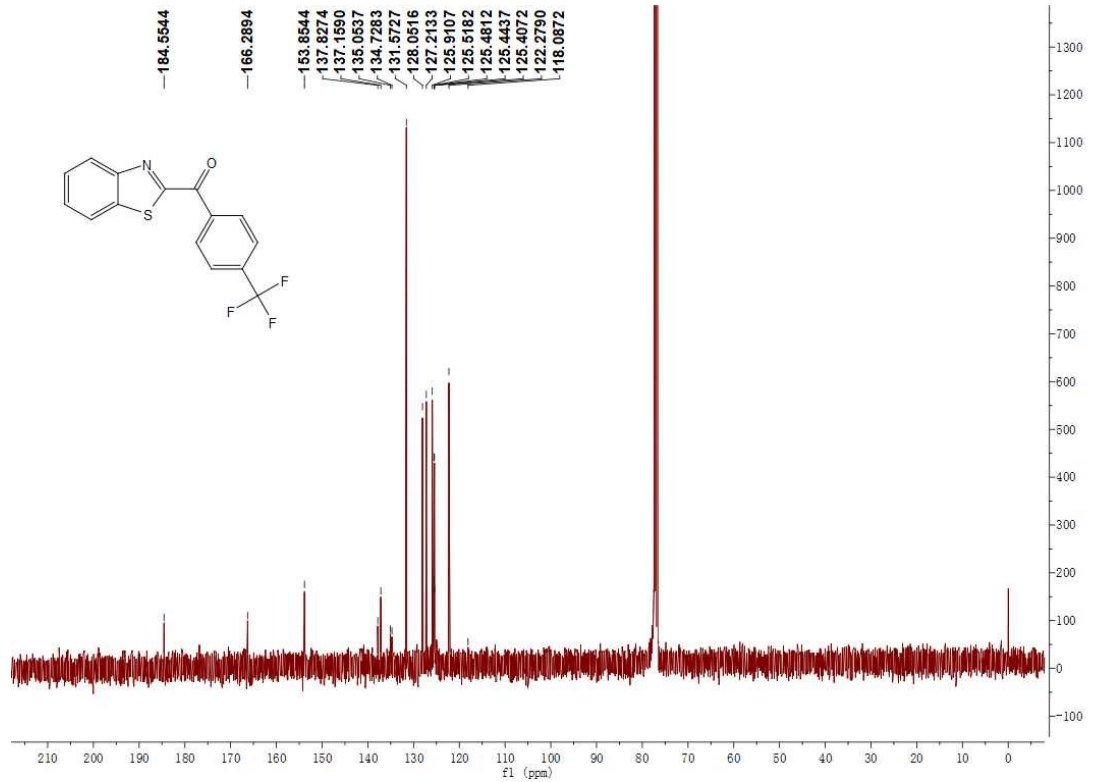

3n

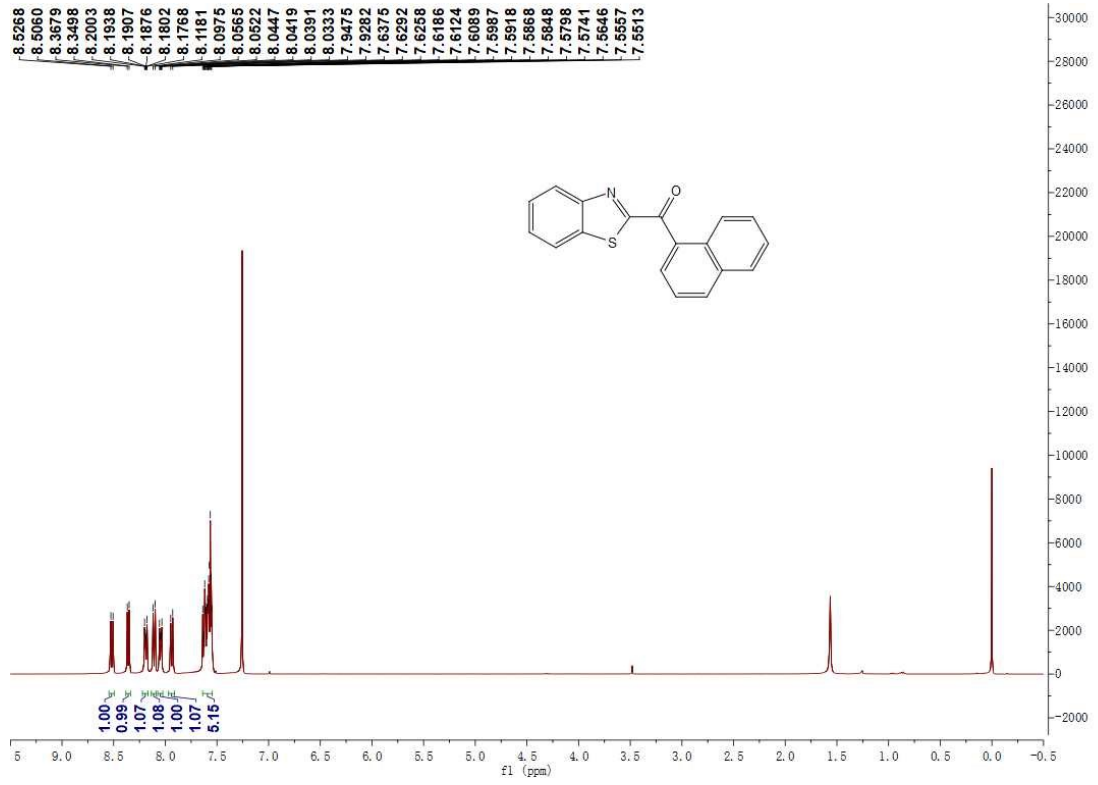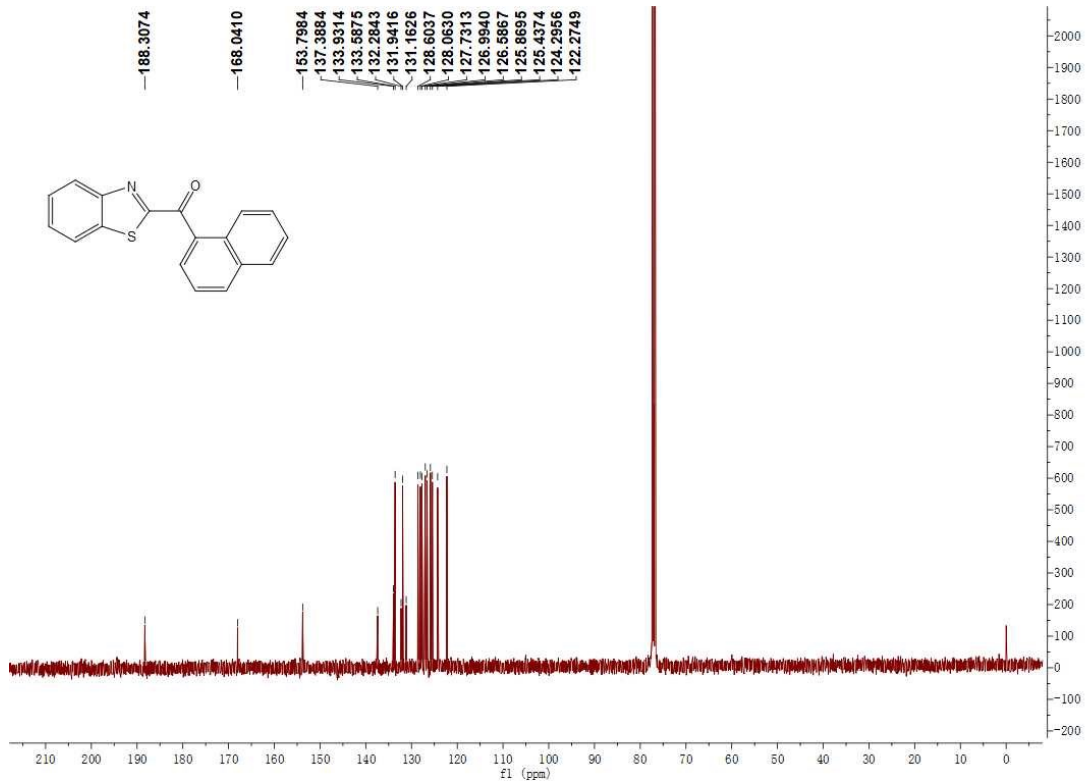

30

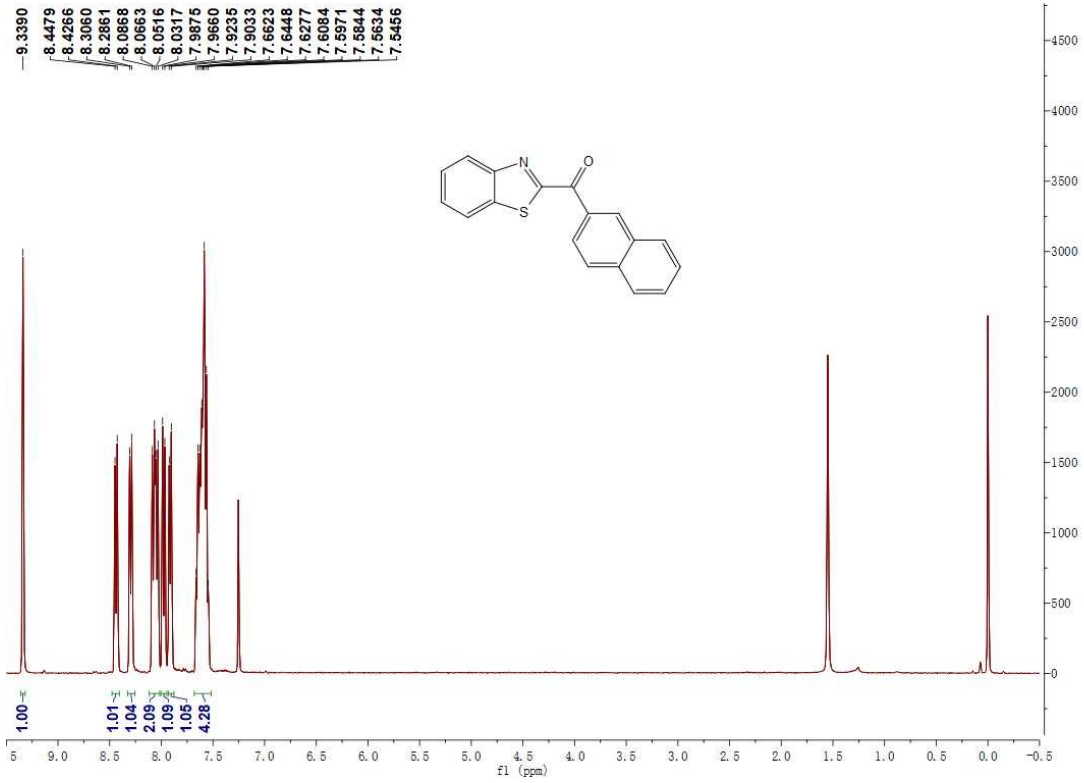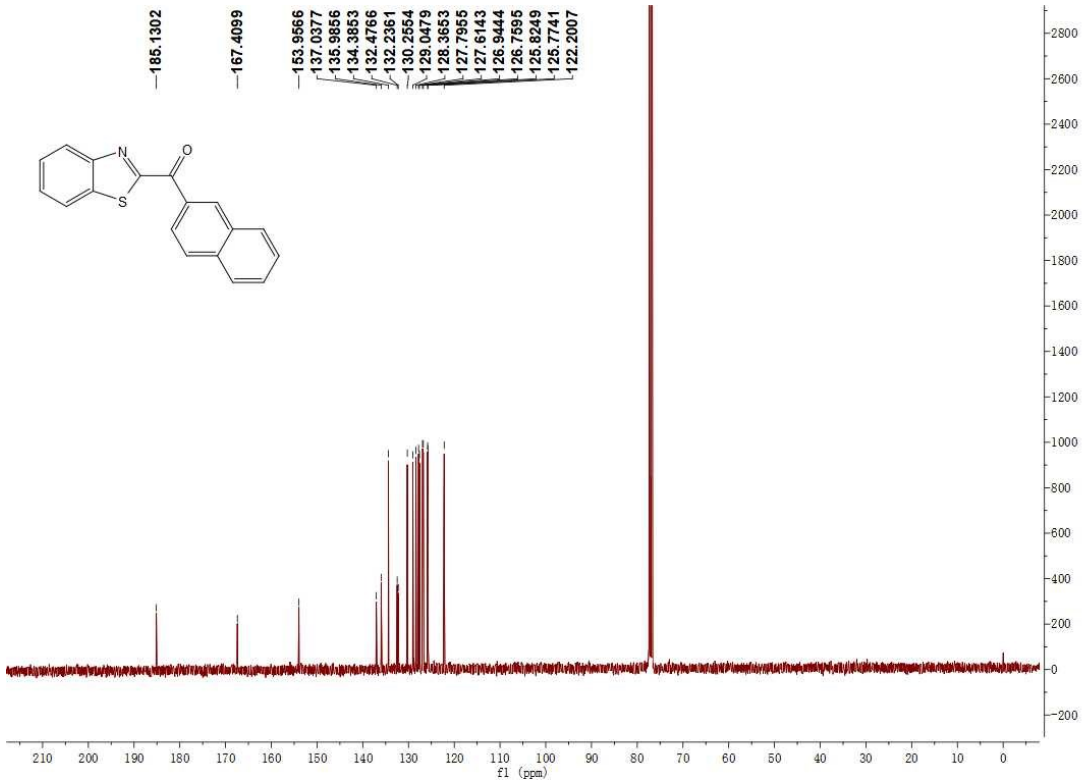

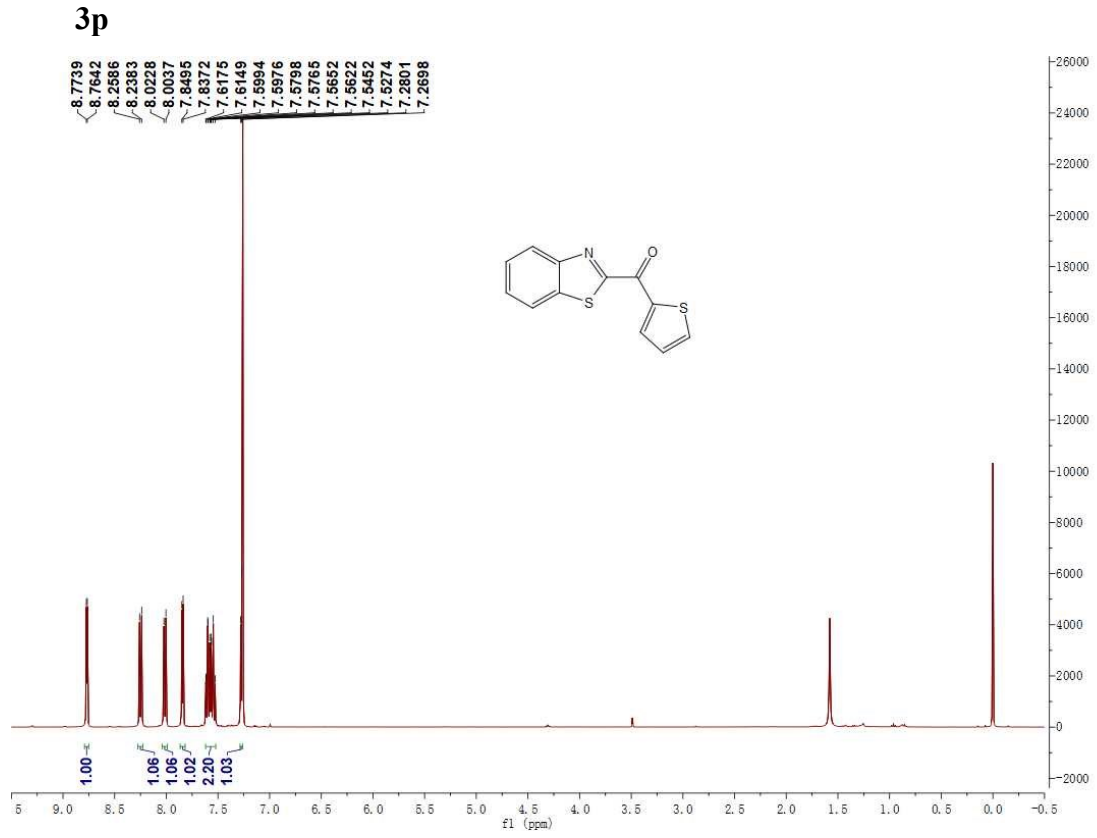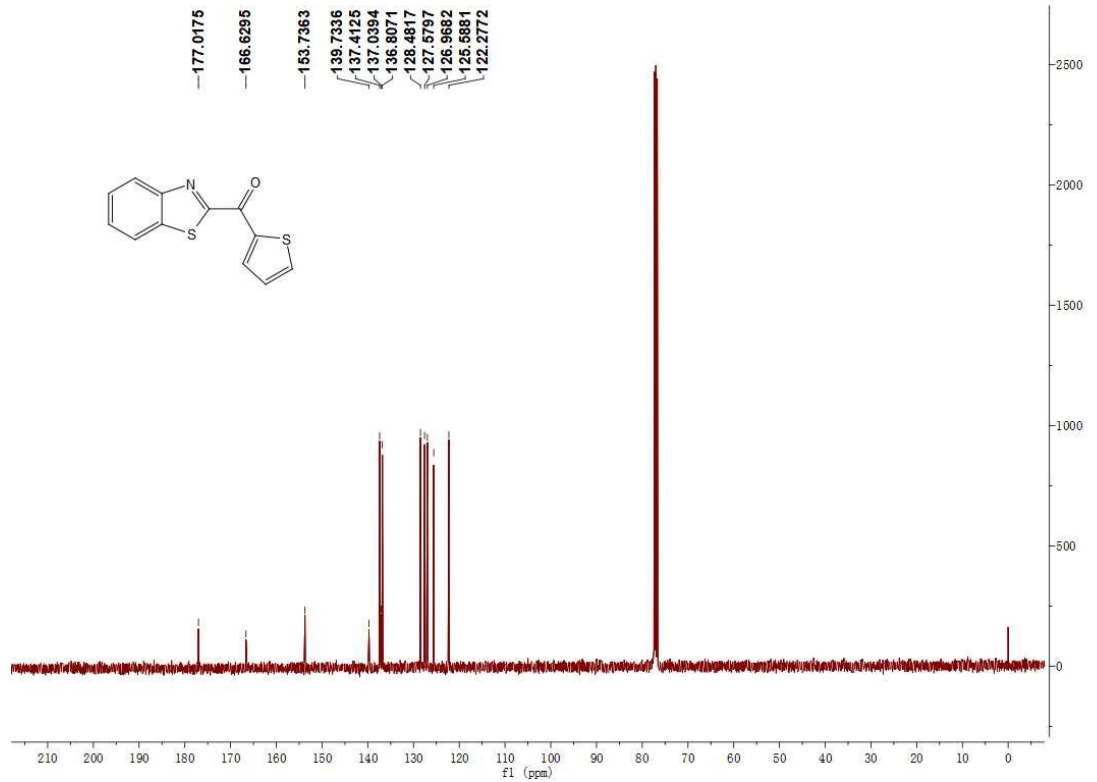

3q

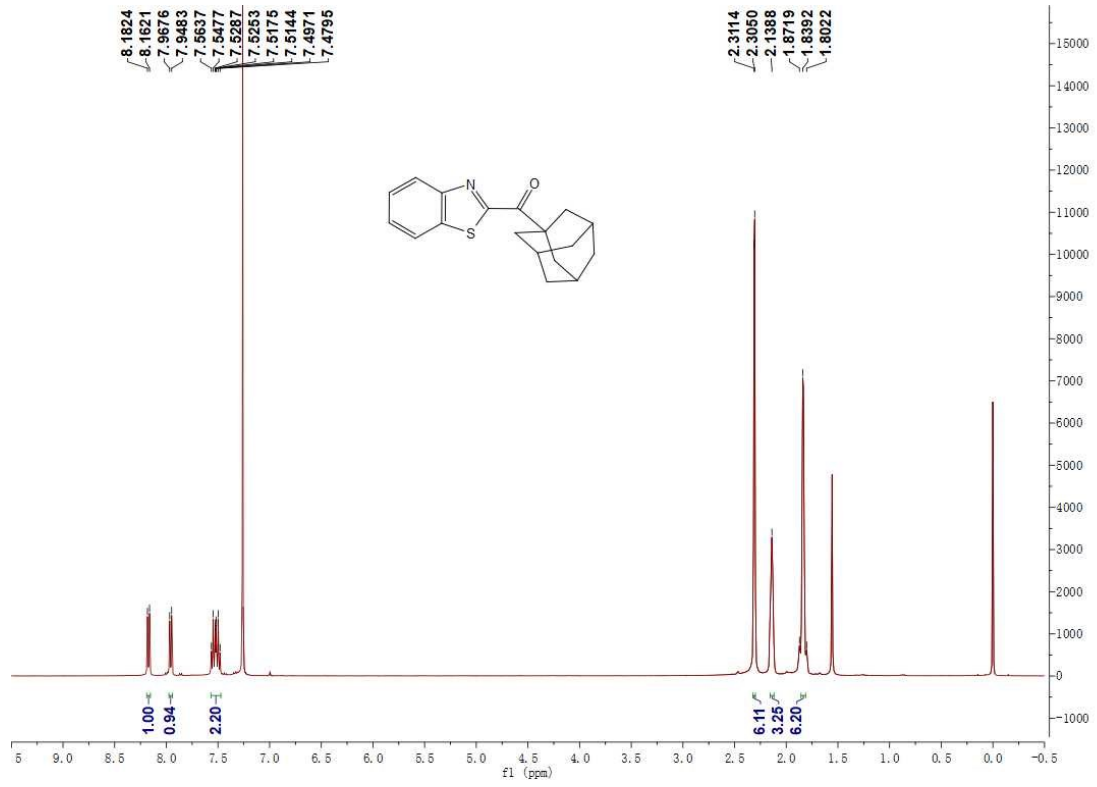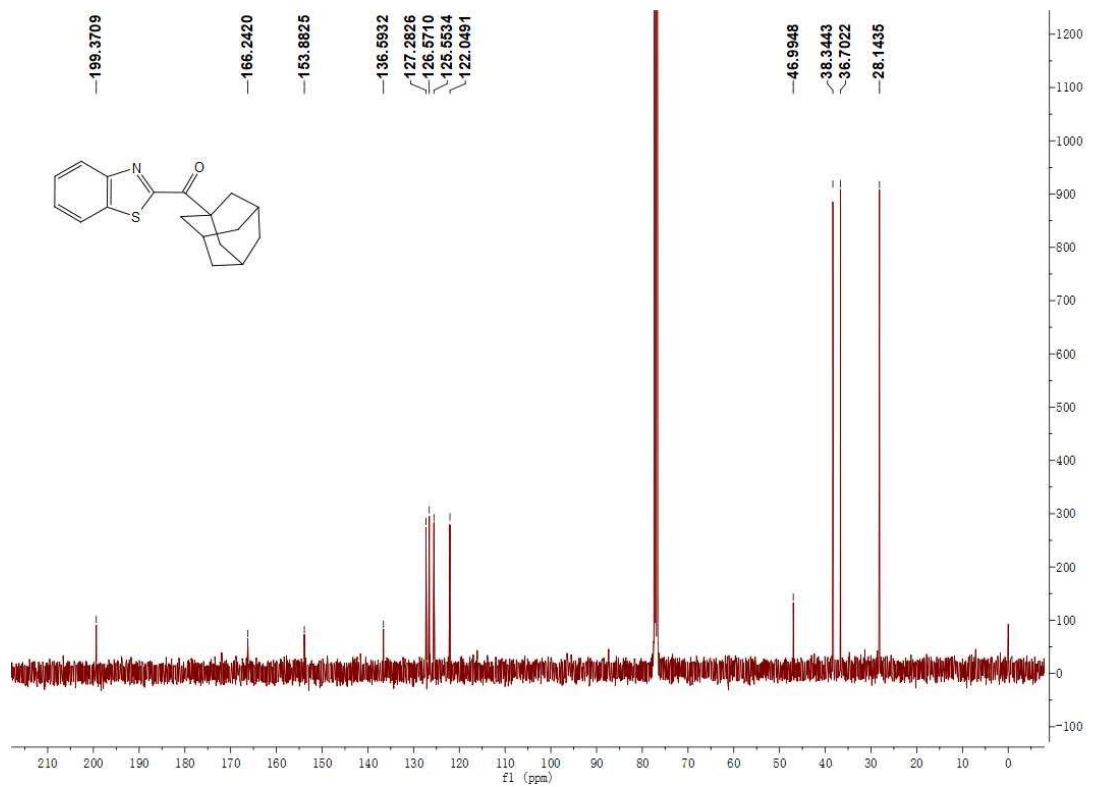

3s

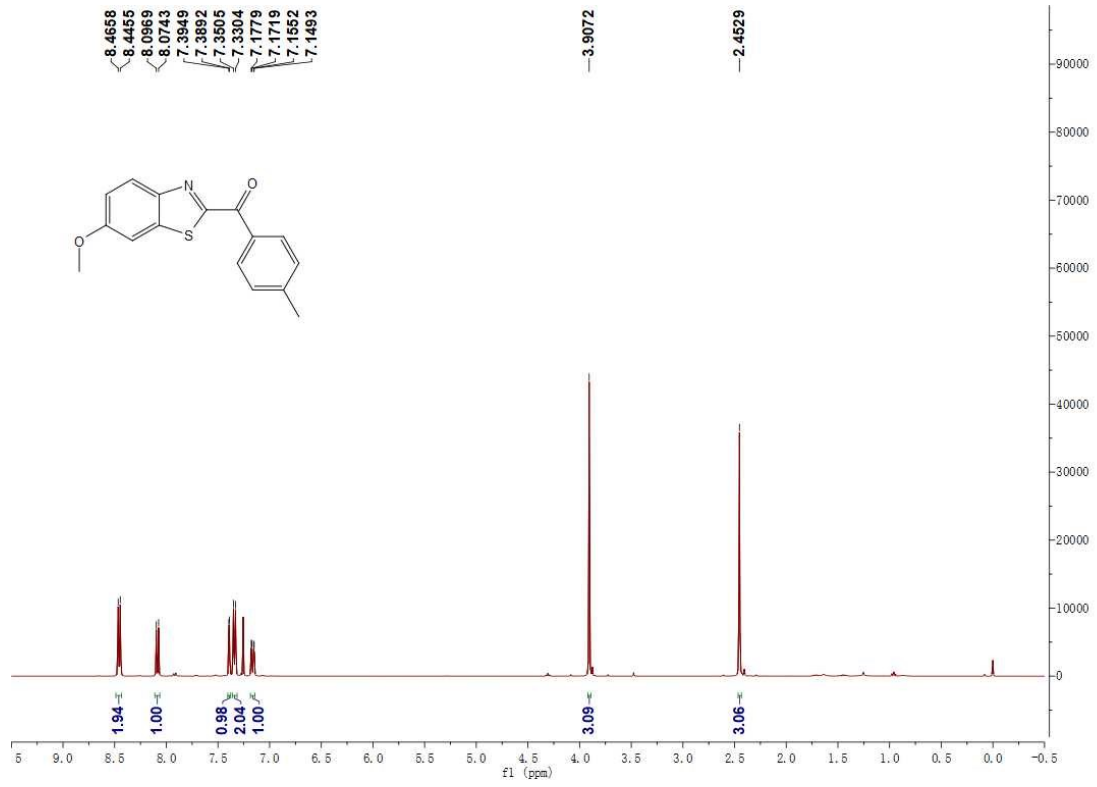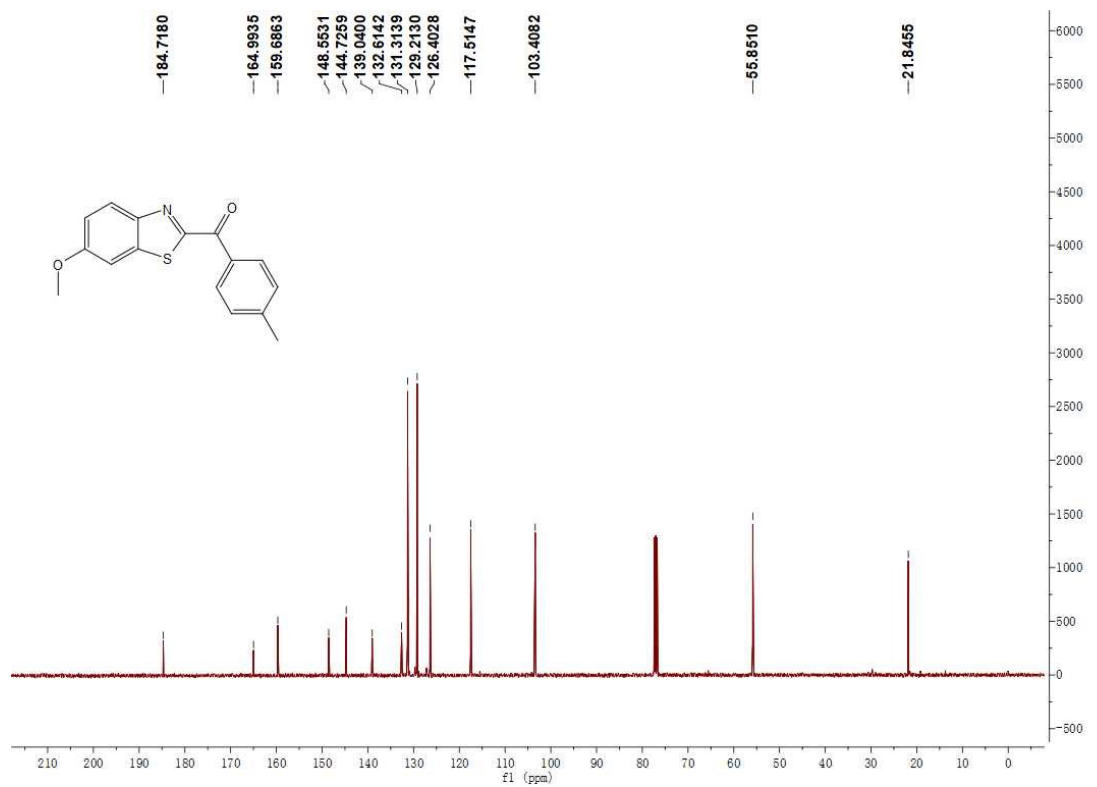

3t

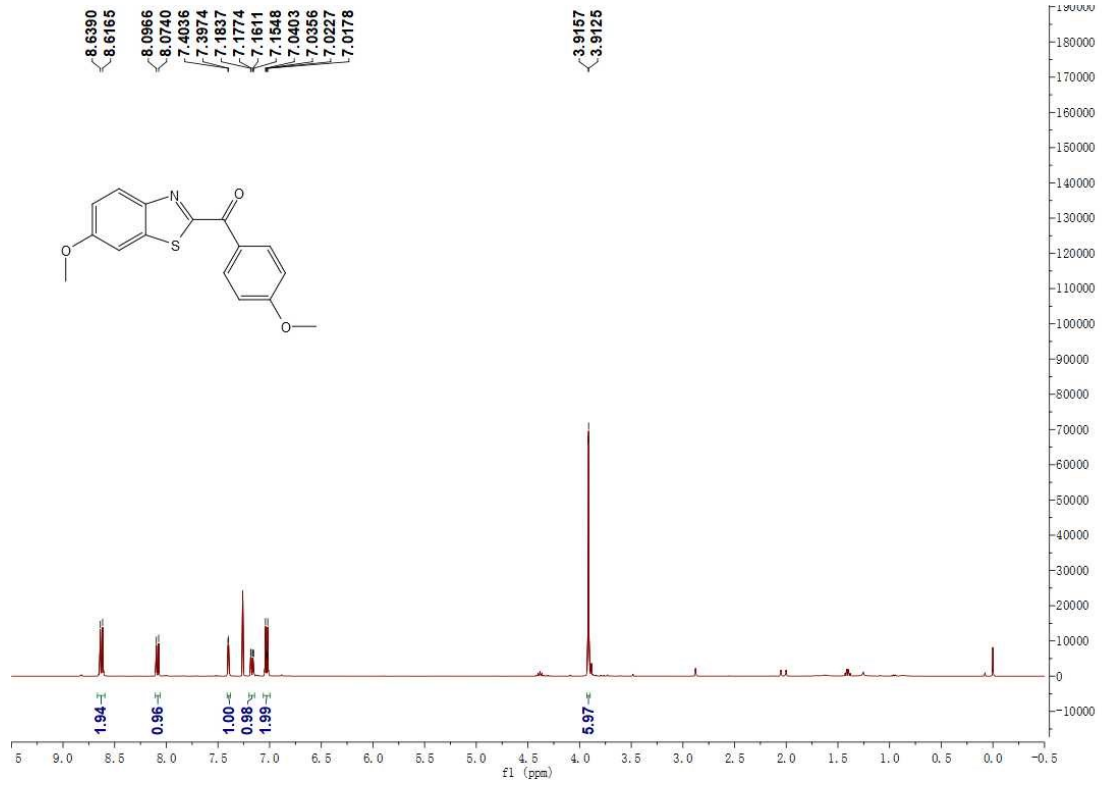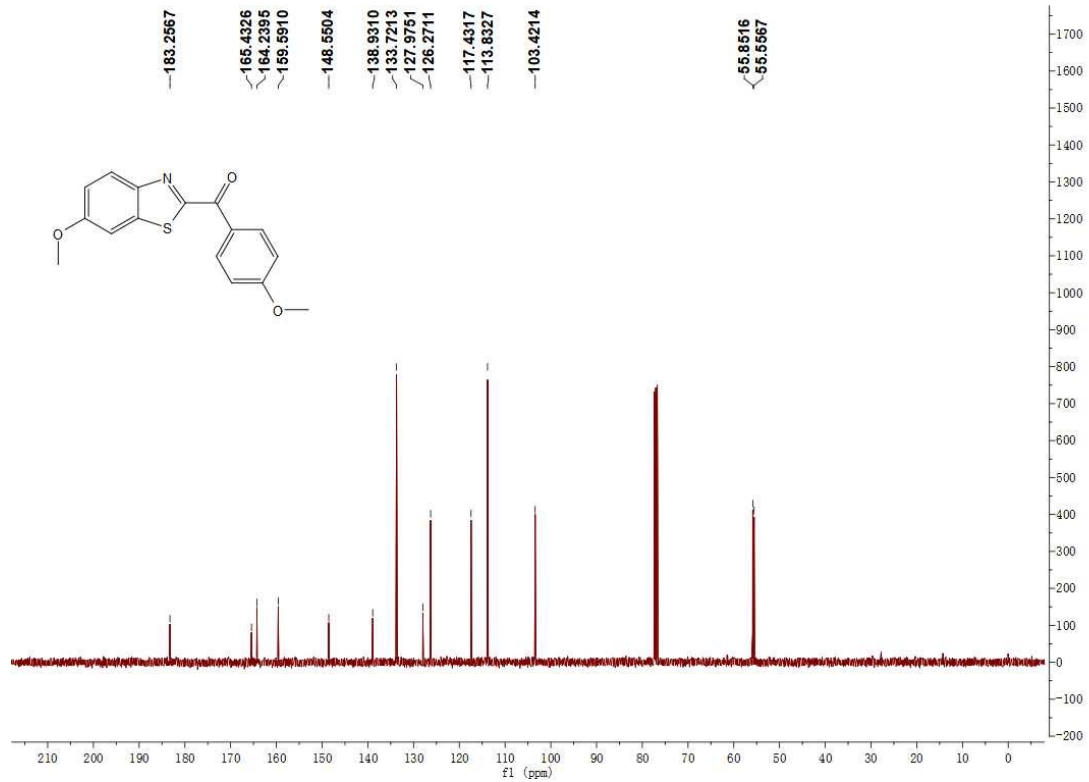



### 3u

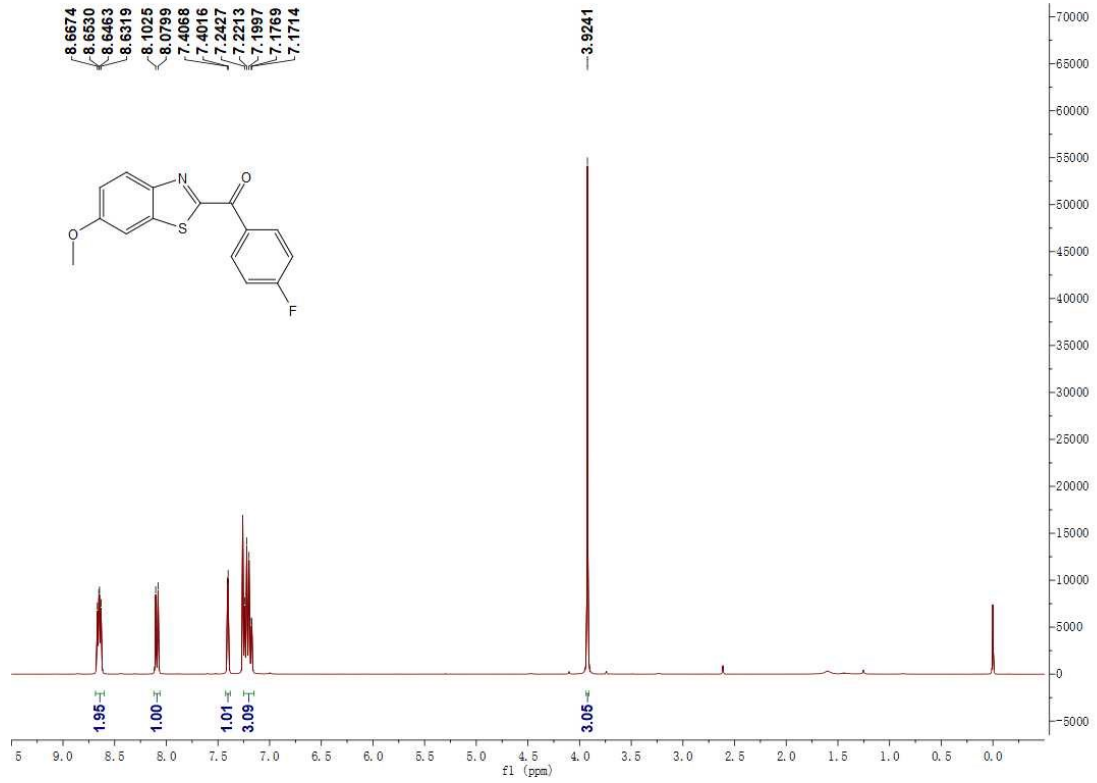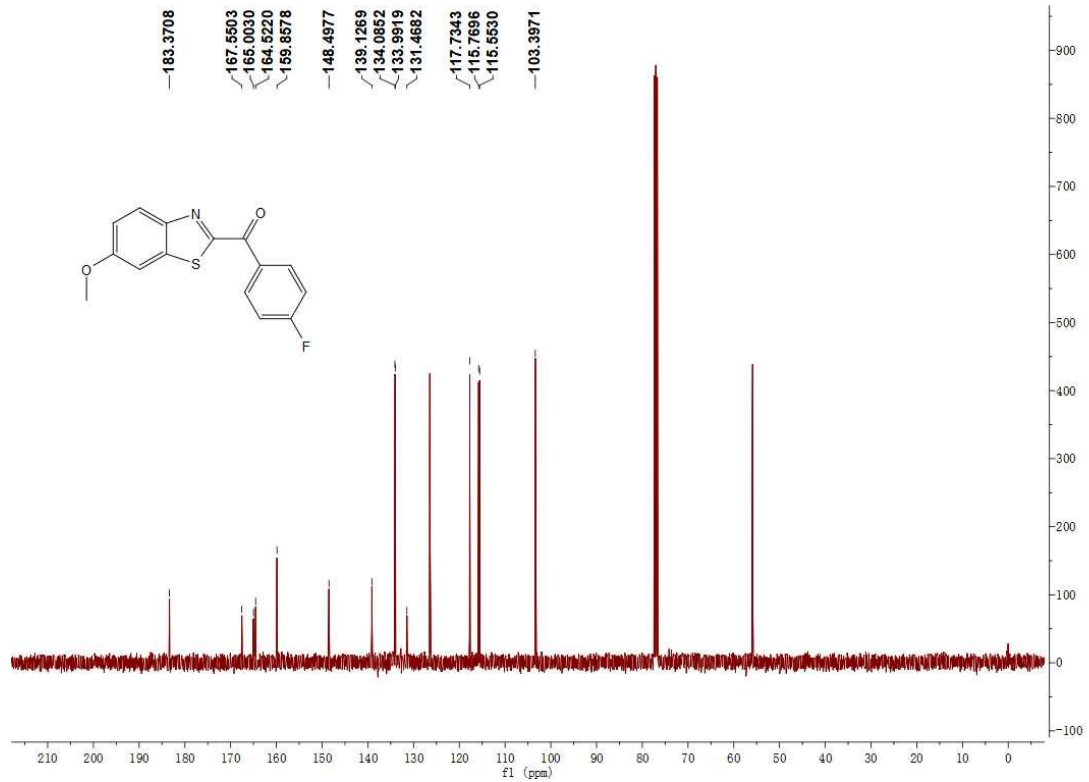

3v

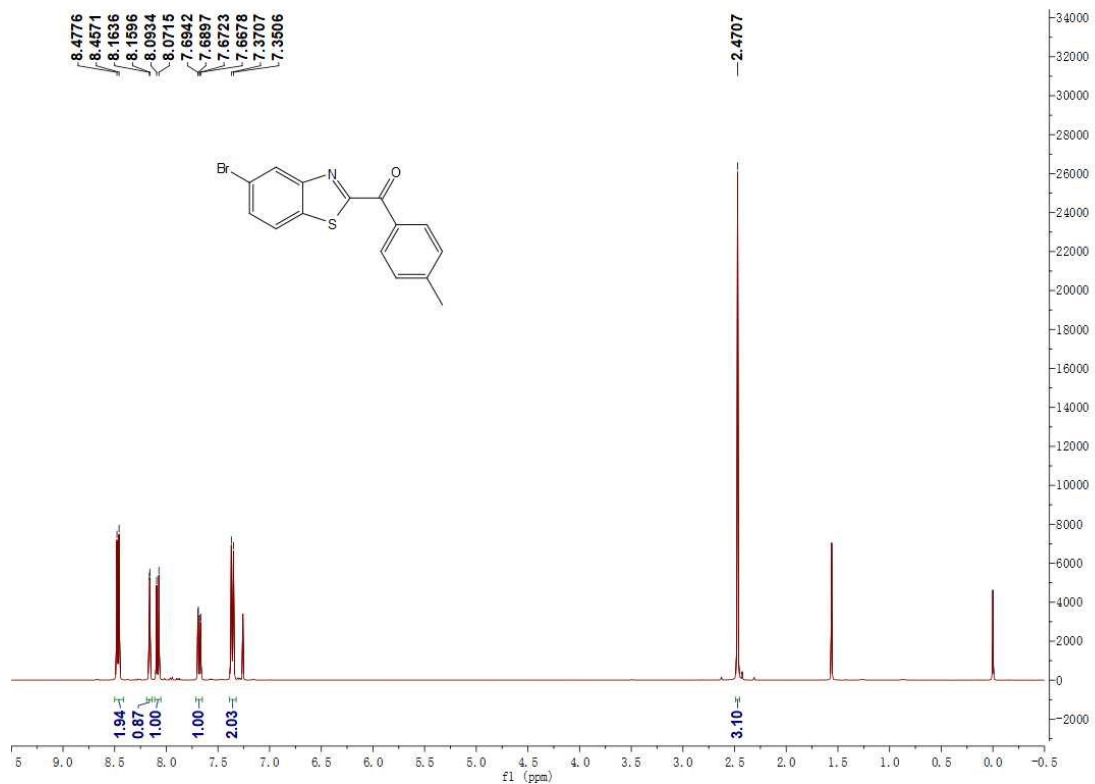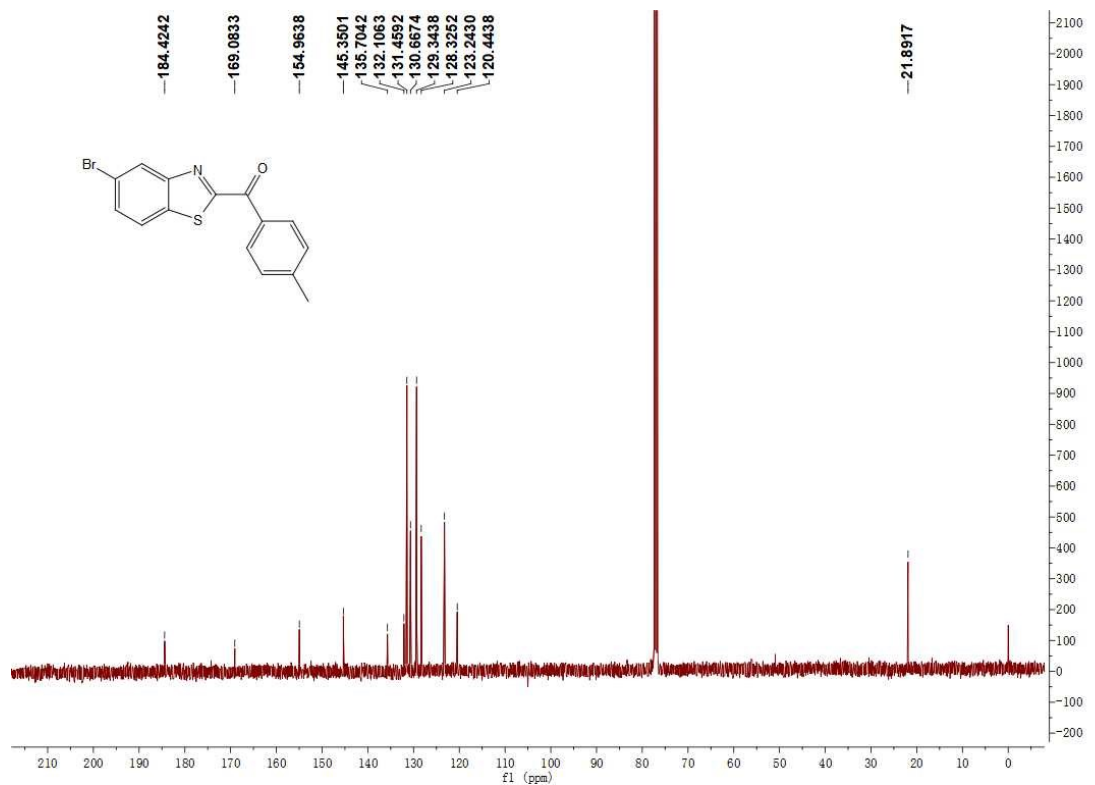

3w

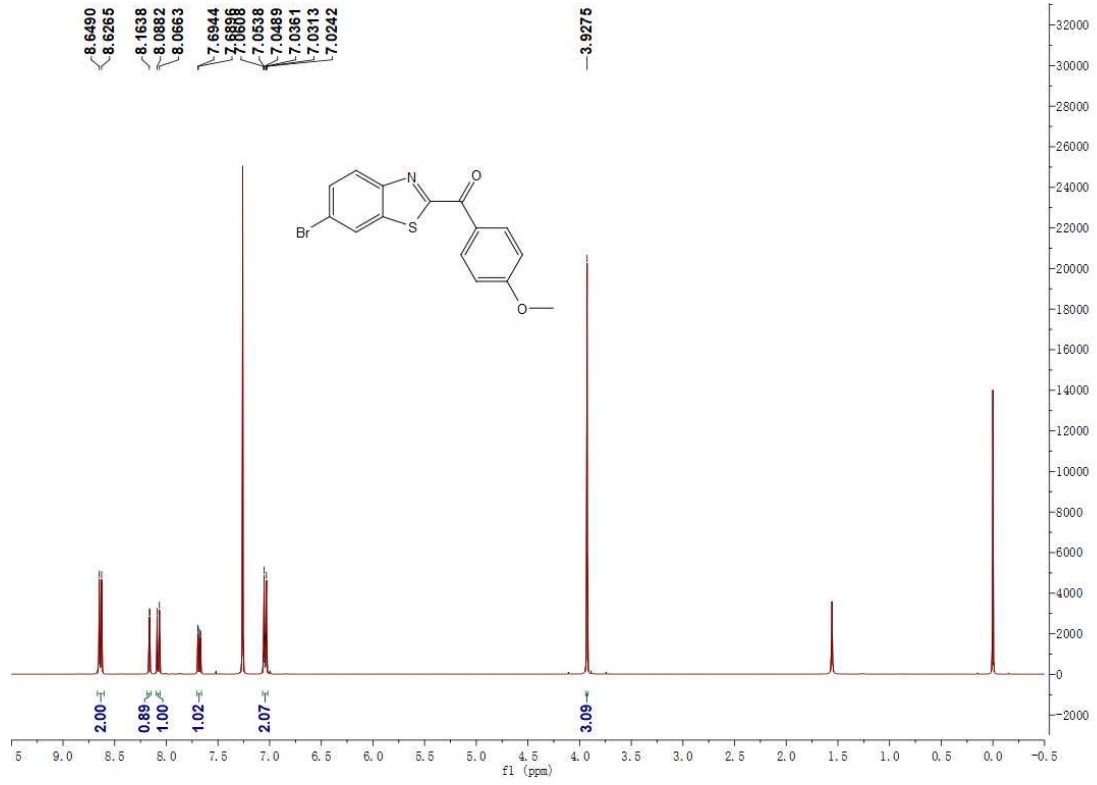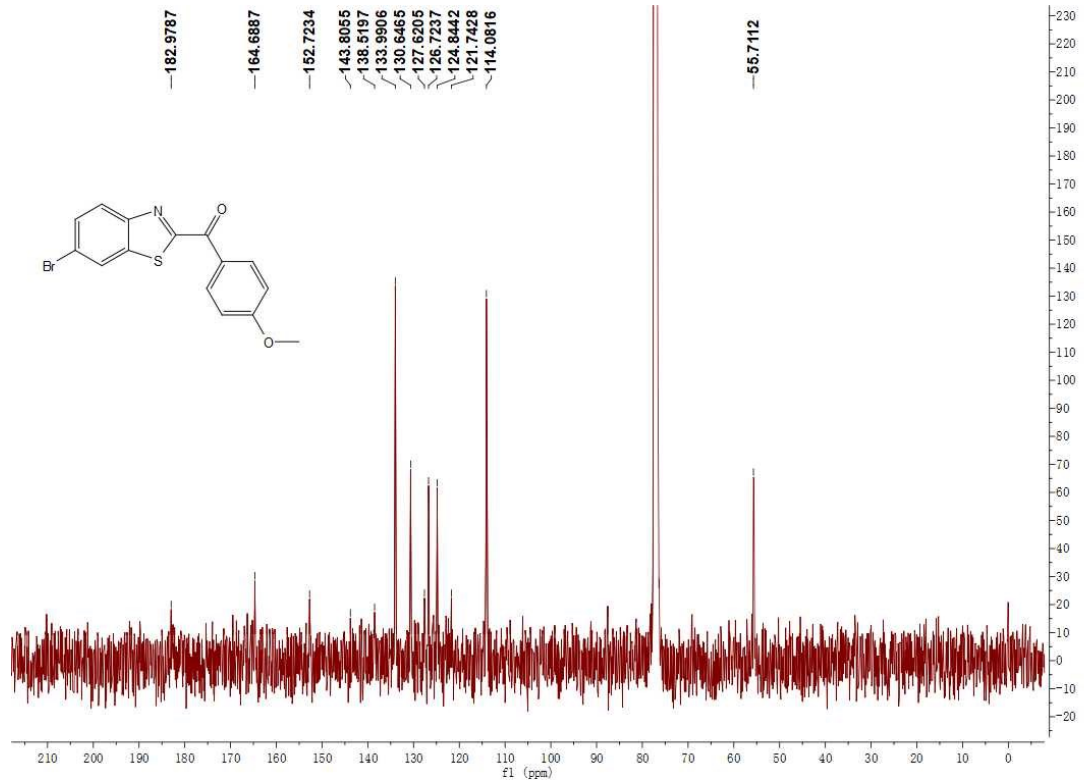

3x

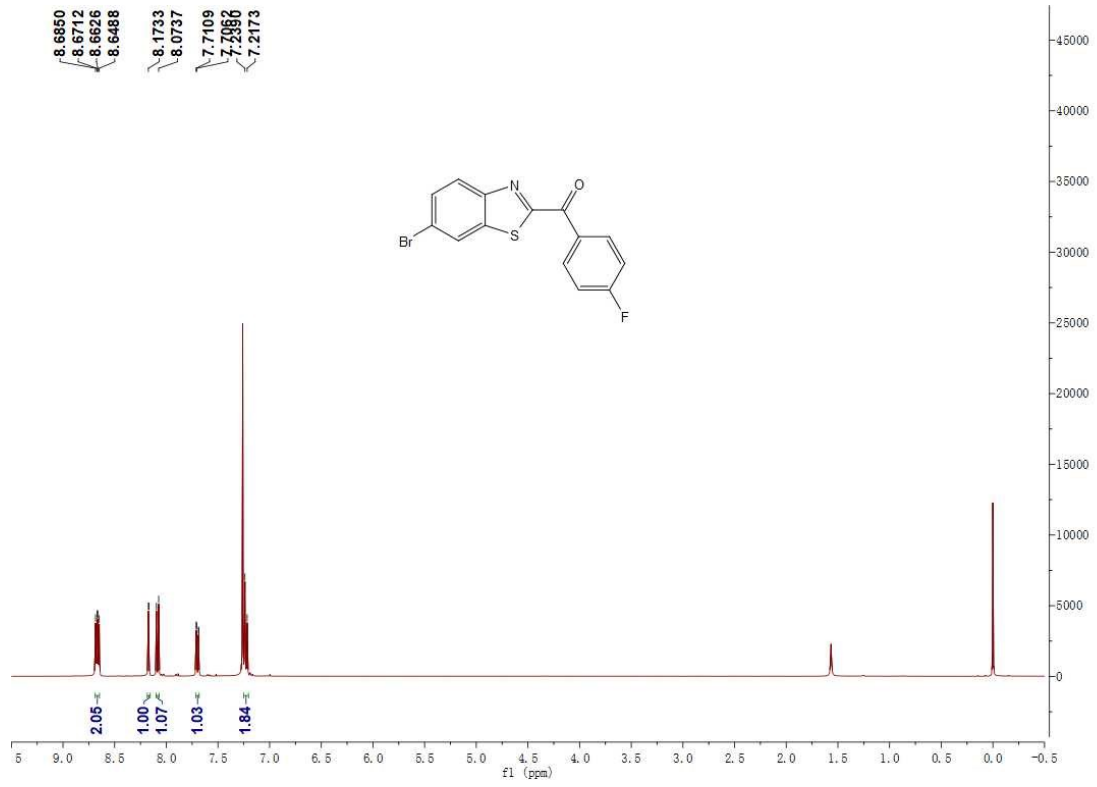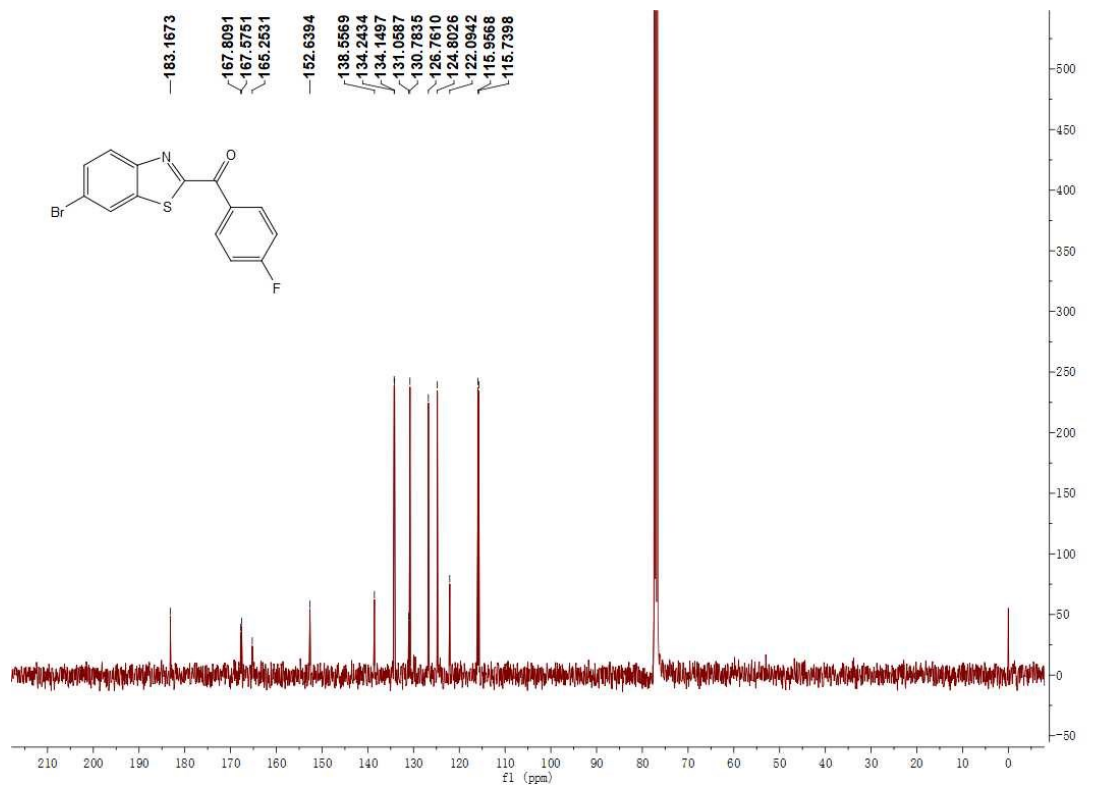

5a

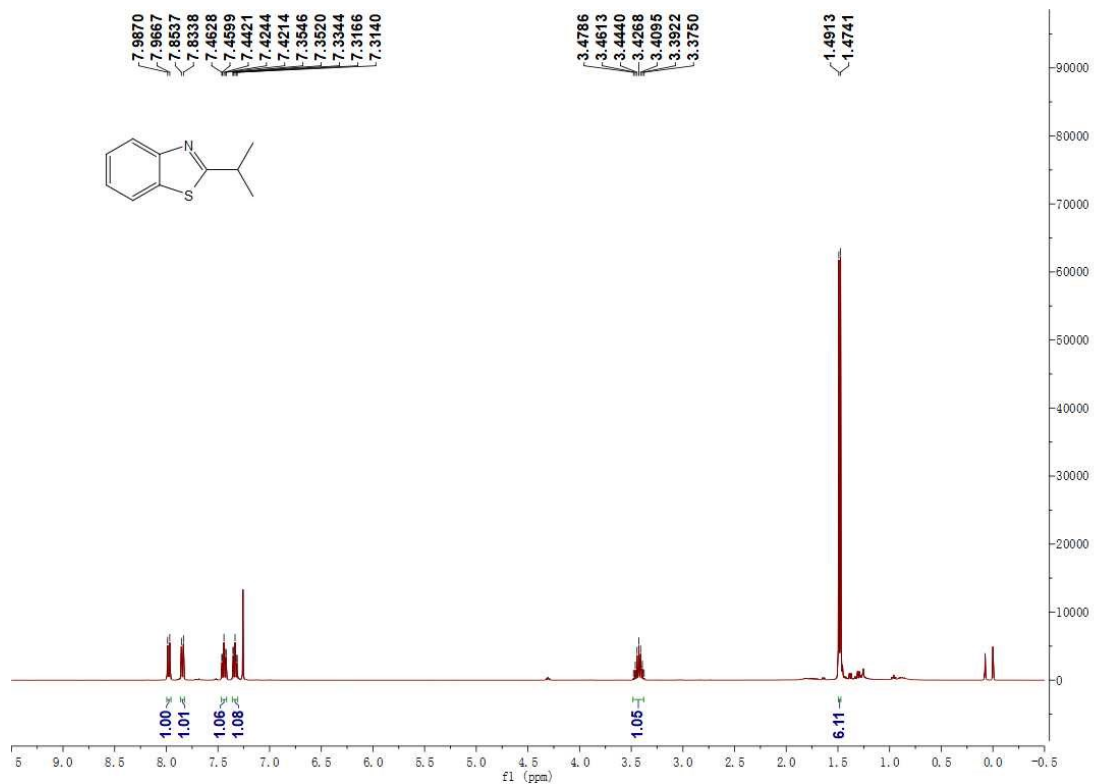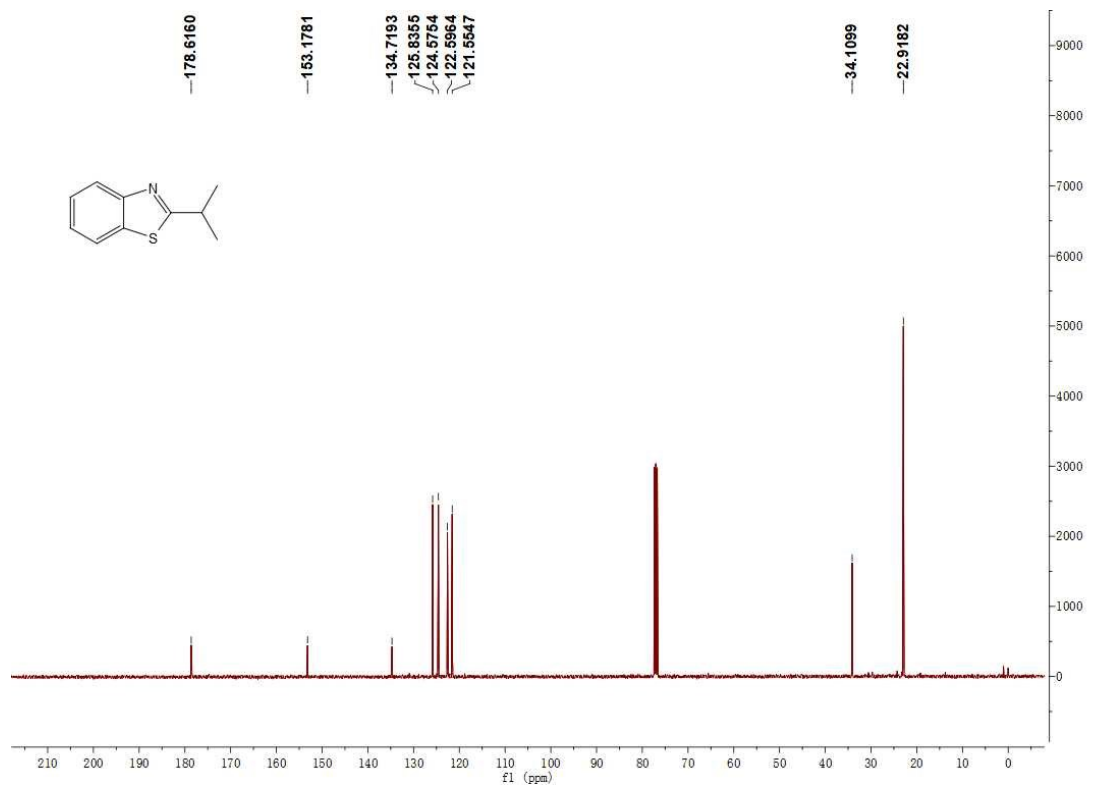

5b

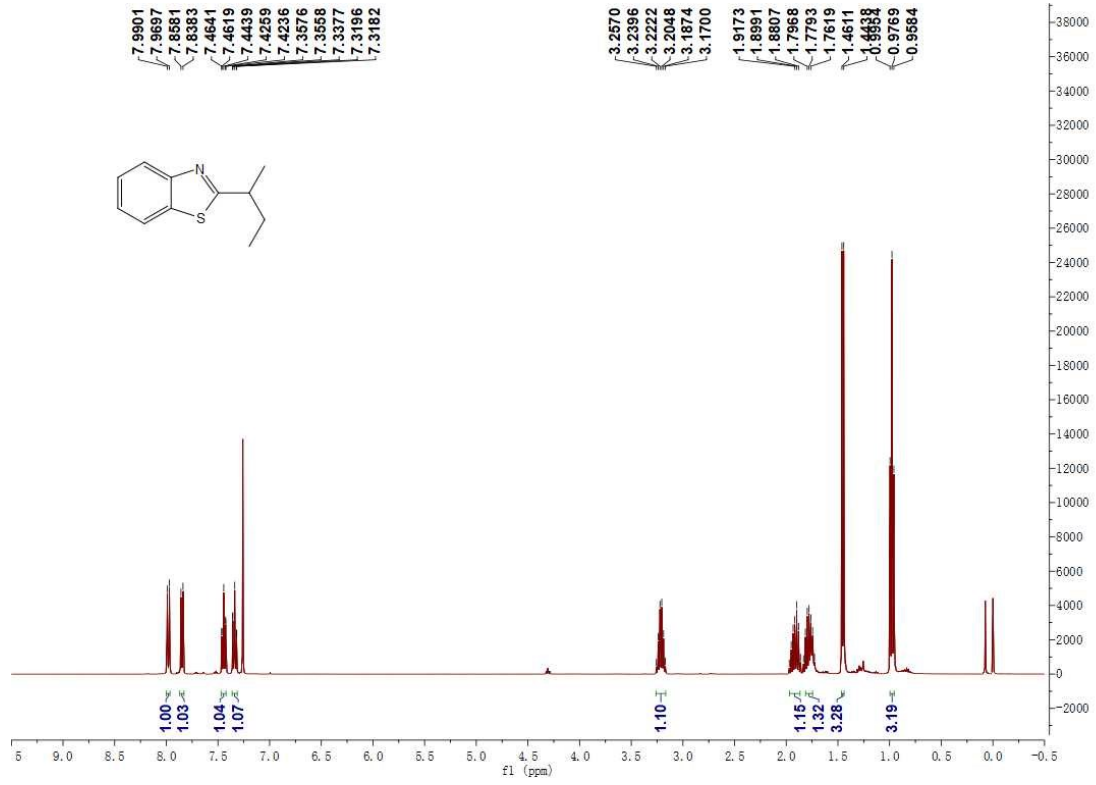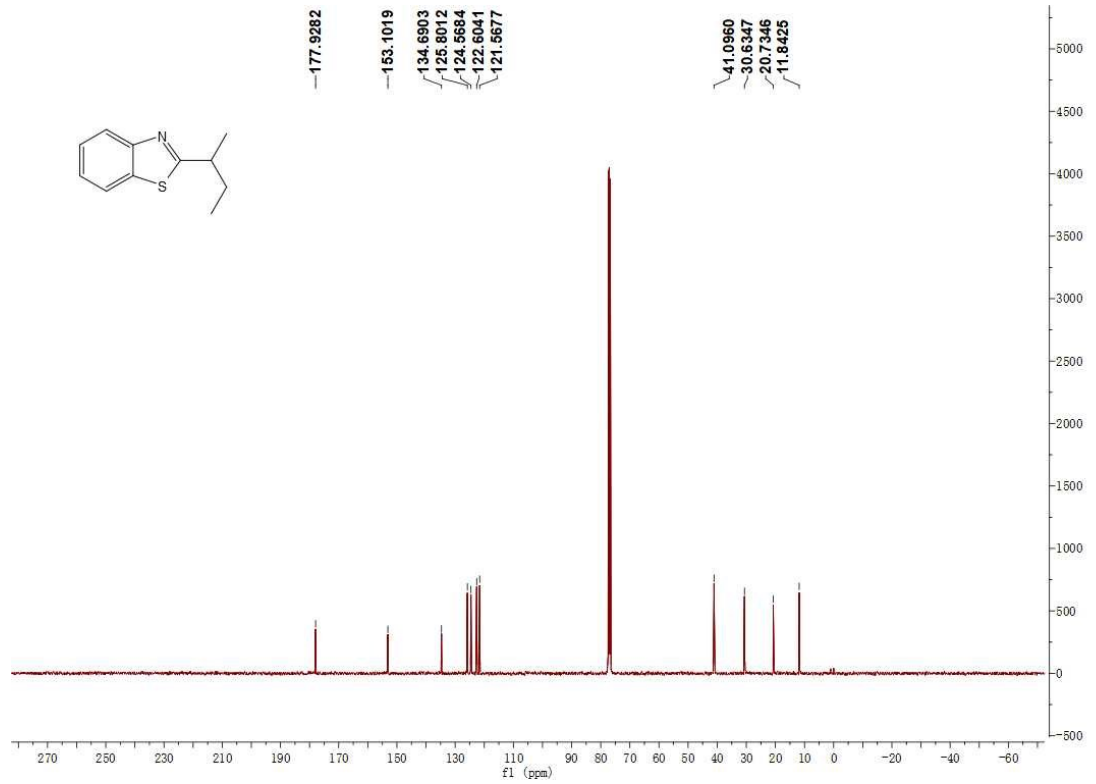

5c

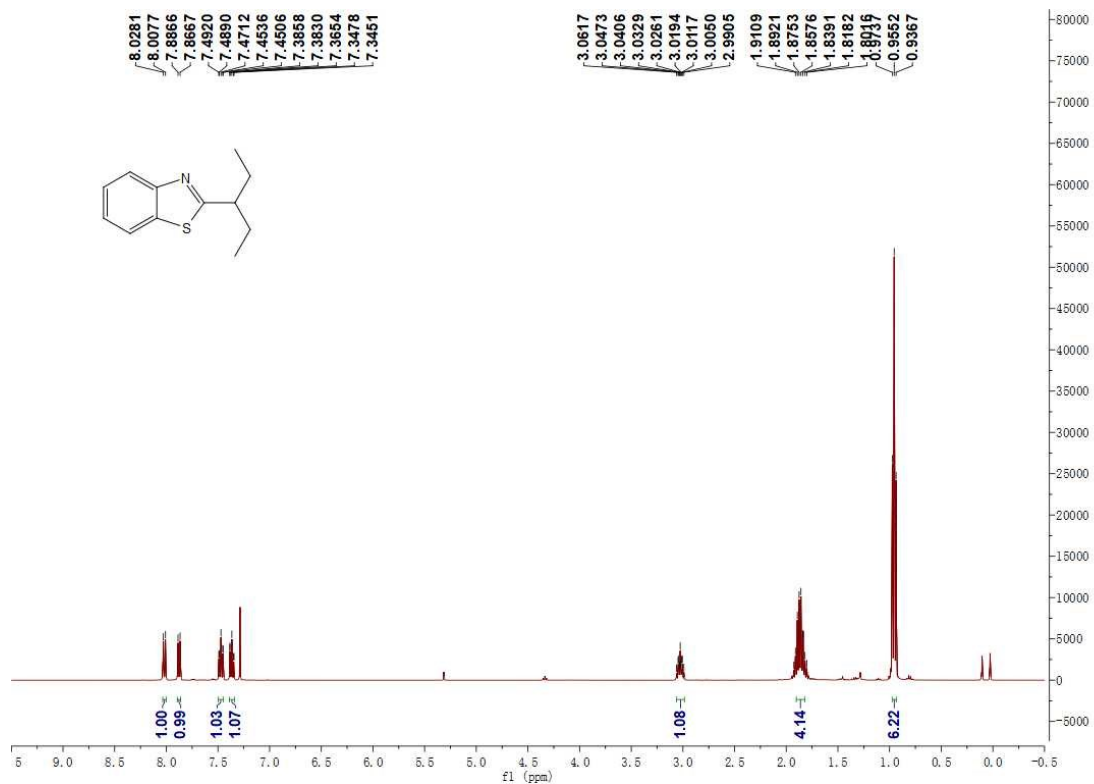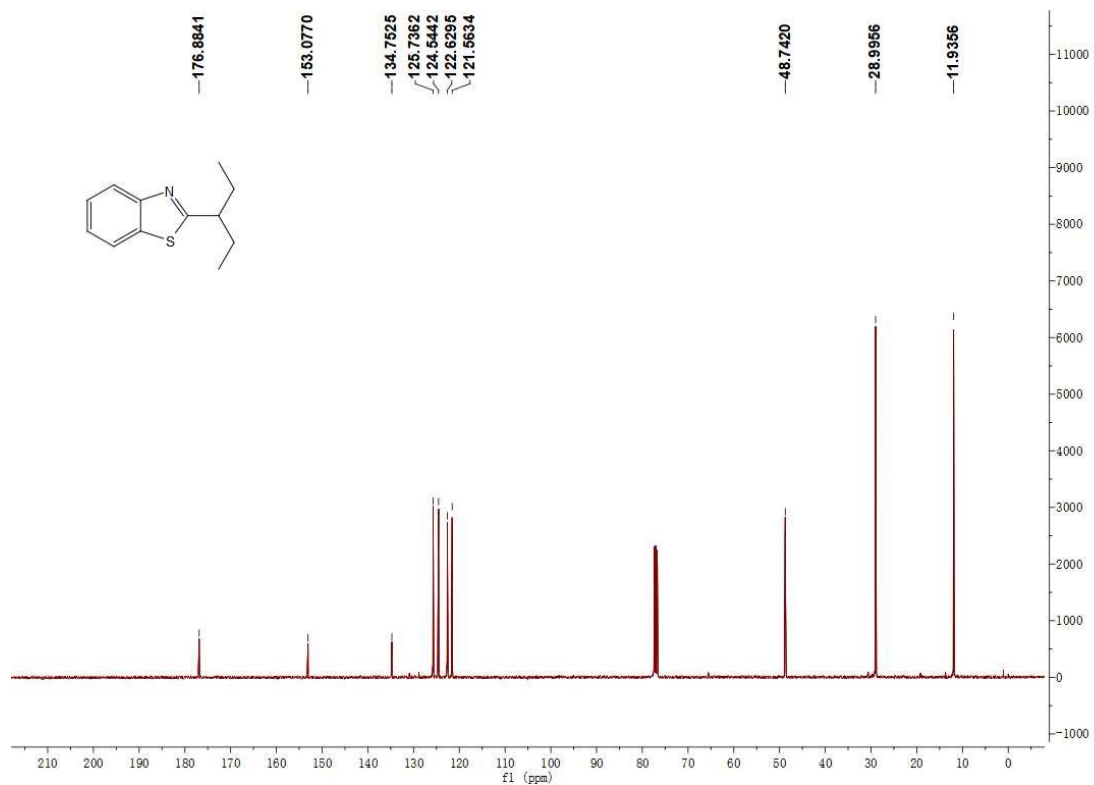

5d

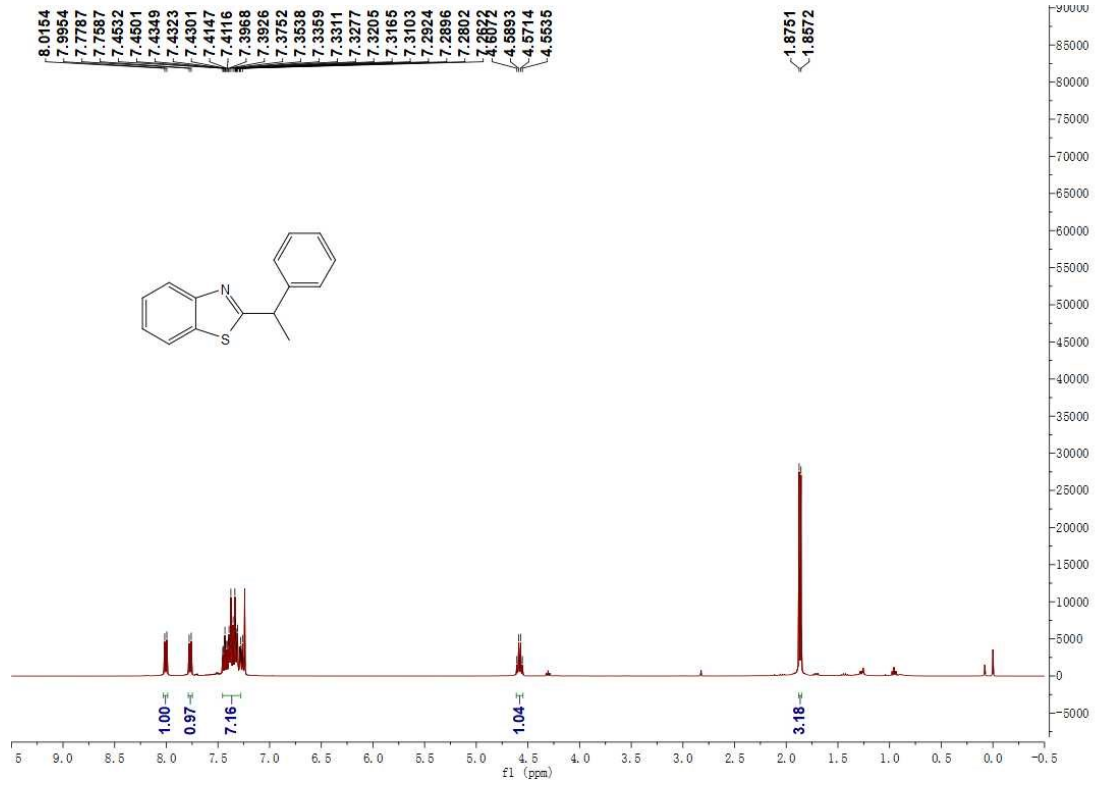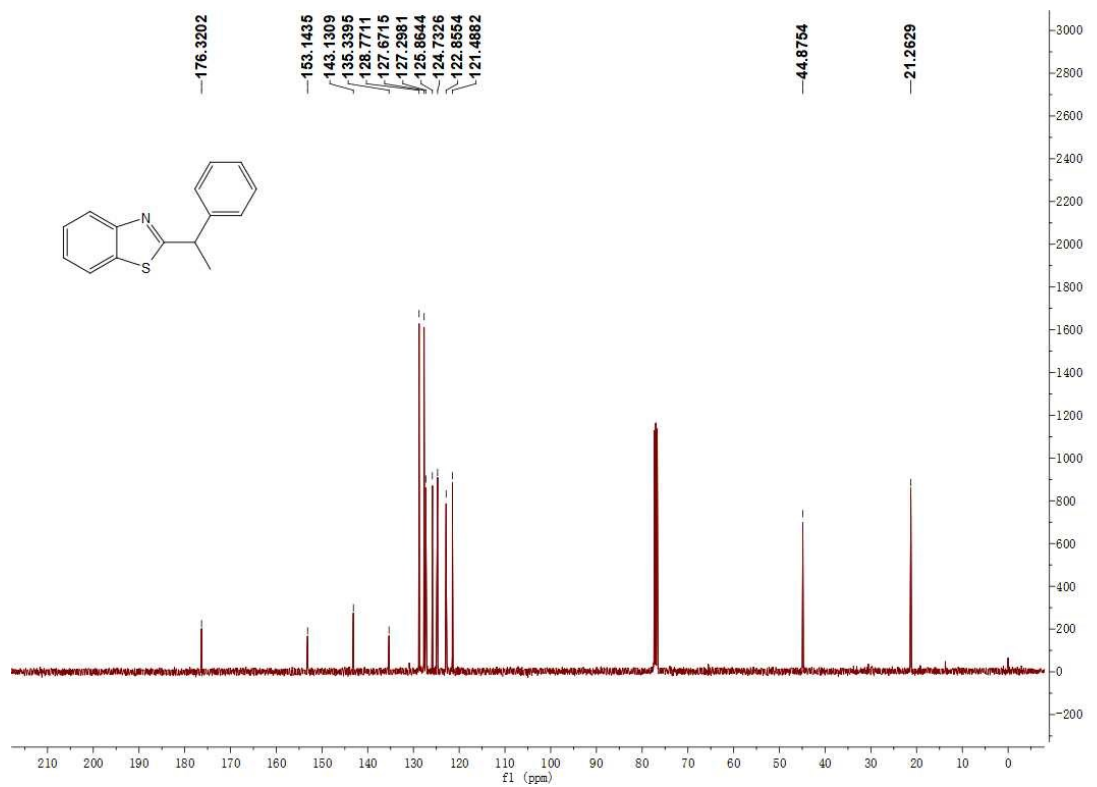



5e

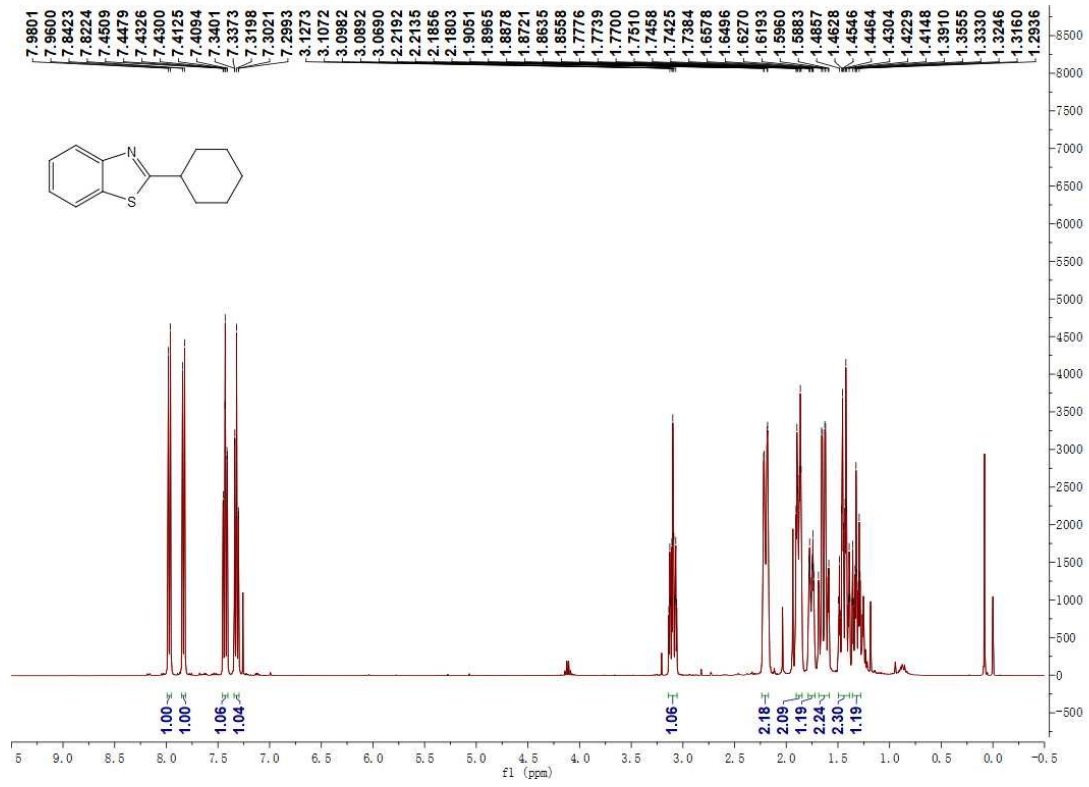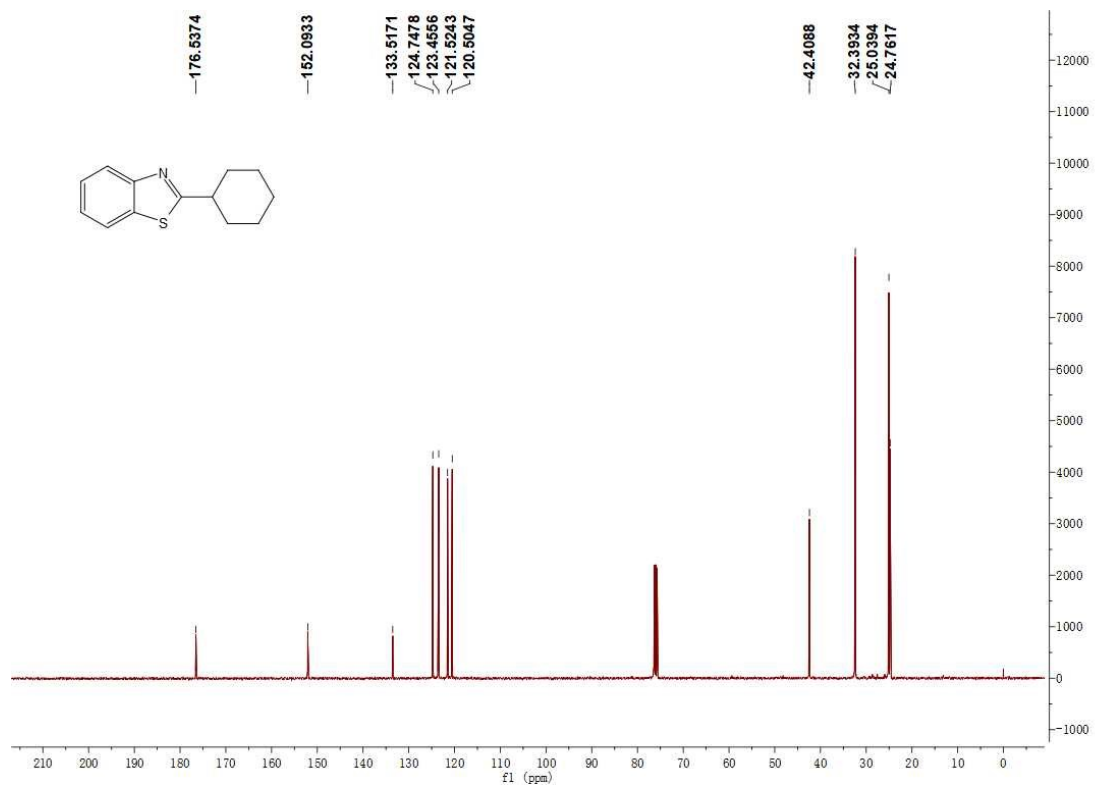

5f

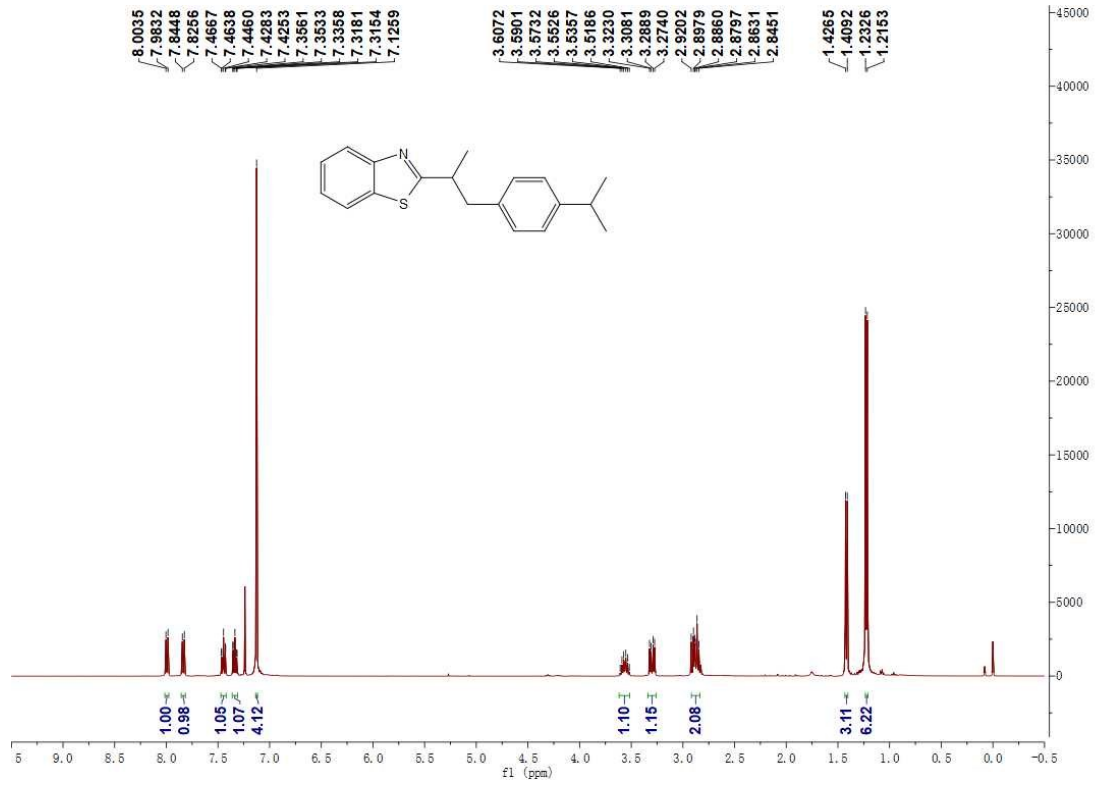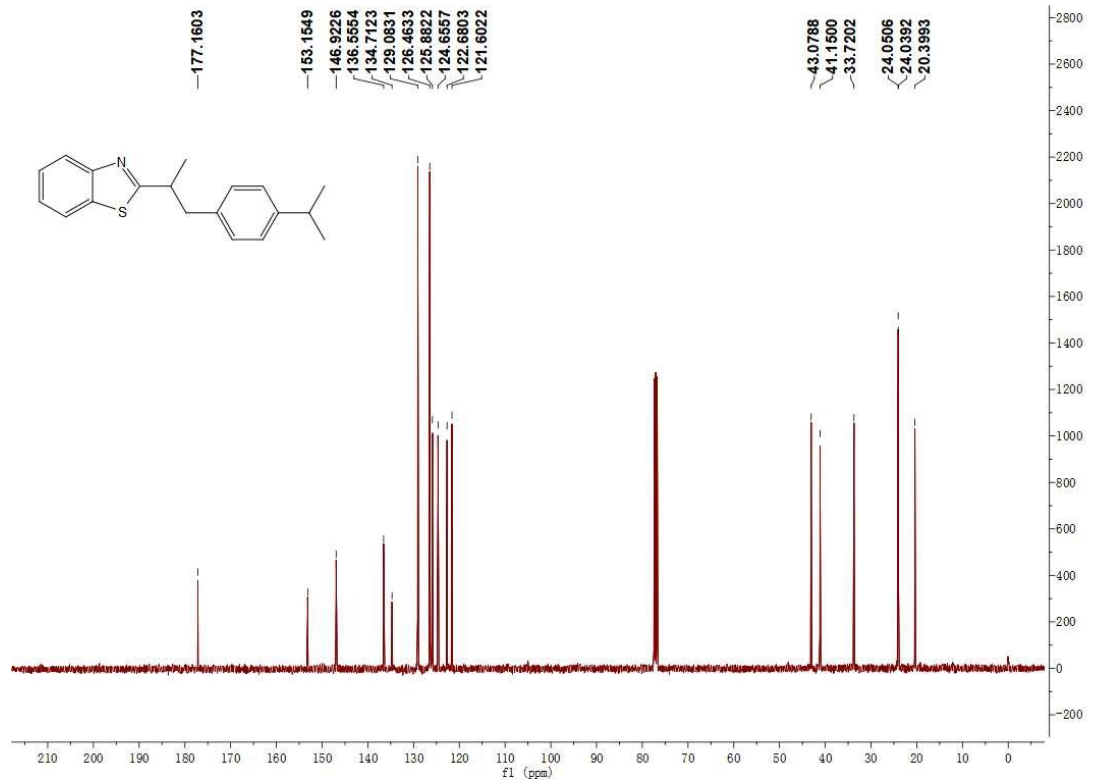

5g

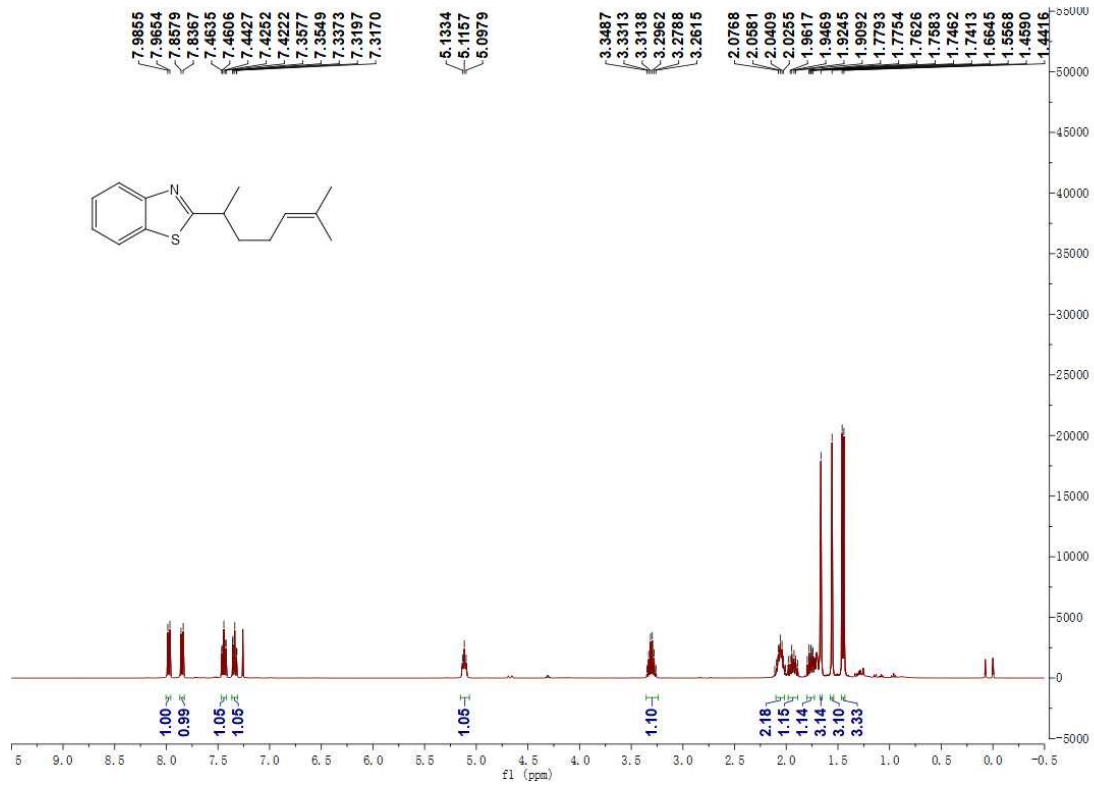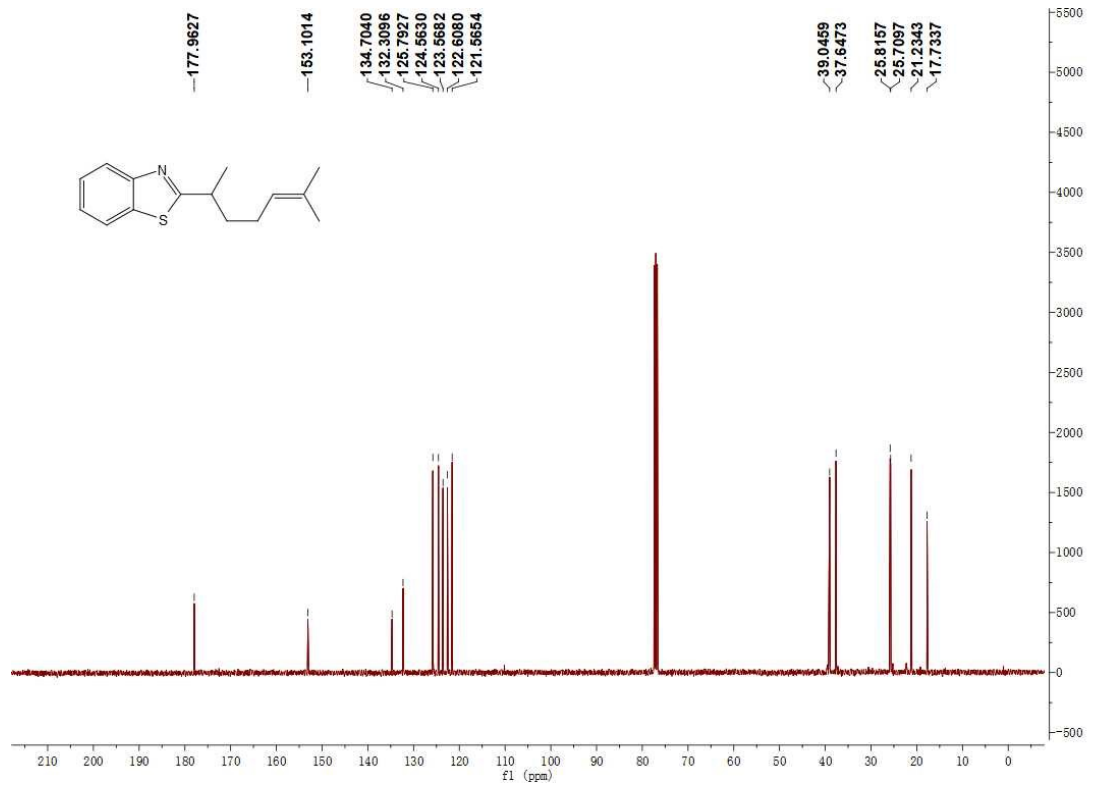

# 5h

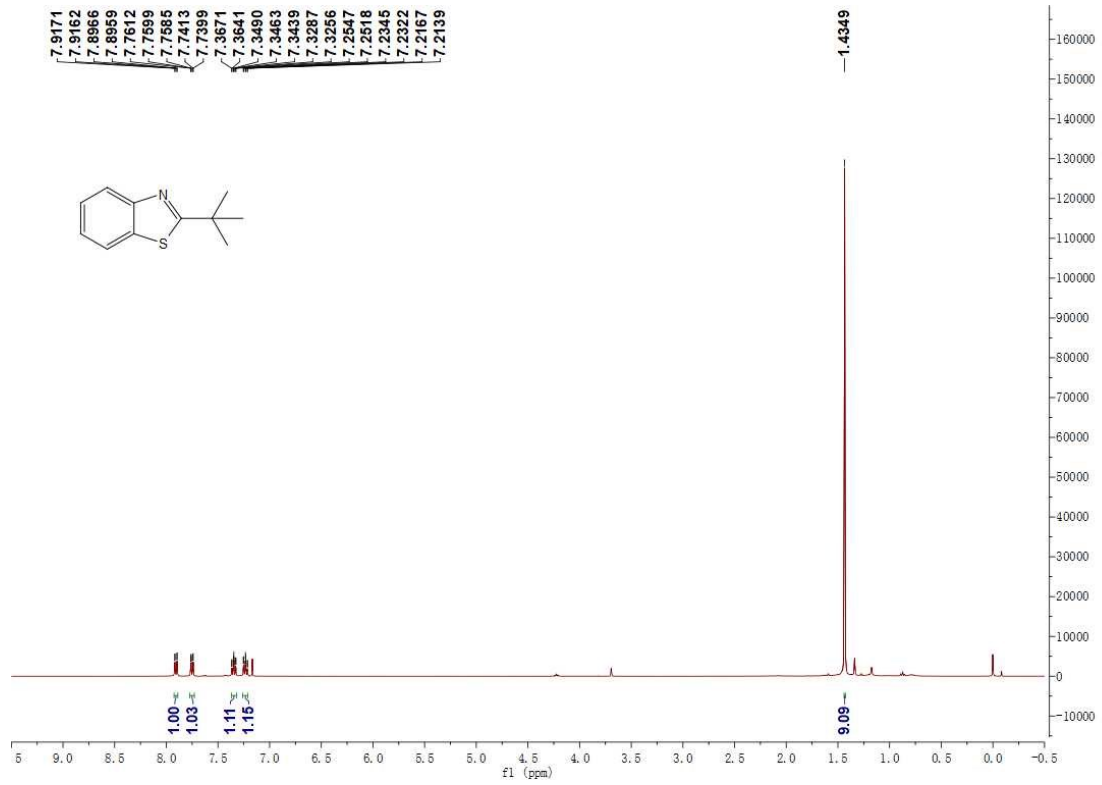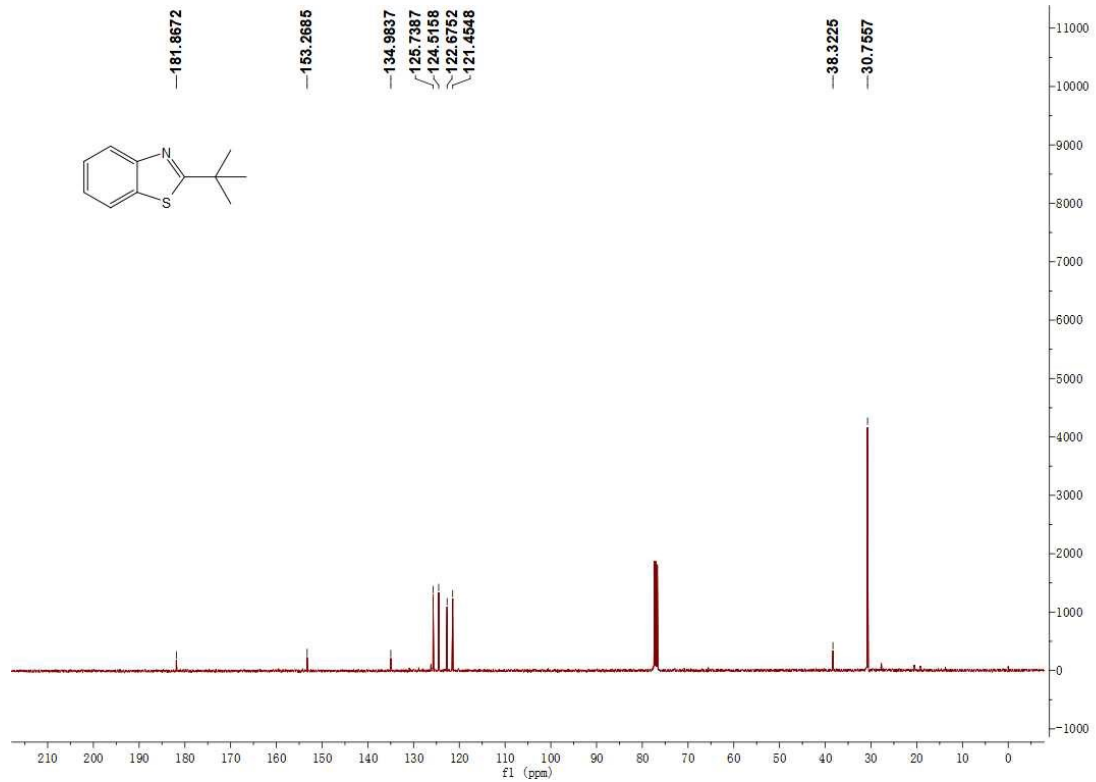

5i

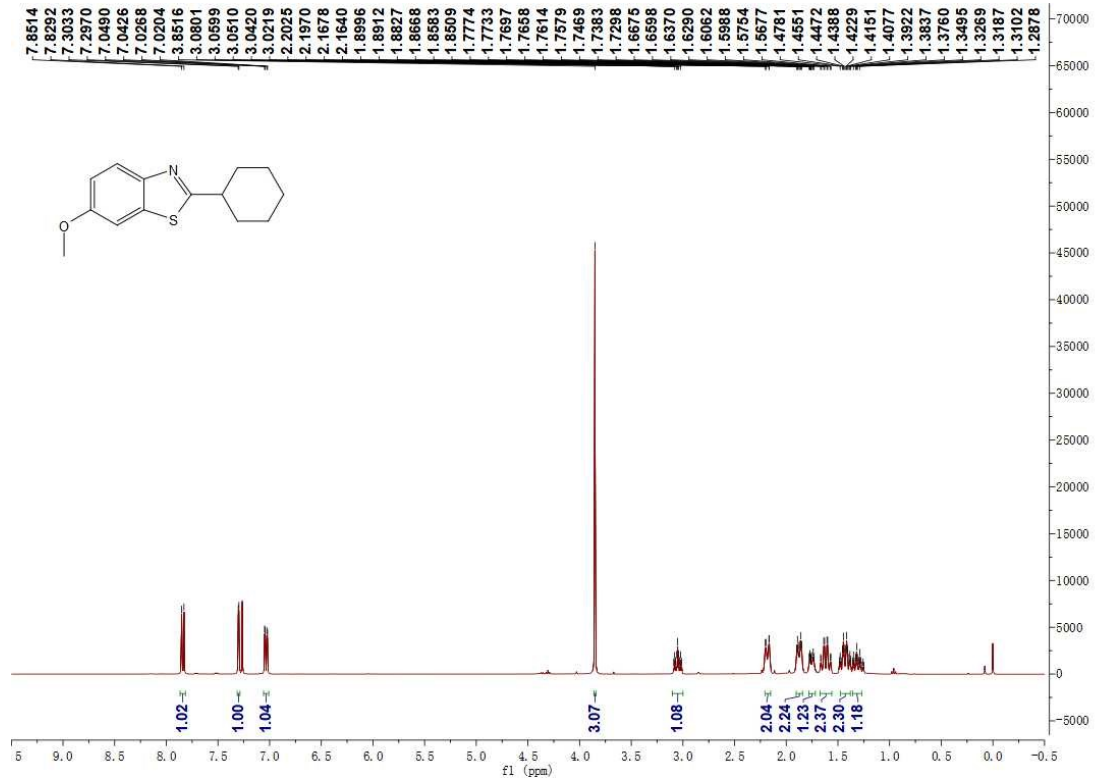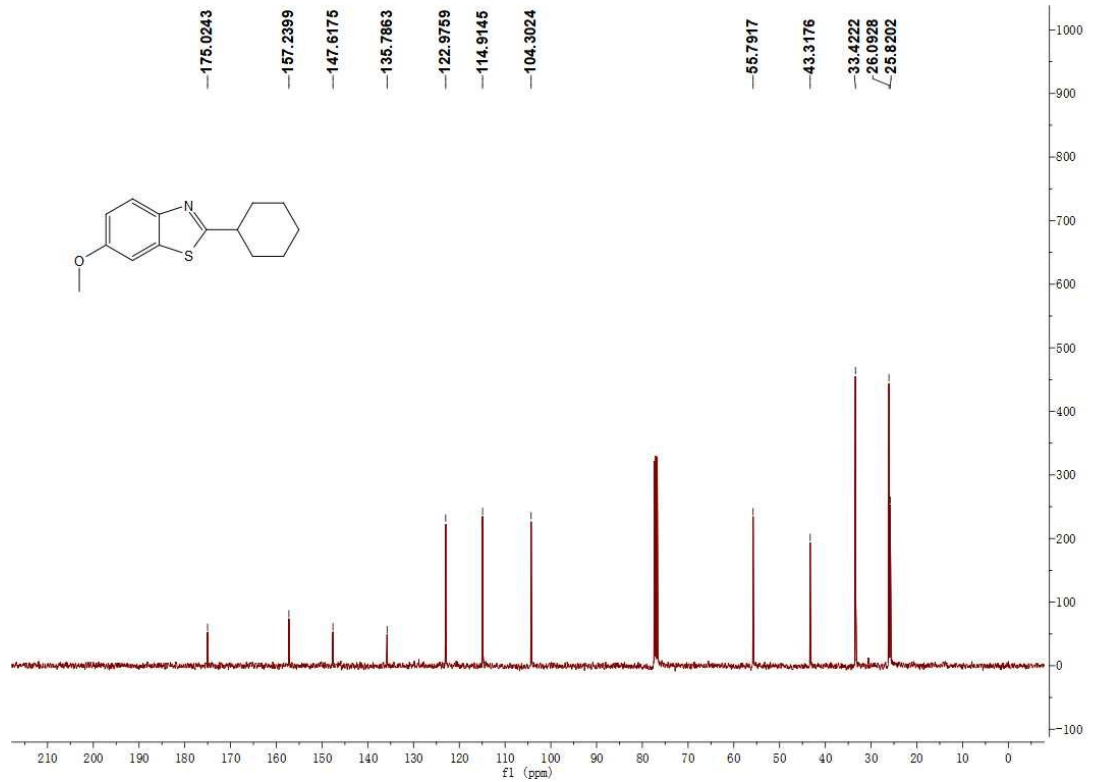

5j

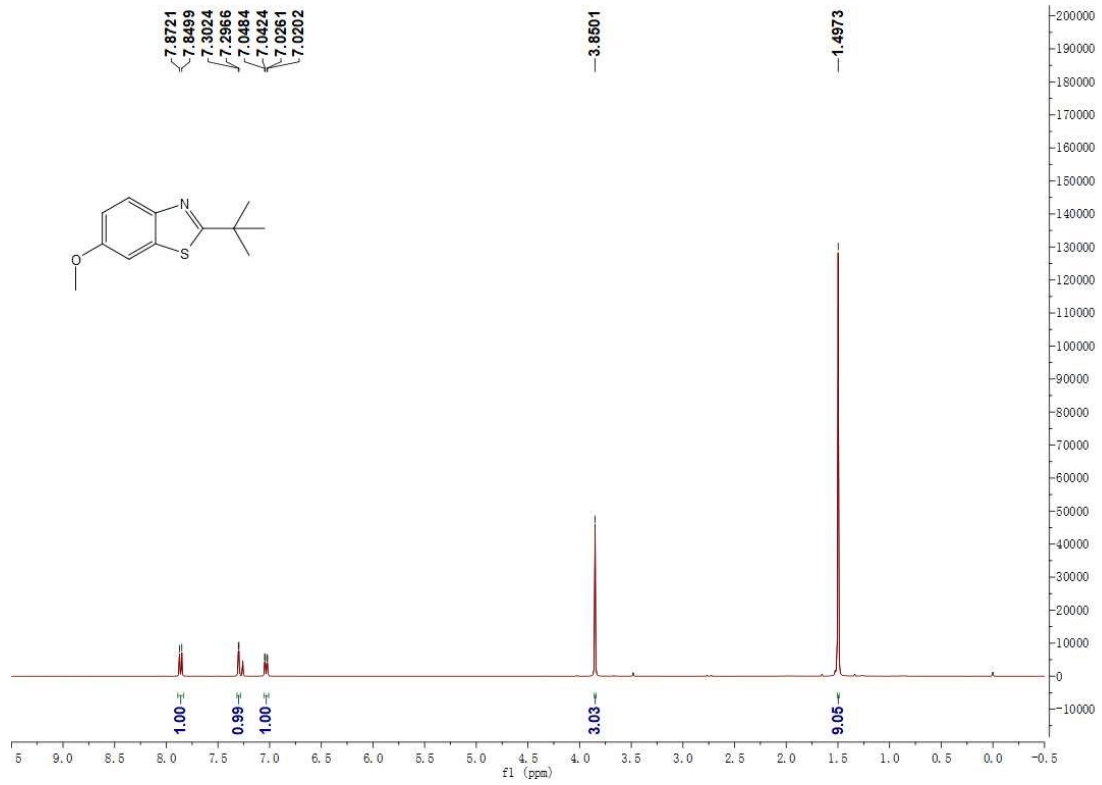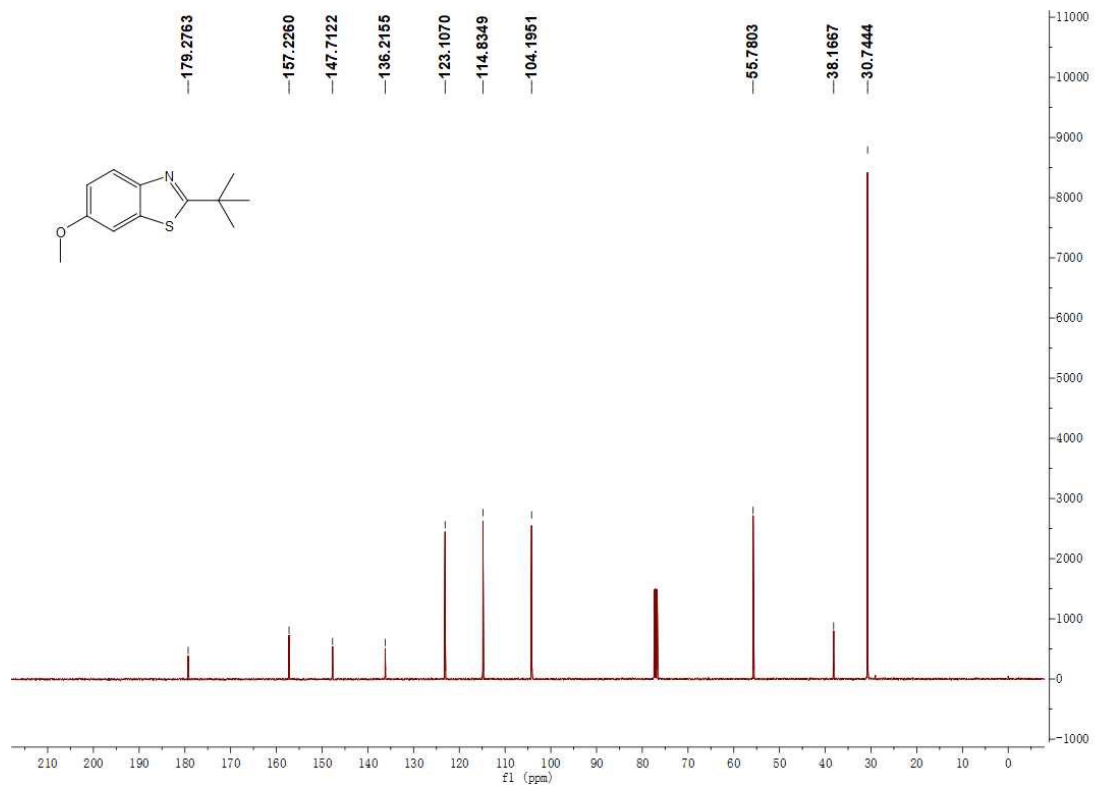

5k

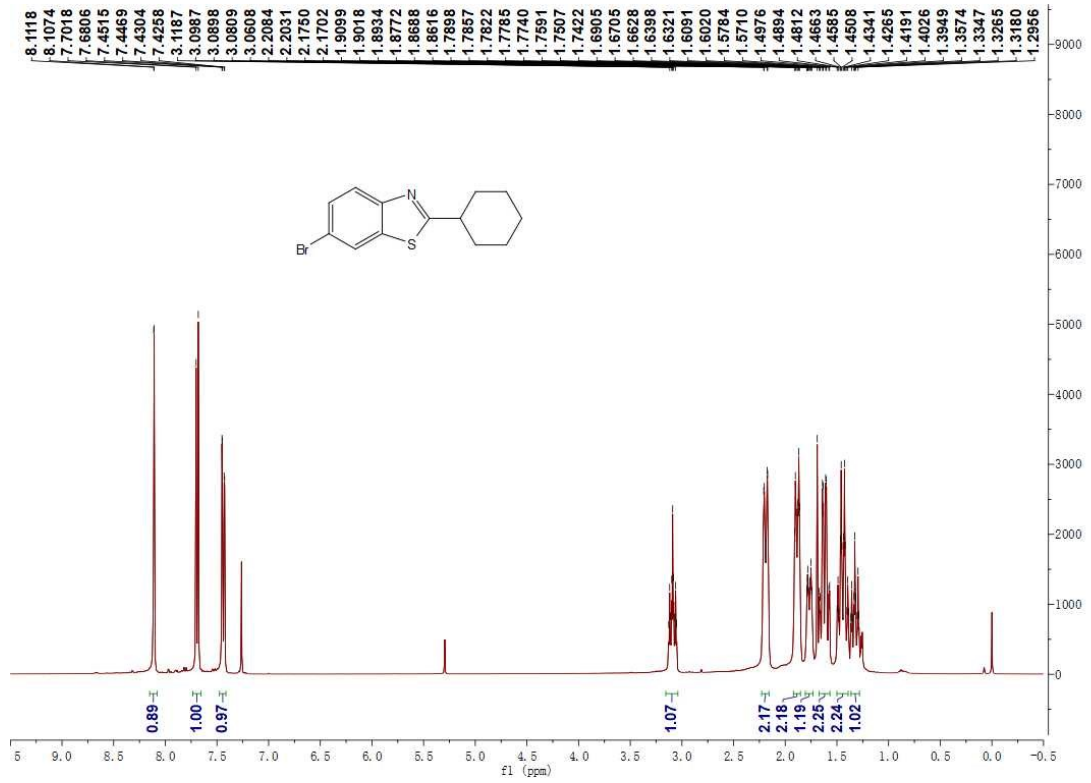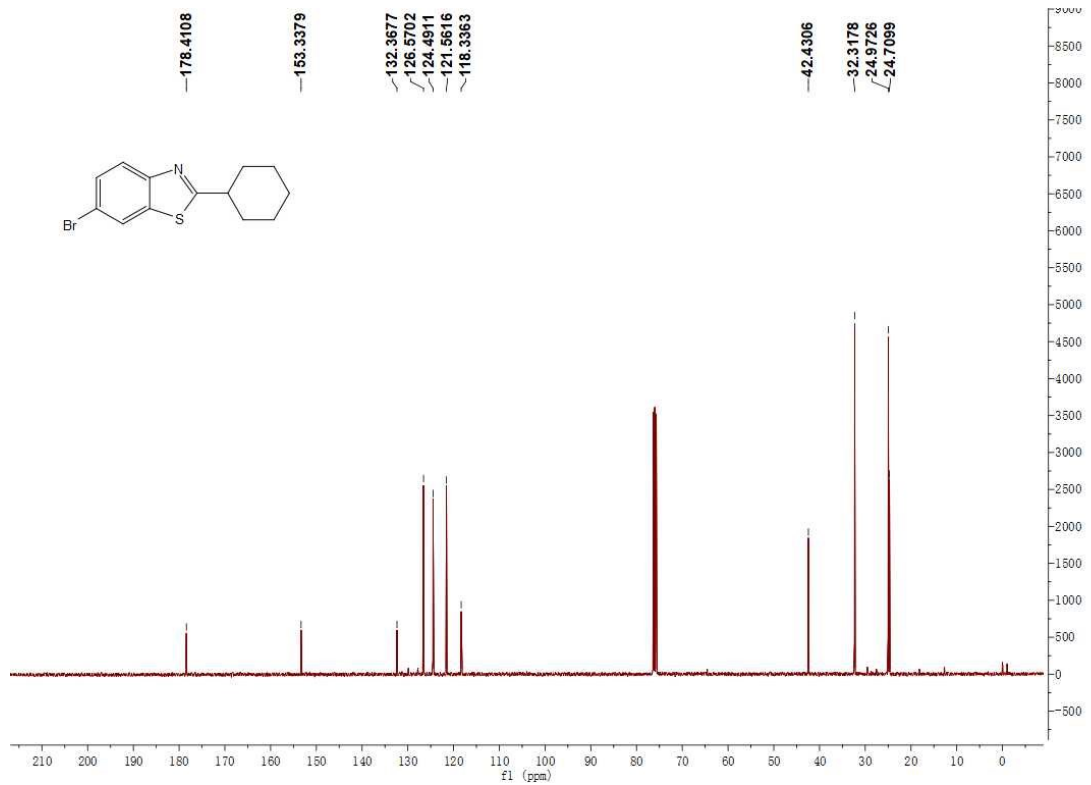

51

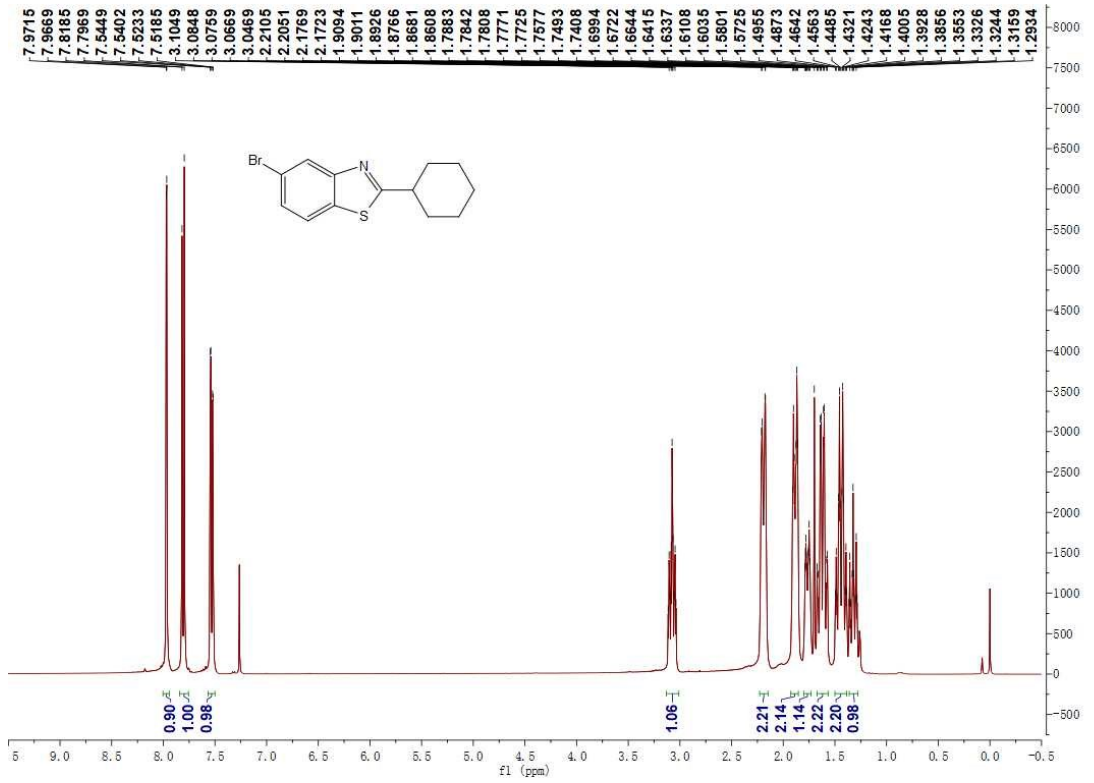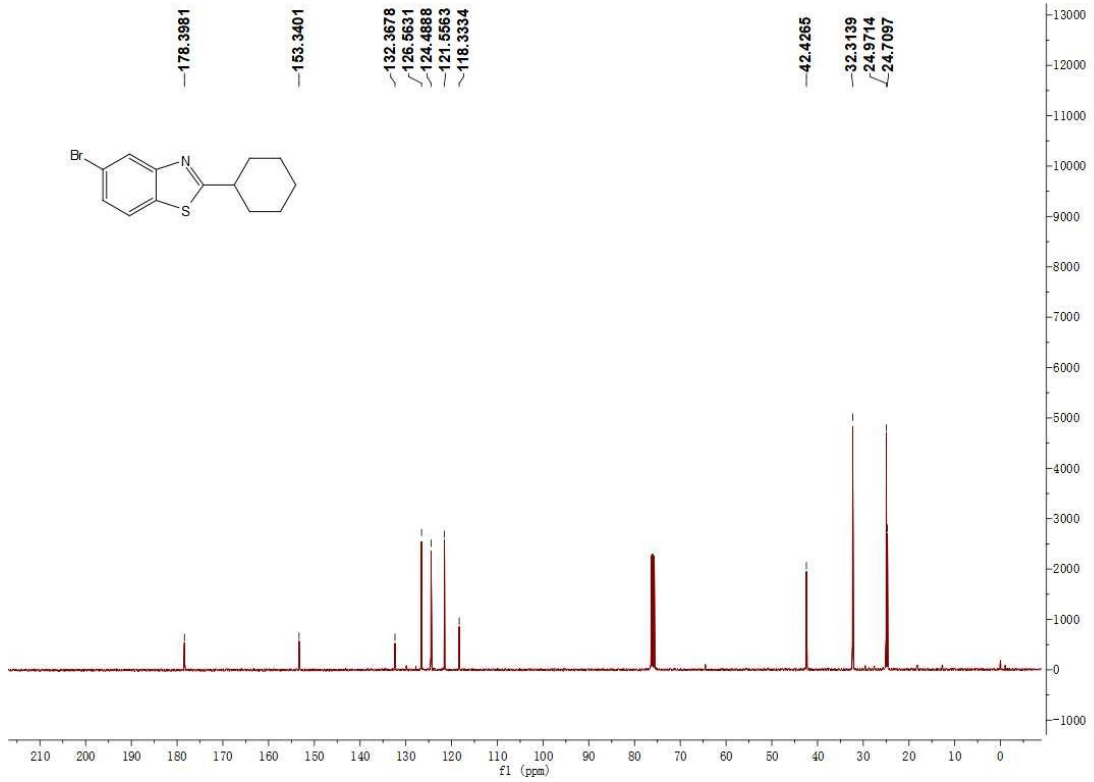



5m

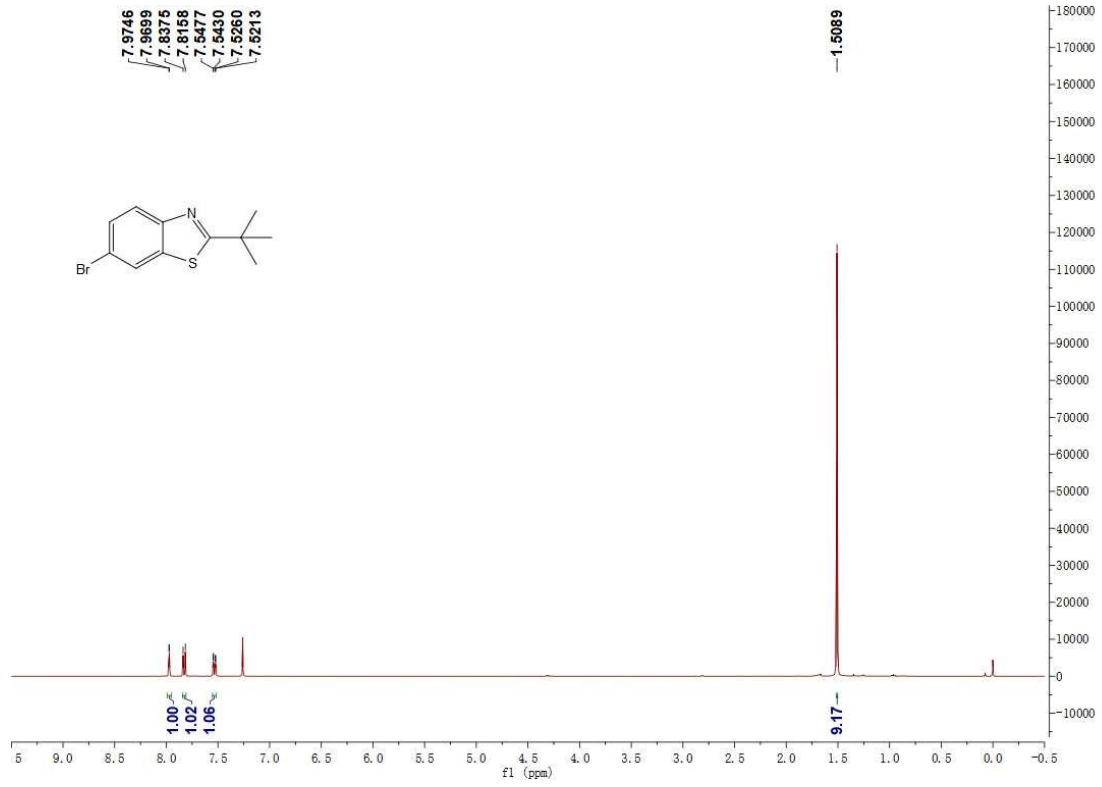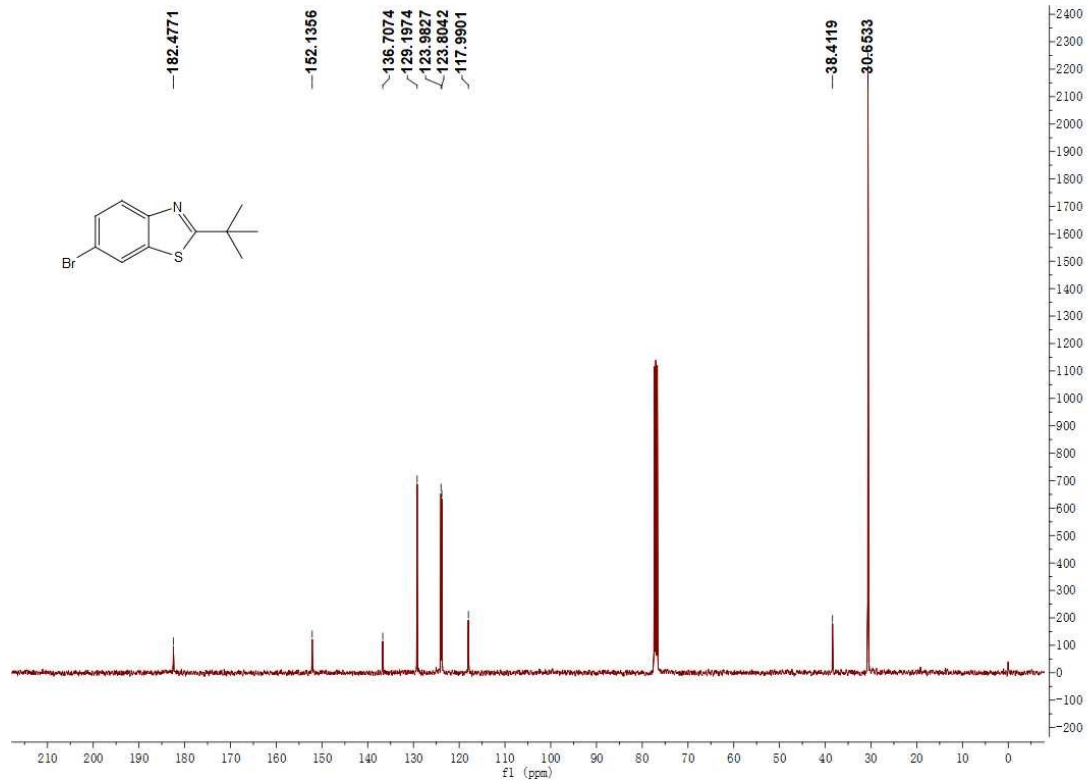

6

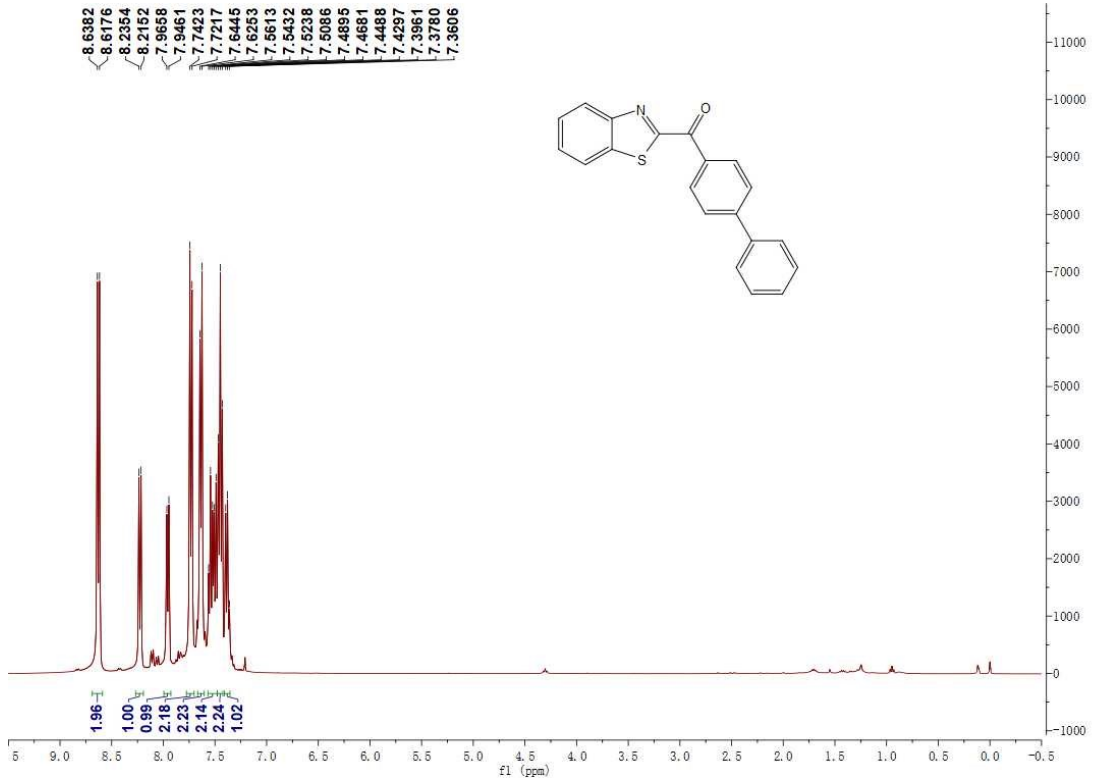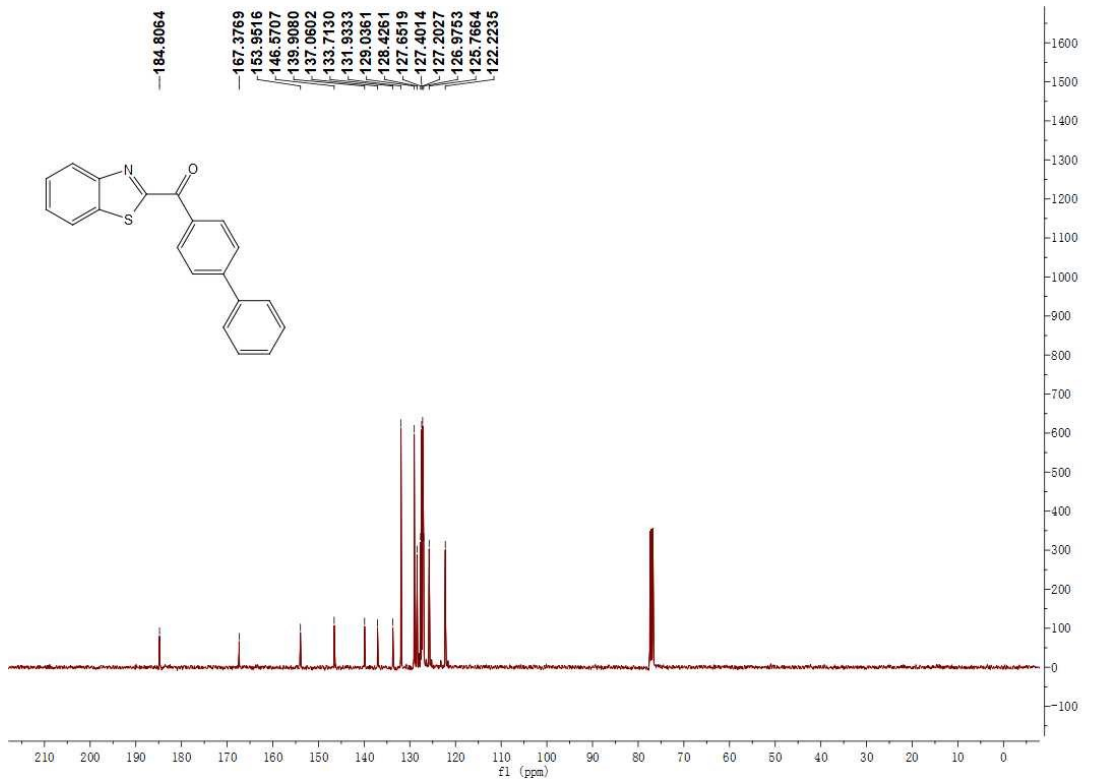

Supplement: d1ob00734c1.pdf [file d1ob00734c1.pdf]
